# Supplementary material for: Prioritizing multiple therapeutic targets in parallel using automated DNA-encoded library screening
Source: PubMed Central journal article supplement (PMC5520047; doi:10.1038/ncomms16081), 2017-07-17
Supplement: ncomms16081-s1.pdf [file ncomms16081-s1.pdf]

# SI GUIDE

Title of file for HTML: Supplementary Information

Description: Supplementary Figures, Supplementary Tables, Supplementary Notes, Supplementary Methods and Supplementary References.

1 SUPPLEMENTARY INFORMATION

2

3 Supplementary Figures:

4

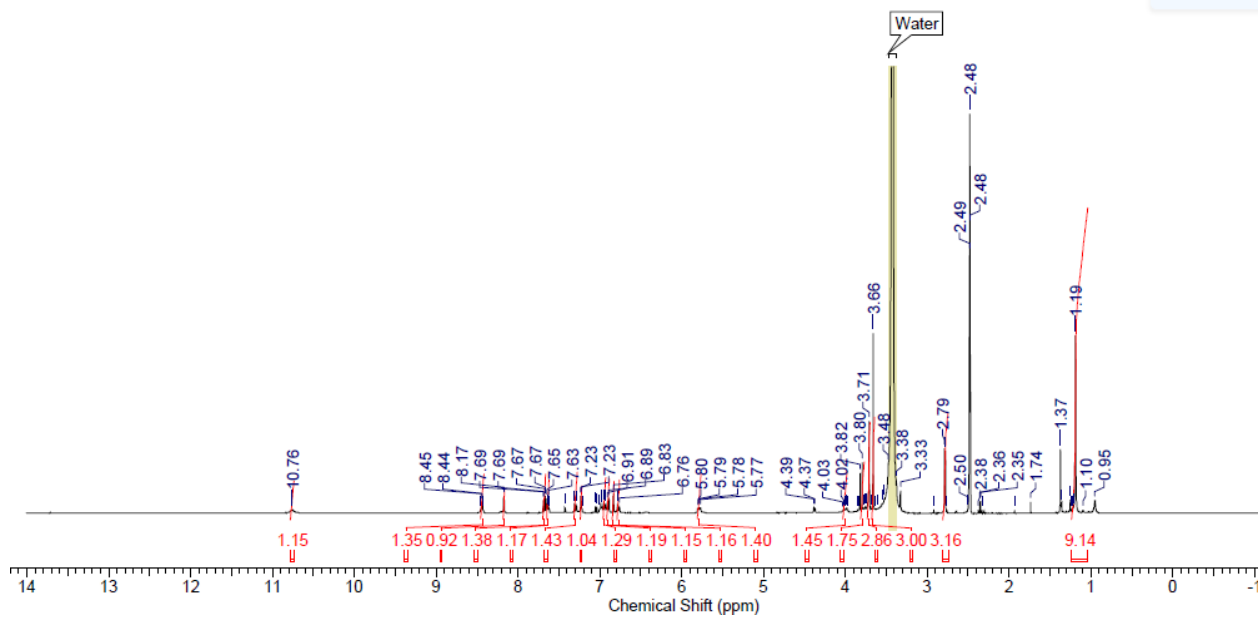

5

6 **Supplementary Figure 1:  $^1\text{H}$  NMR (DMSO- $d_6$ ) spectrum of 1-1.**

7

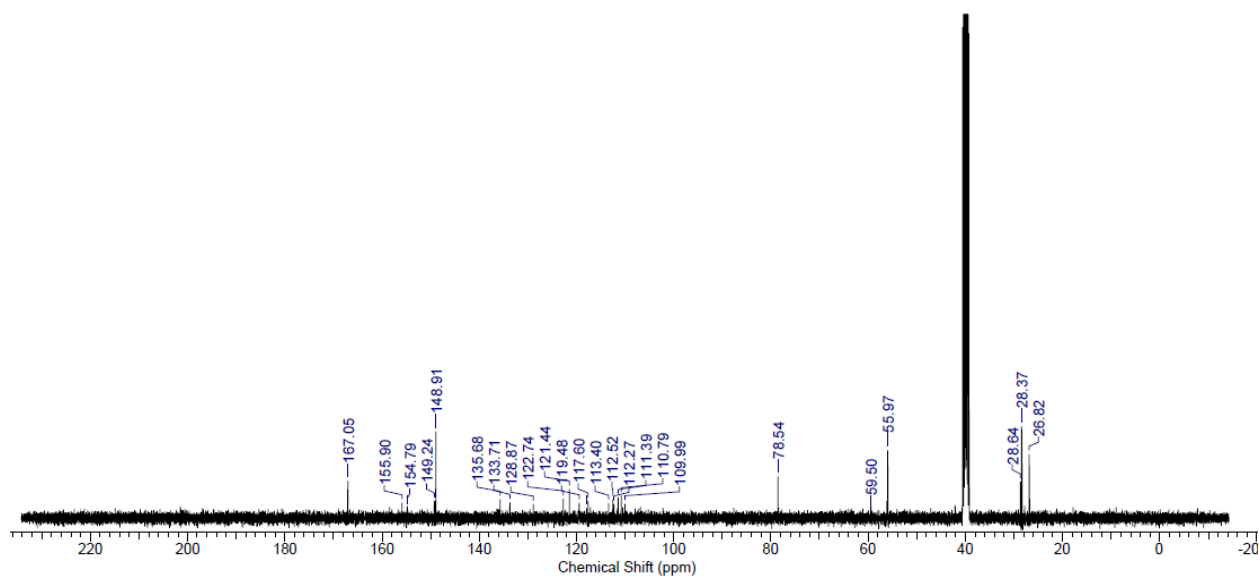

8

9 **Supplementary Figure 2:  $^{13}\text{C}$  NMR (DMSO- $d_6$ ) spectrum of 1-1.**

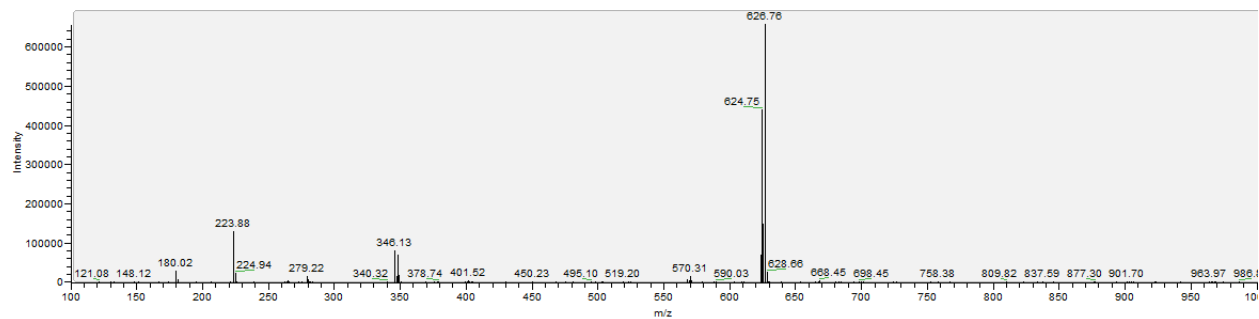

10

11 **Supplementary Figure 3: ESI MS spectrum of 1-1.**

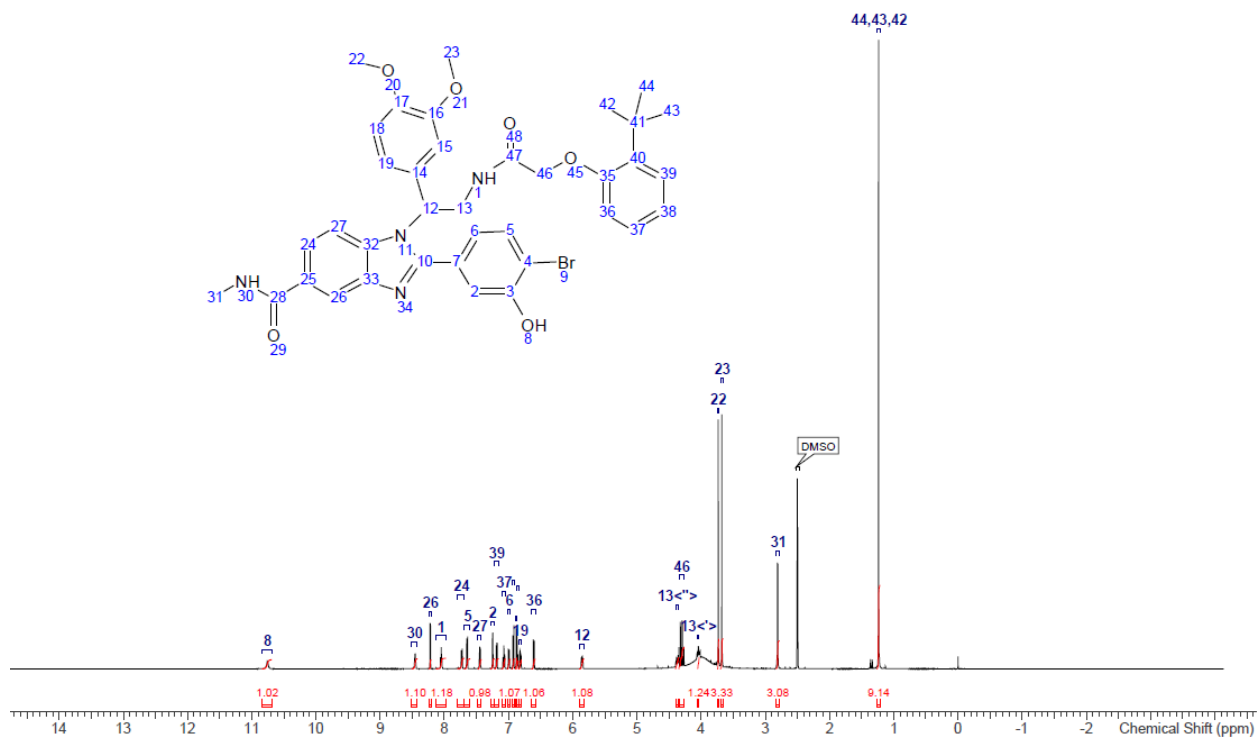

12

13 **Supplementary Figure 4: <sup>1</sup>H NMR (DMSO-d<sub>6</sub>) spectrum of 1.**

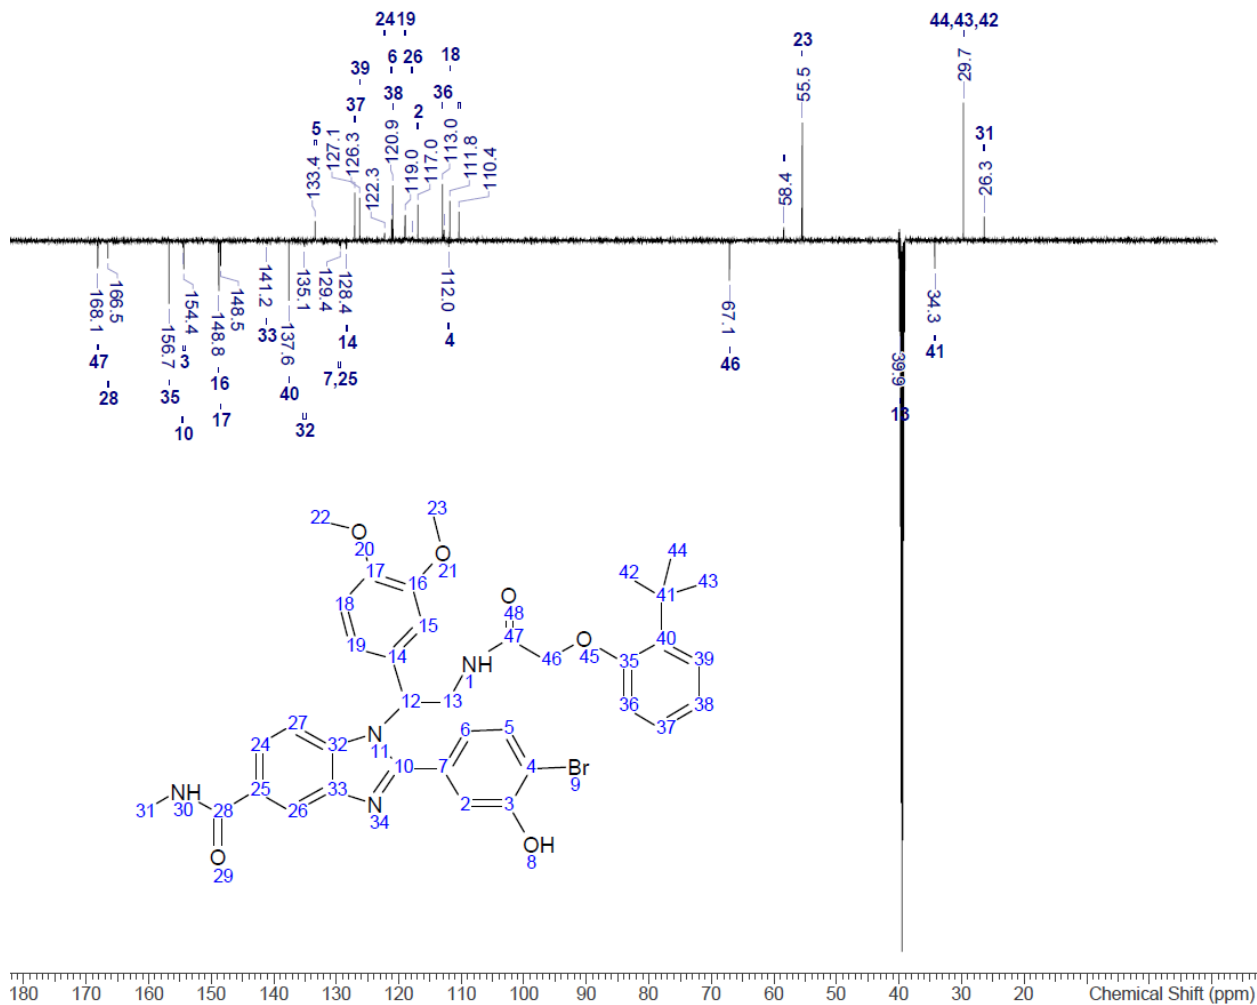

15 **Supplementary Figure 5:  $^{13}\text{C}$  NMR (DMSO- $d_6$ ) spectrum of 1.**

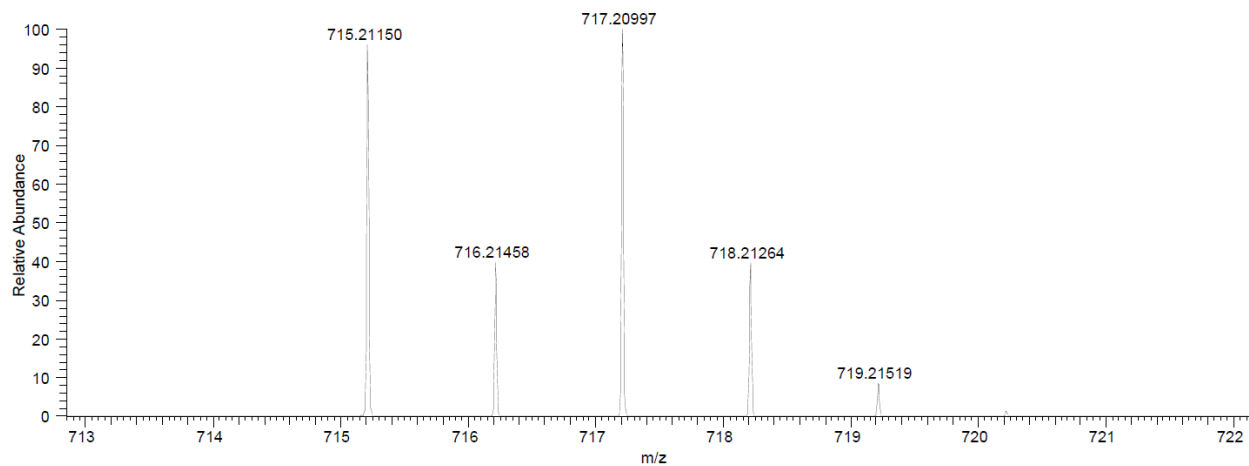

17 **Supplementary Figure 6: HRMS spectrum of 1.**

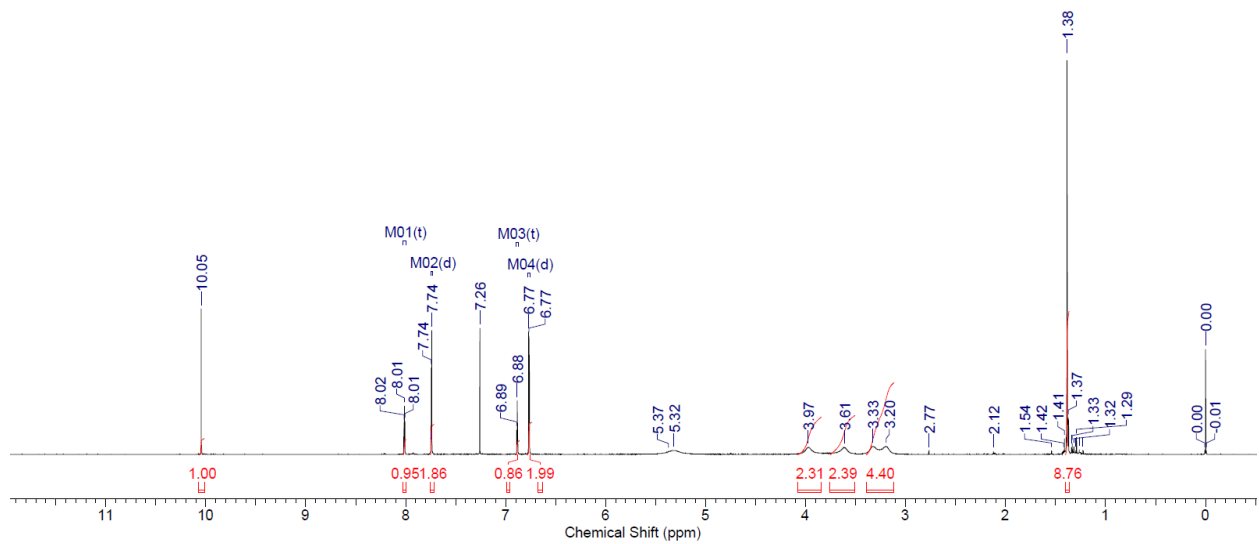

18

19 **Supplementary Figure 7:  $^1\text{H}$  NMR ( $\text{CDCl}_3$ ) spectrum of 2-1.**

20

21

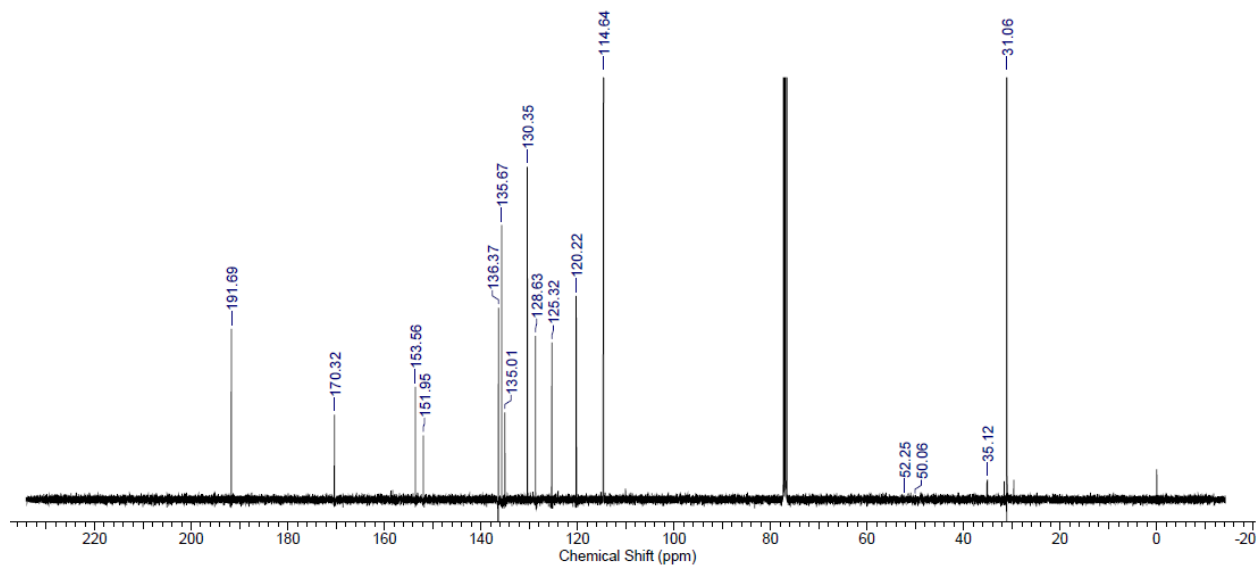

22

23 **Supplementary Figure 8:  $^{13}\text{C}$  NMR ( $\text{CDCl}_3$ ) spectrum of 2-1.**

24

25

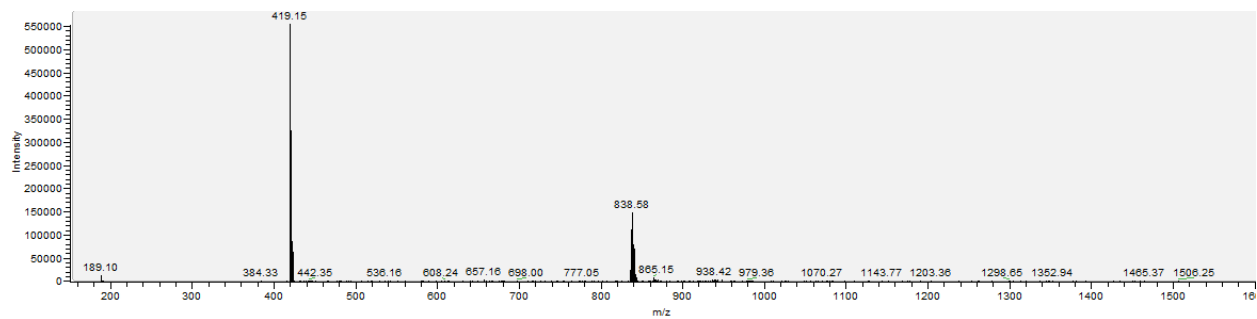

26

27 **Supplementary Figure 9: ESI MS spectrum of 2-1.**

28

29

30

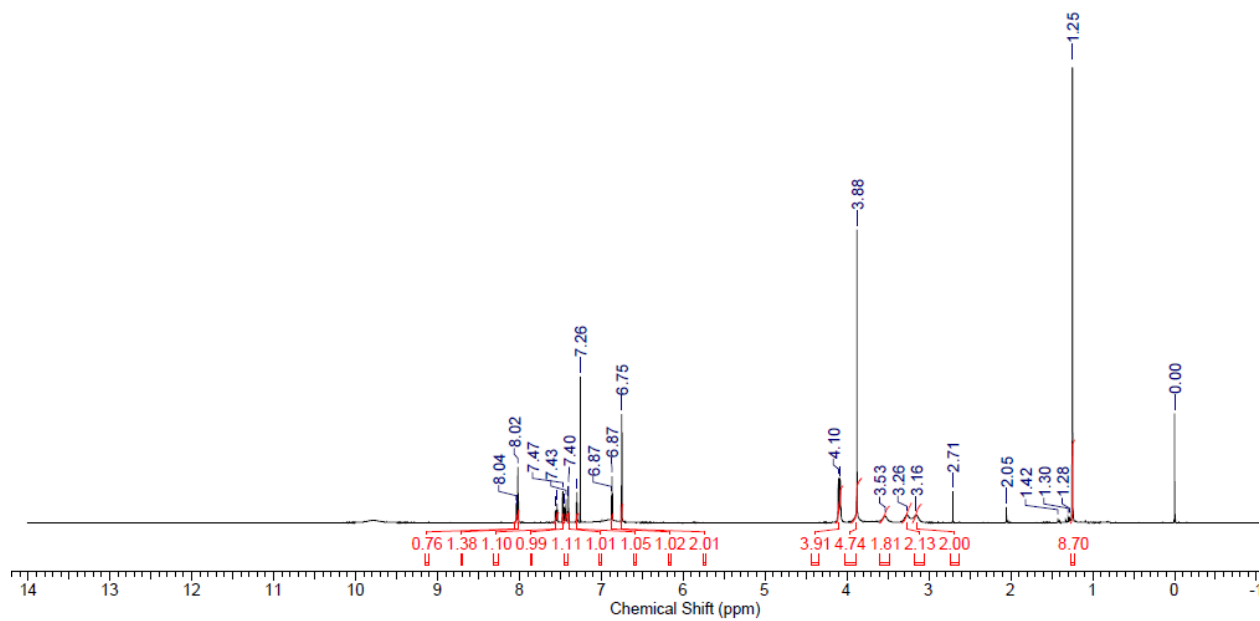

31

32 **Supplementary Figure 10: <sup>1</sup>H NMR (CDCl<sub>3</sub>) spectrum of 2-2.**

33

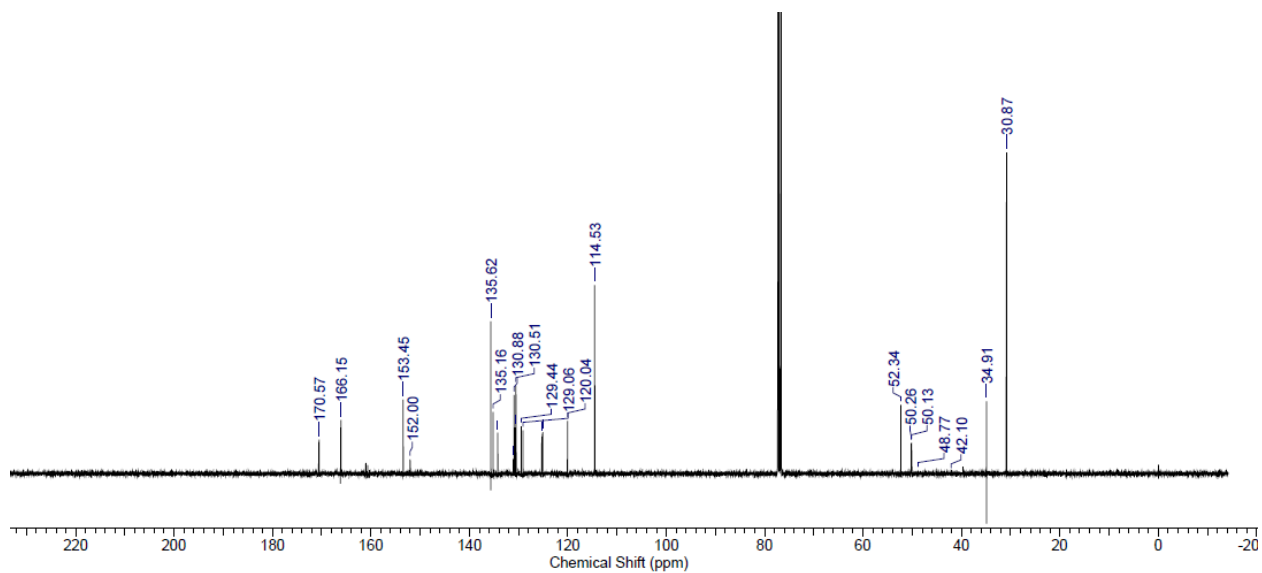

34

35 **Supplementary Figure 11:  $^{13}\text{C}$  NMR ( $\text{CDCl}_3$ ) spectrum of 2-2.**

36

37

38

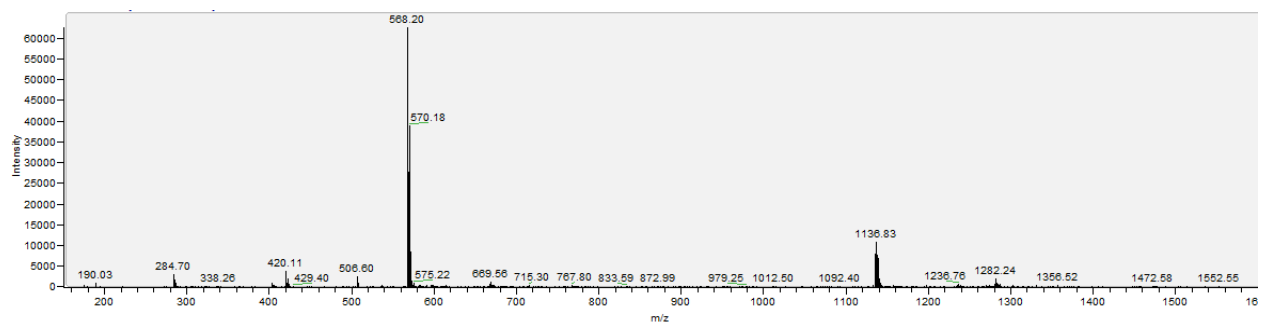

39

40 **Supplementary Figure 12: ESI MS spectrum of 2-2.**

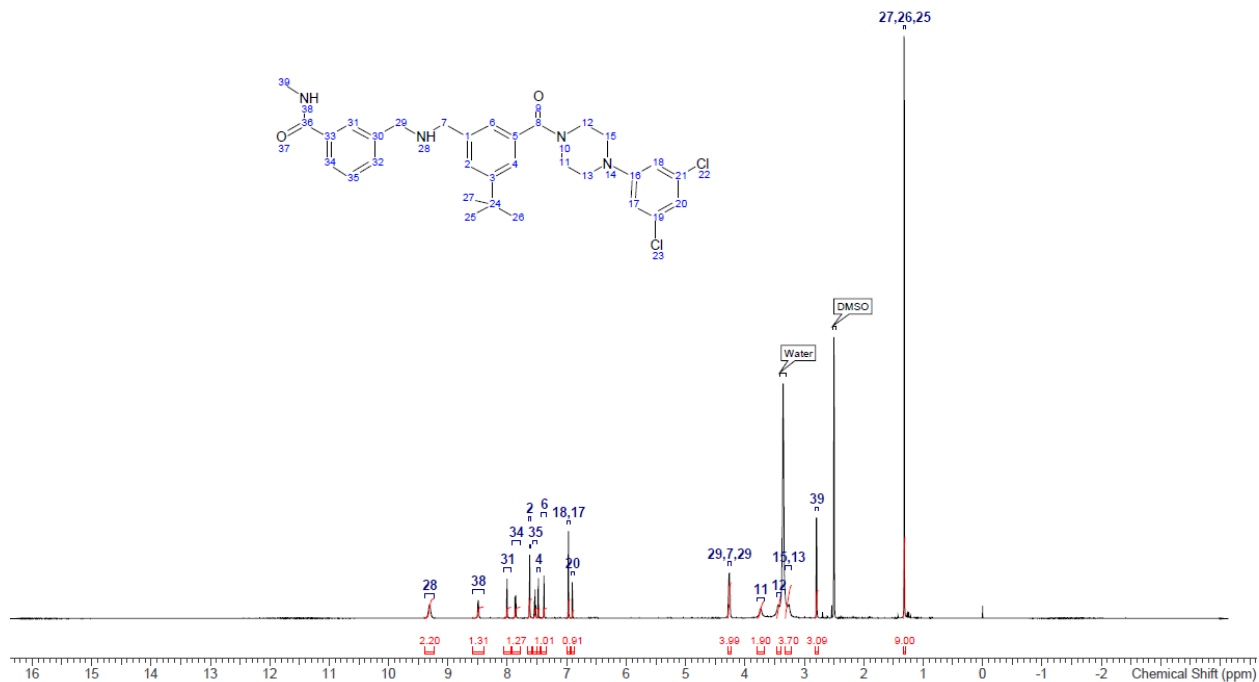

41

42 Supplementary Figure 13:  $^1\text{H}$  NMR (DMSO- $d_6$ ) spectrum of 2.

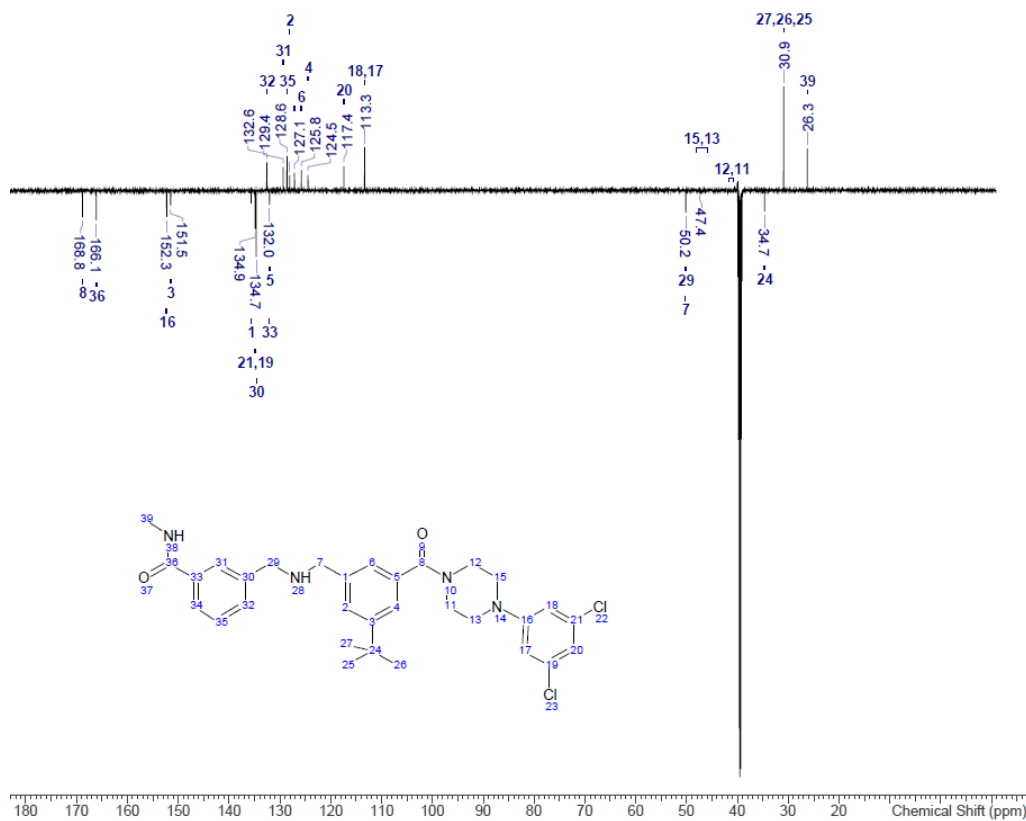

43

44 Supplementary Figure 14:  $^{13}\text{C}$  NMR (DMSO- $d_6$ ) spectrum of 2.



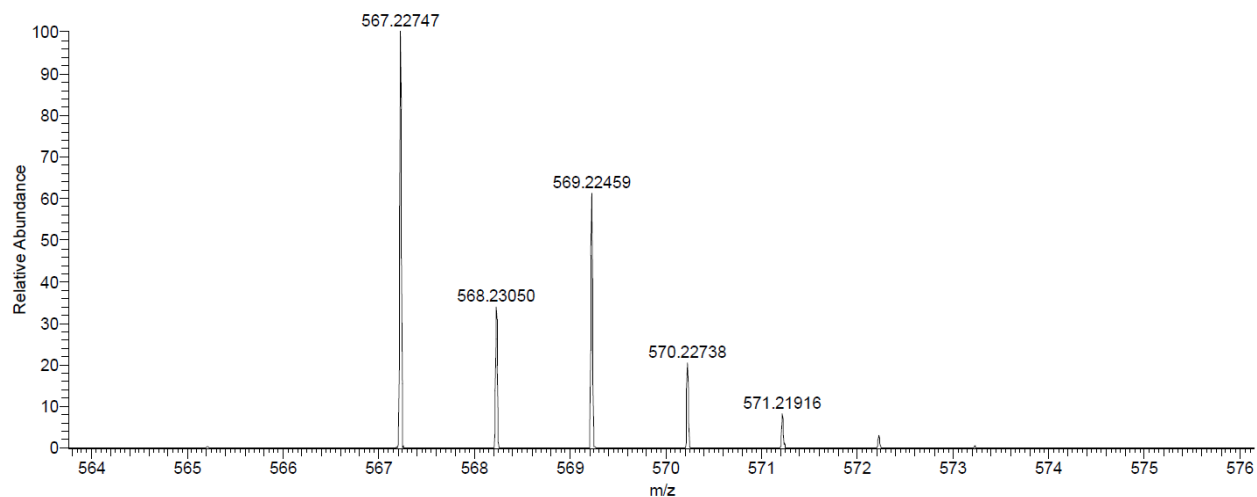

45

46 **Supplementary Figure 15: HRMS spectrum of 2.**

47

48

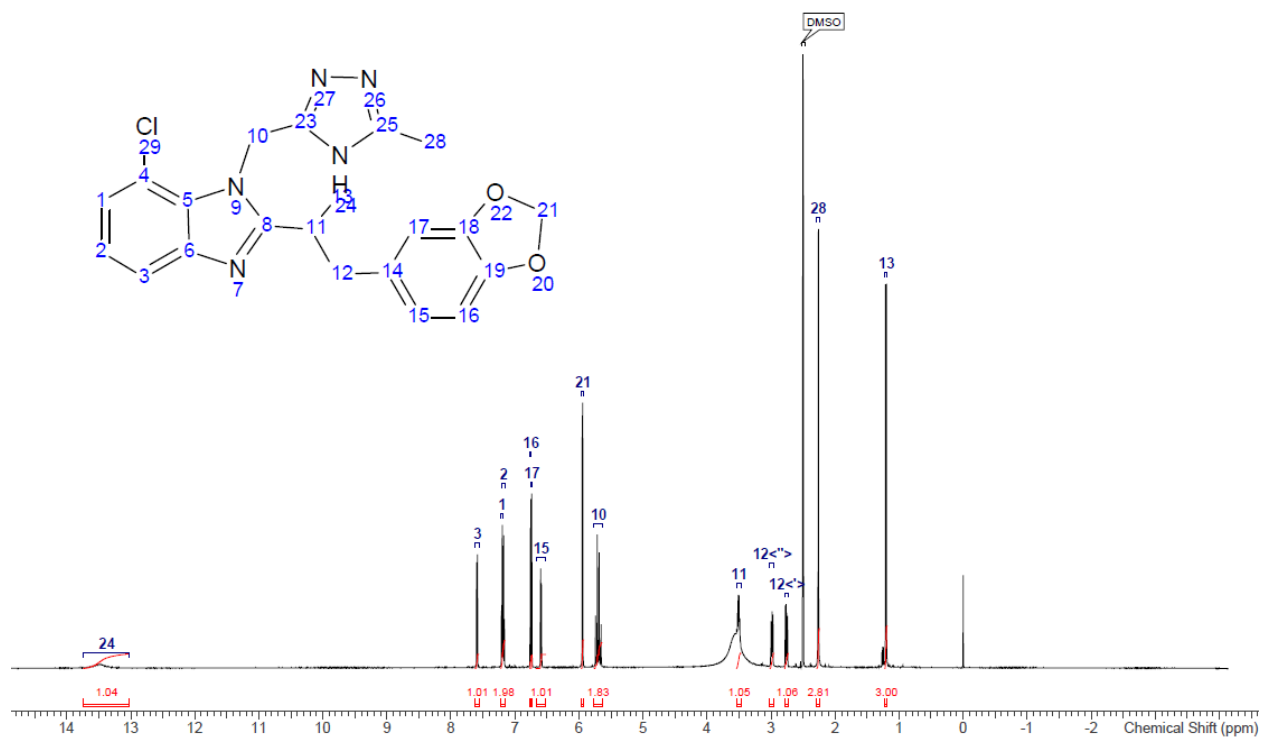

49

50 **Supplementary Figure 16: <sup>1</sup>H NMR (DMSO-d<sub>6</sub>) spectrum of 3.**

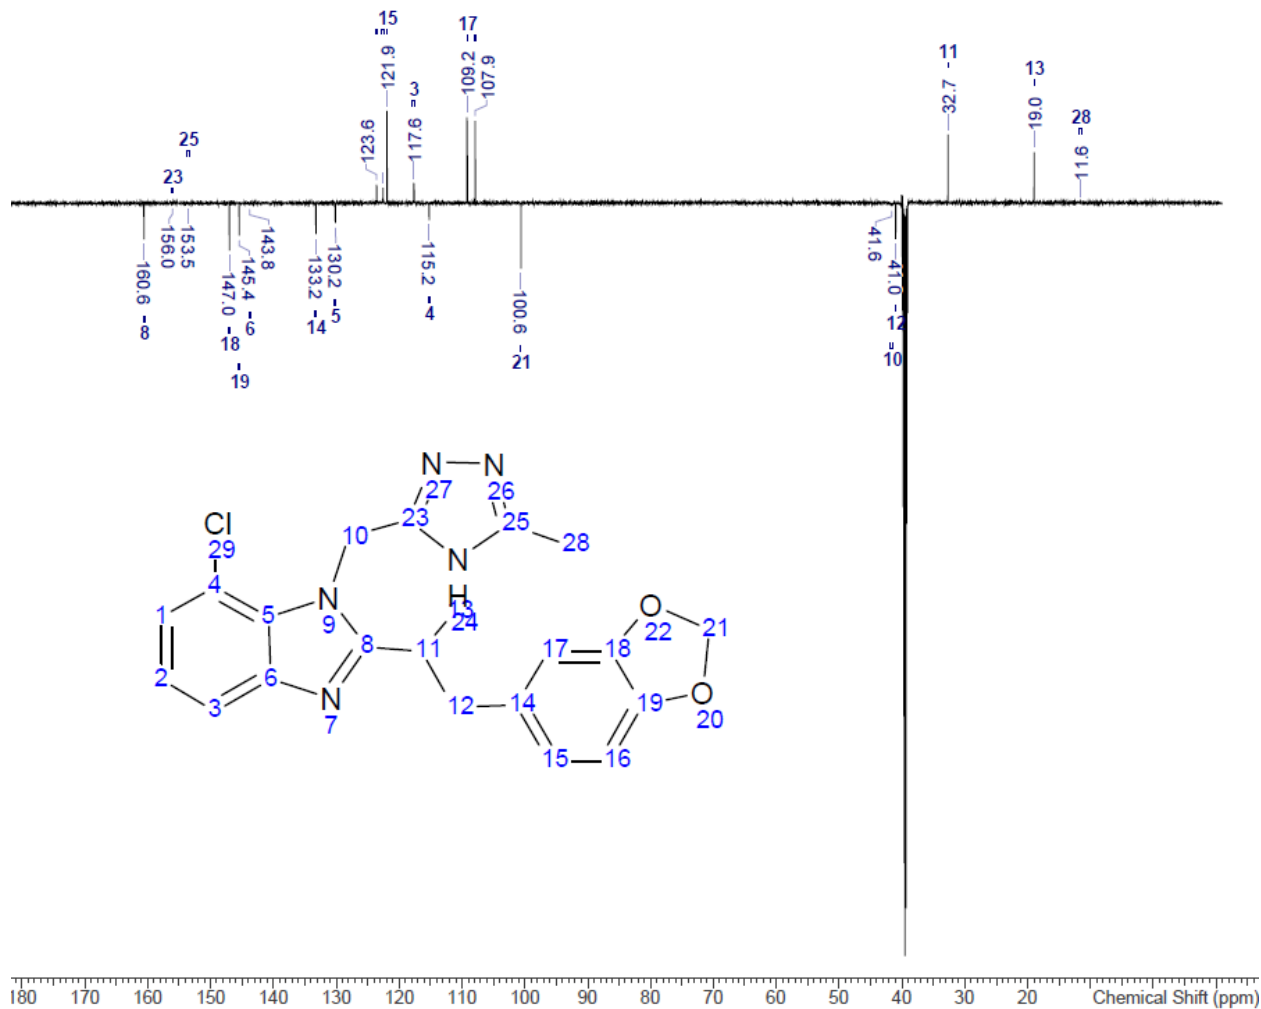

51

52 **Supplementary Figure 17:  $^{13}\text{C}$  NMR (DMSO- $d_6$ ) spectrum of 3.**

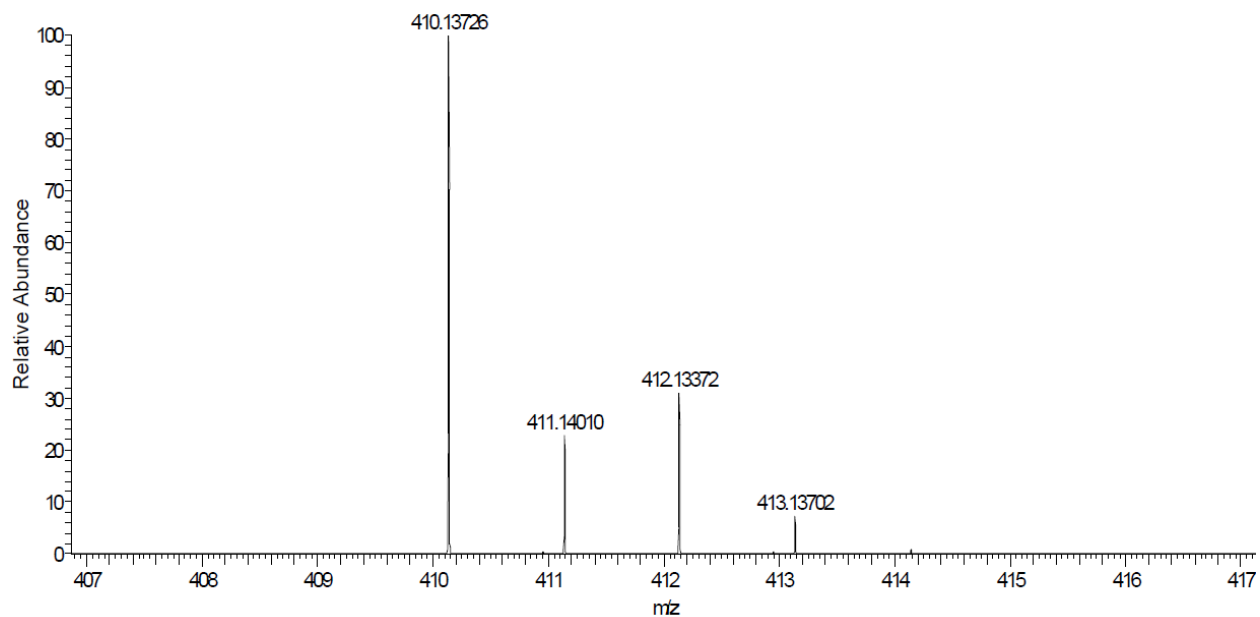

53

54 **Supplementary Figure 18: HRMS spectrum of 3.**

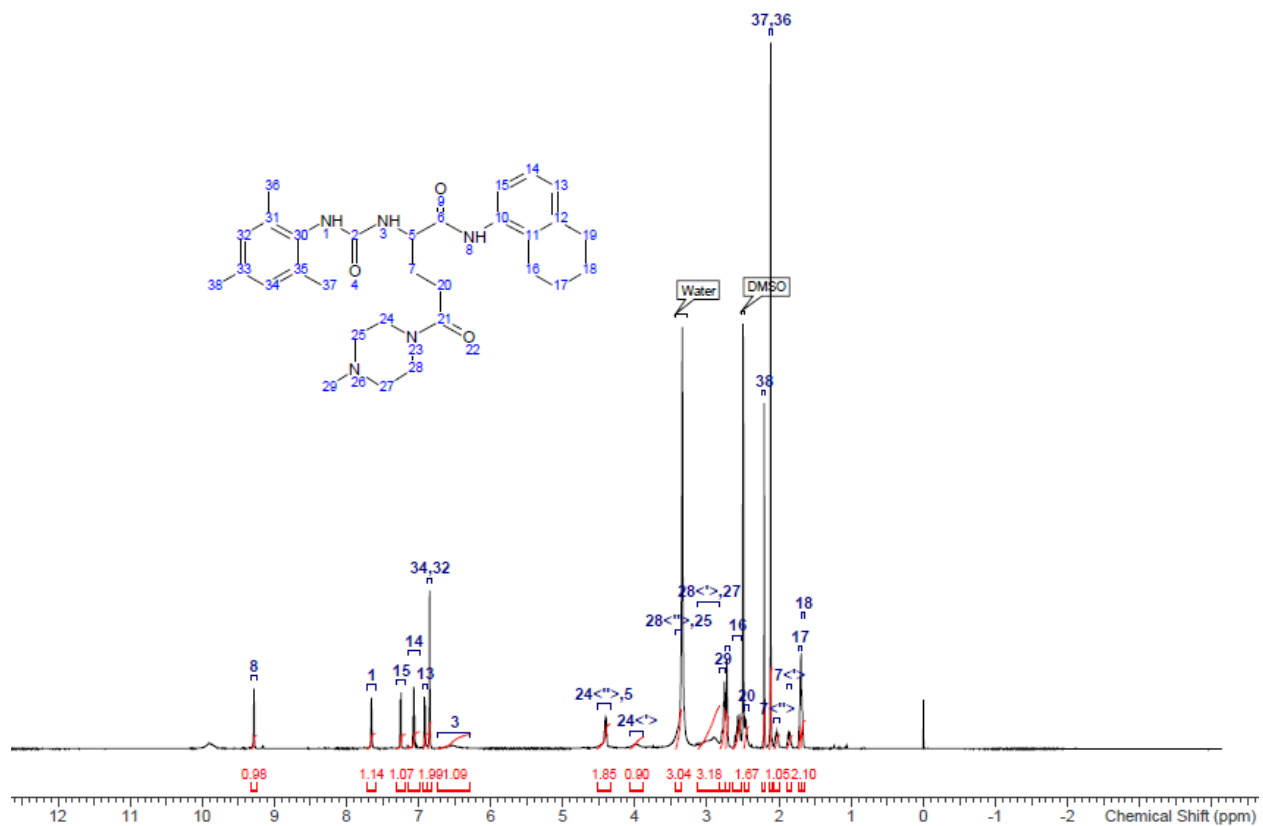

55

56 **Supplementary Figure 19: <sup>1</sup>H NMR (DMSO-d<sub>6</sub>) spectrum of 4.**

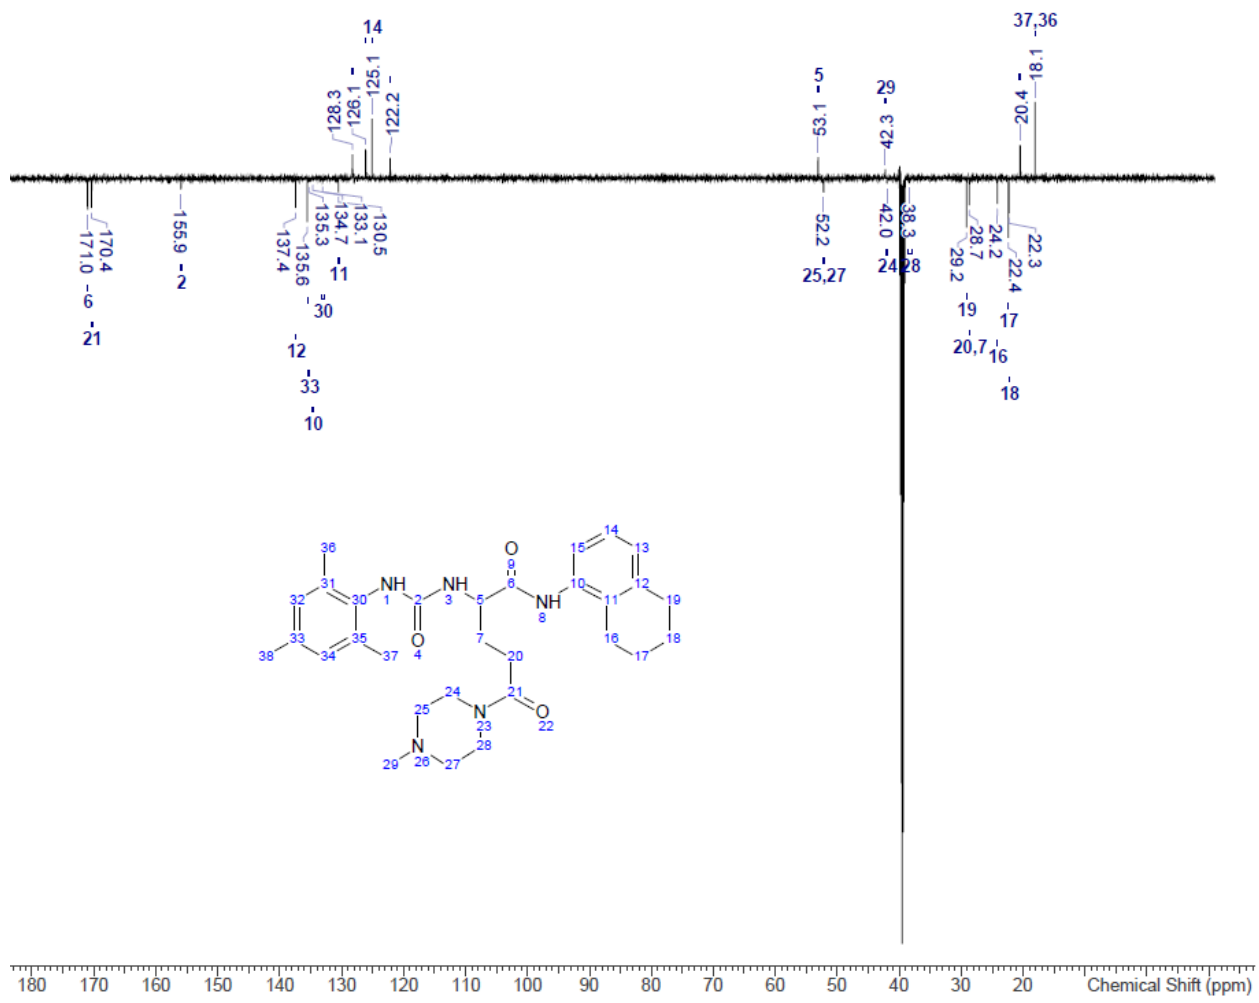

57

58 Supplementary Figure 20:  $^{13}\text{C}$  NMR ( $\text{DMSO-d}_6$ ) spectrum of 4.

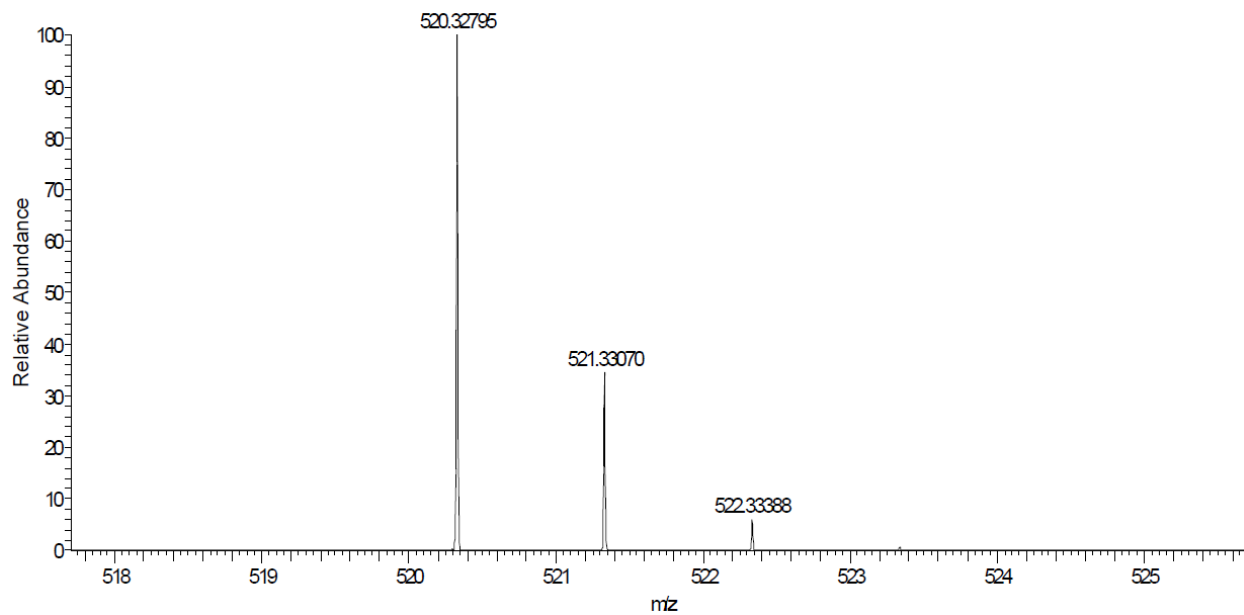

59

60 **Supplementary Figure 21: HRMS spectrum of 4.**

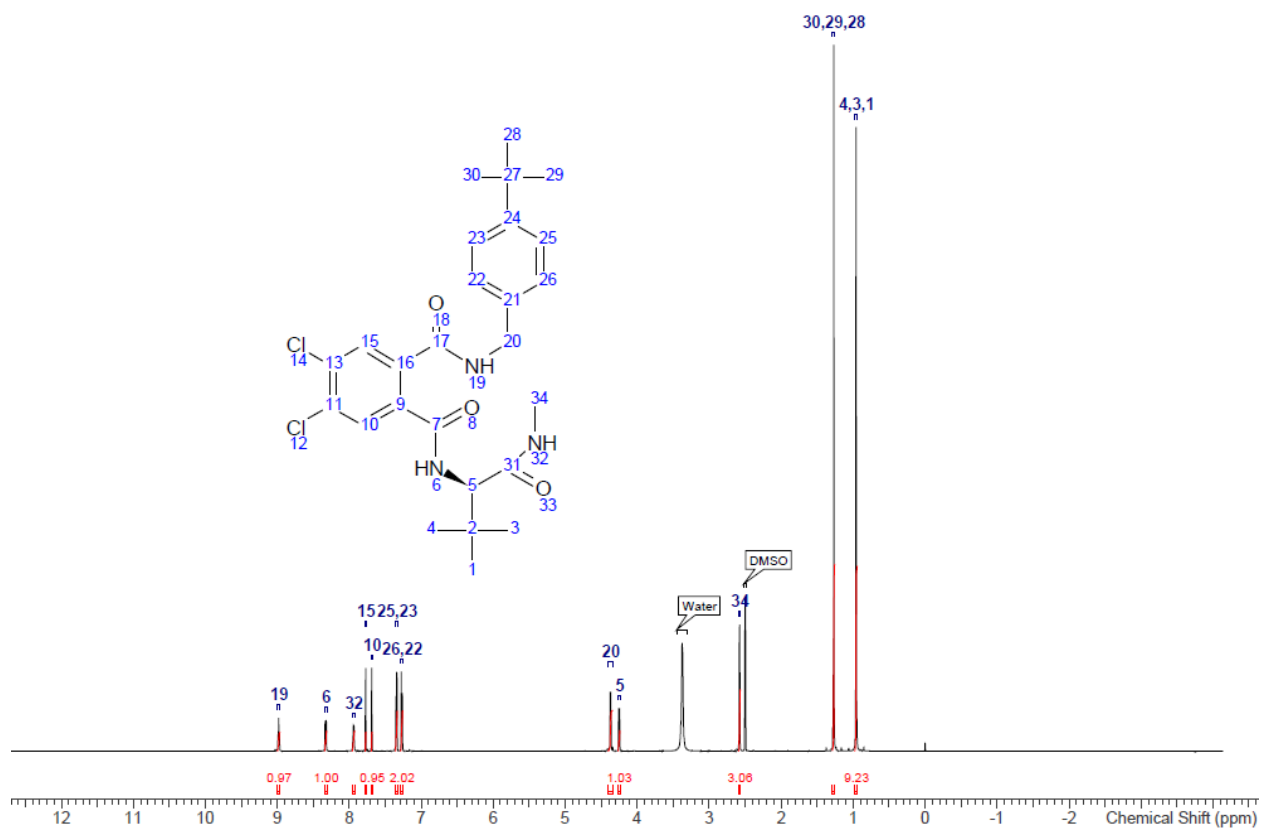

61

62 **Supplementary Figure 22: <sup>1</sup>H NMR (DMSO-d<sub>6</sub>) spectrum of 5.**

63

64

65

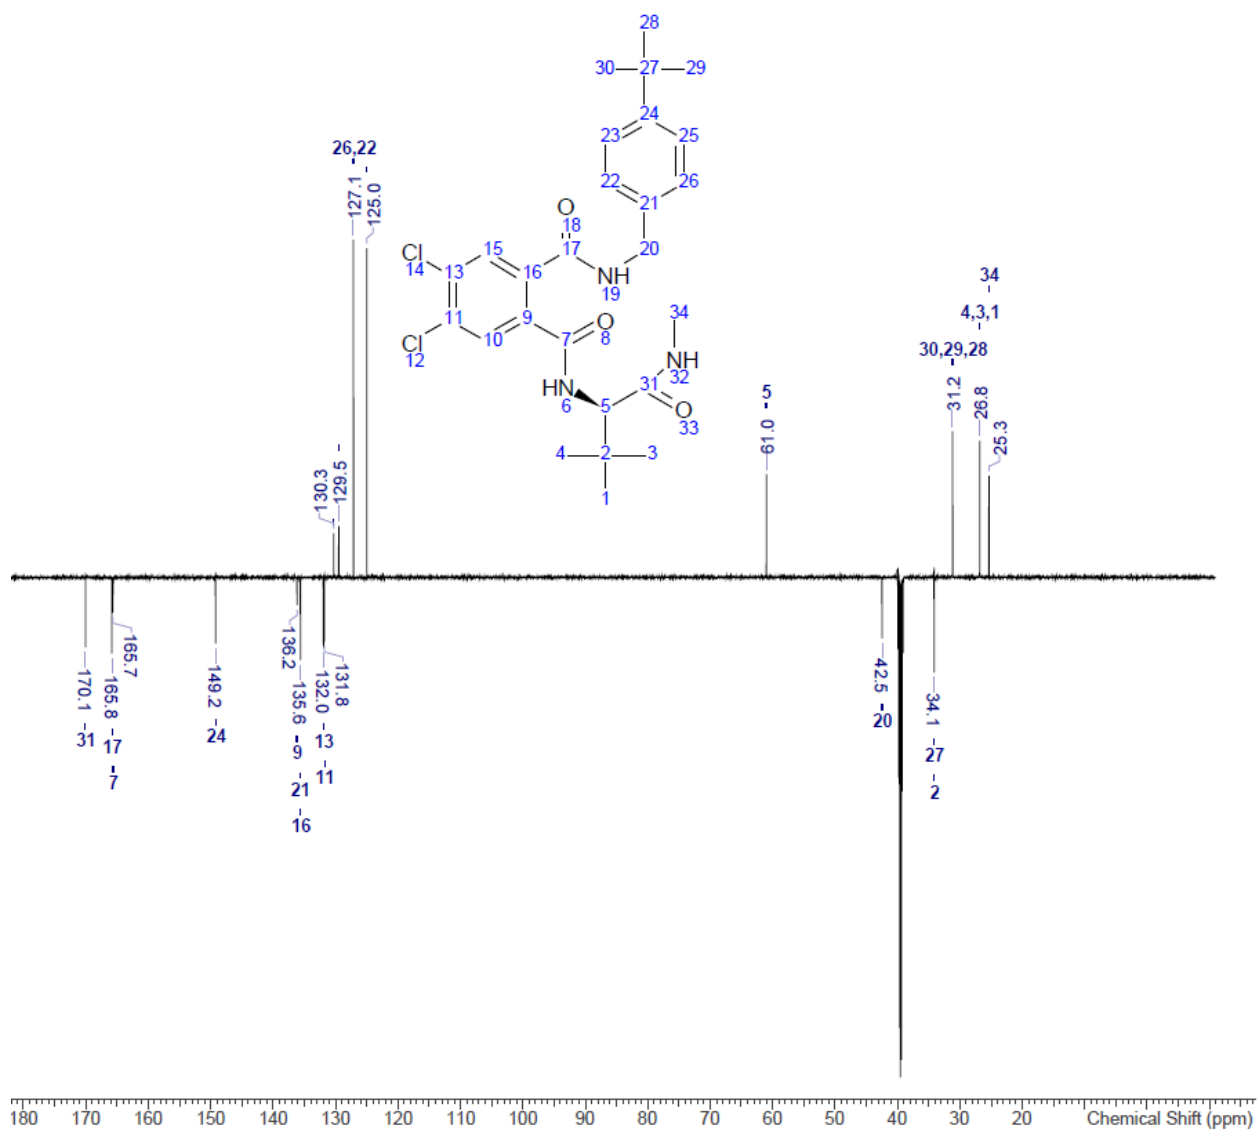

66

67 **Supplementary Figure 23:  $^{13}\text{C}$  NMR (DMSO- $d_6$ ) spectrum of 5.**

68

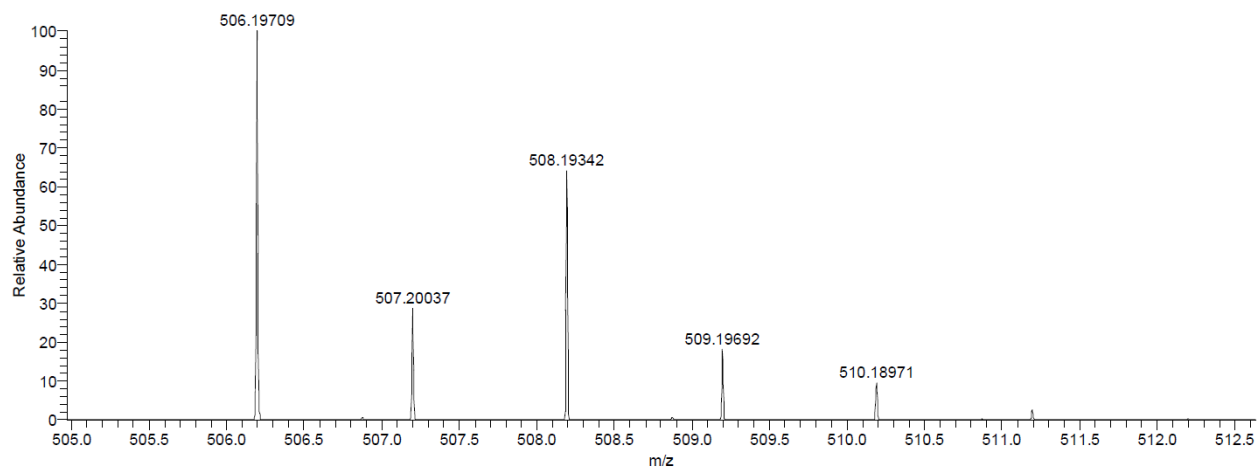

69

70 **Supplementary Figure 24: HRMS spectrum of 5.**

71

72

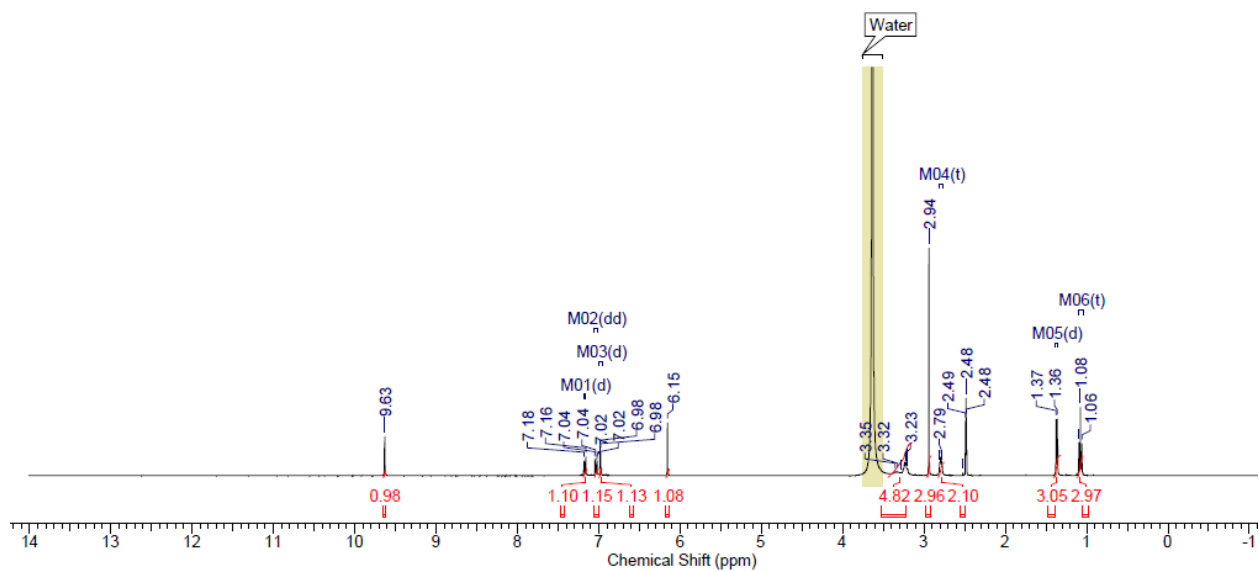

73

74 **Supplementary Figure 25: <sup>1</sup>H NMR (DMSO-d<sub>6</sub>) spectrum of 6-1.**

75

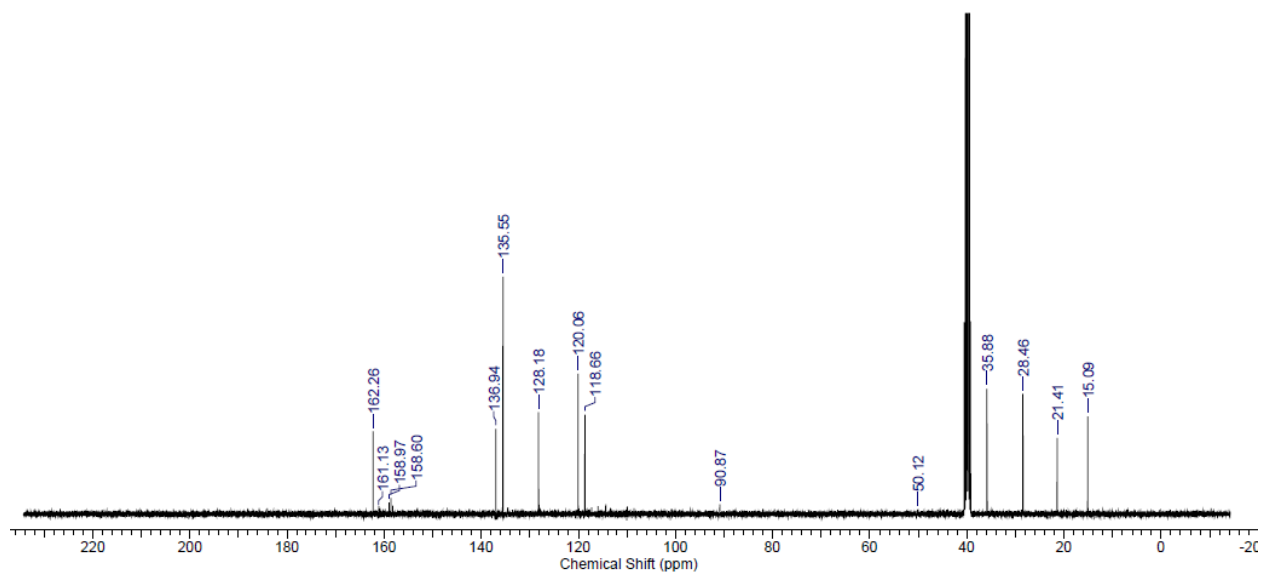

76

77 **Supplementary Figure 26:  $^{13}\text{C}$  NMR ( $\text{DMSO-d}_6$ ) spectrum of 6-1.**

78

79

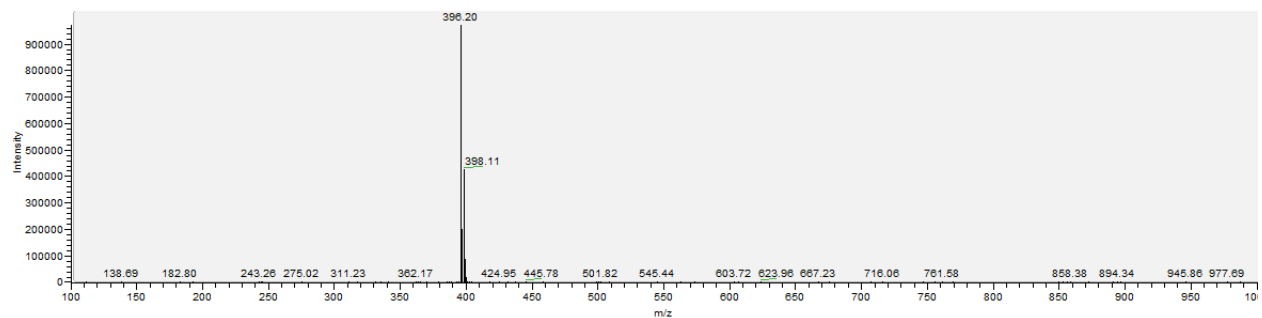

80

81 **Supplementary Figure 27: ESI MS spectrum of 6-1.**

82

83

84

85

86

87

88



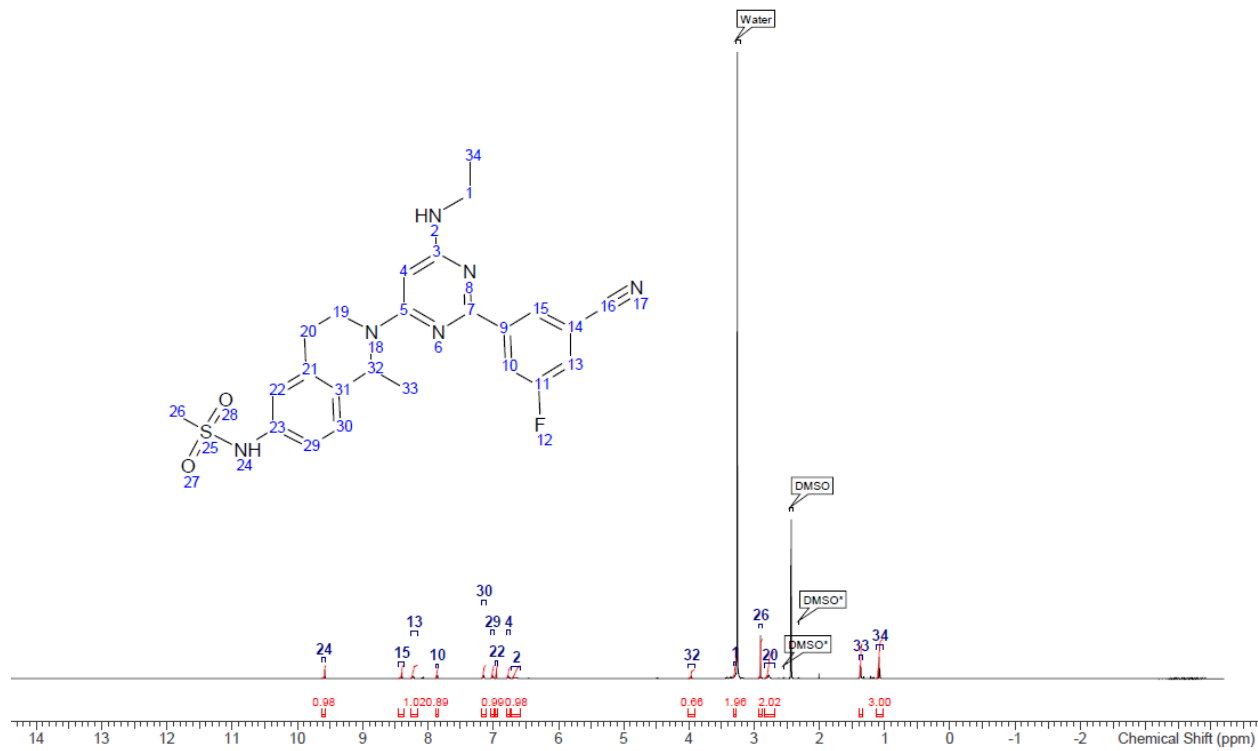

90

91 **Supplementary Figure 28:  $^1\text{H}$  NMR ( $\text{DMSO-d}_6$ ) spectrum of 6.**

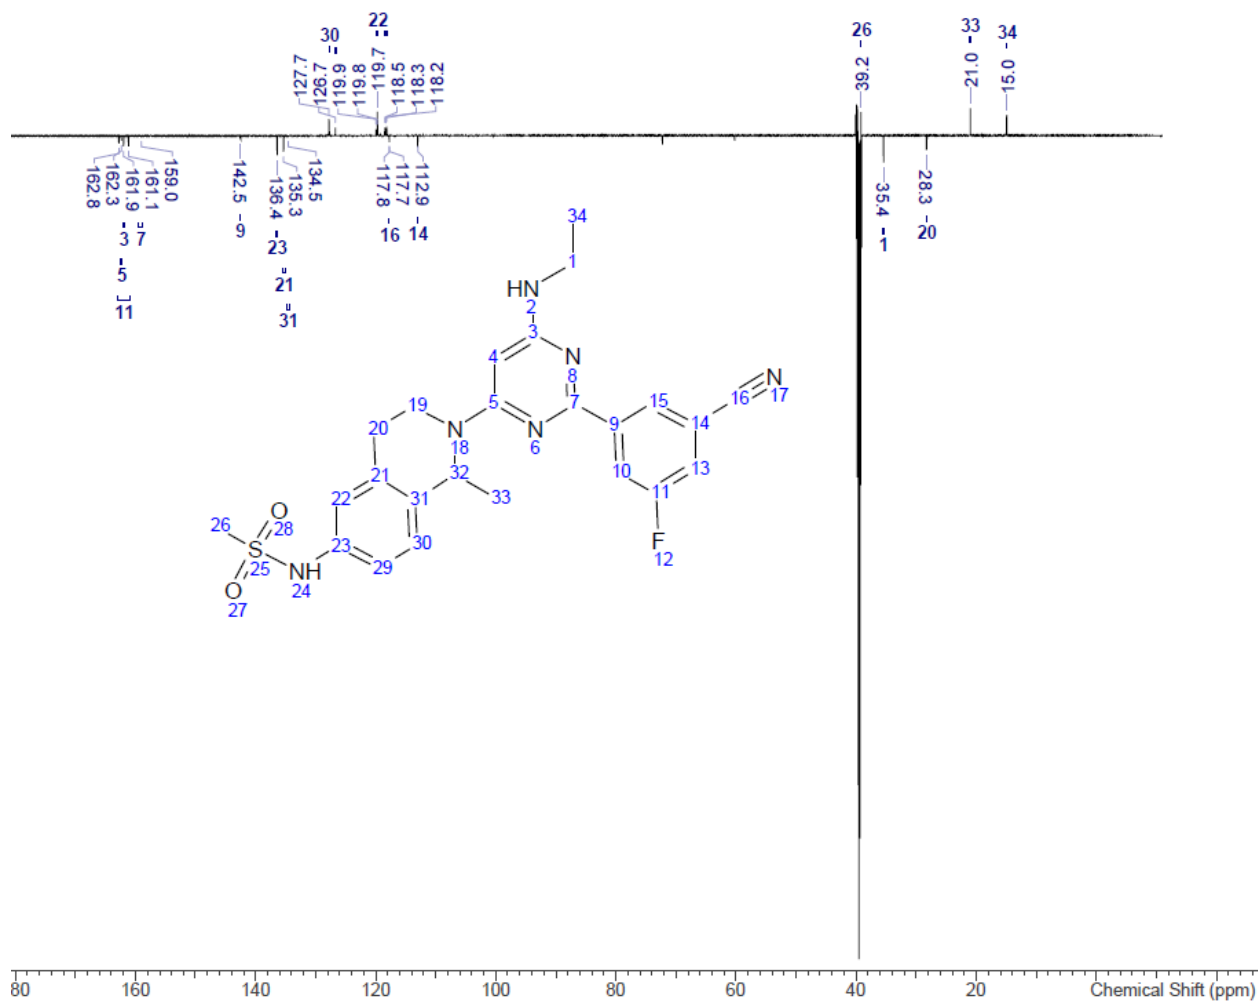

92

93 **Supplementary Figure 29: <sup>13</sup>C NMR (DMSO-d<sub>6</sub>) spectrum of 6.**

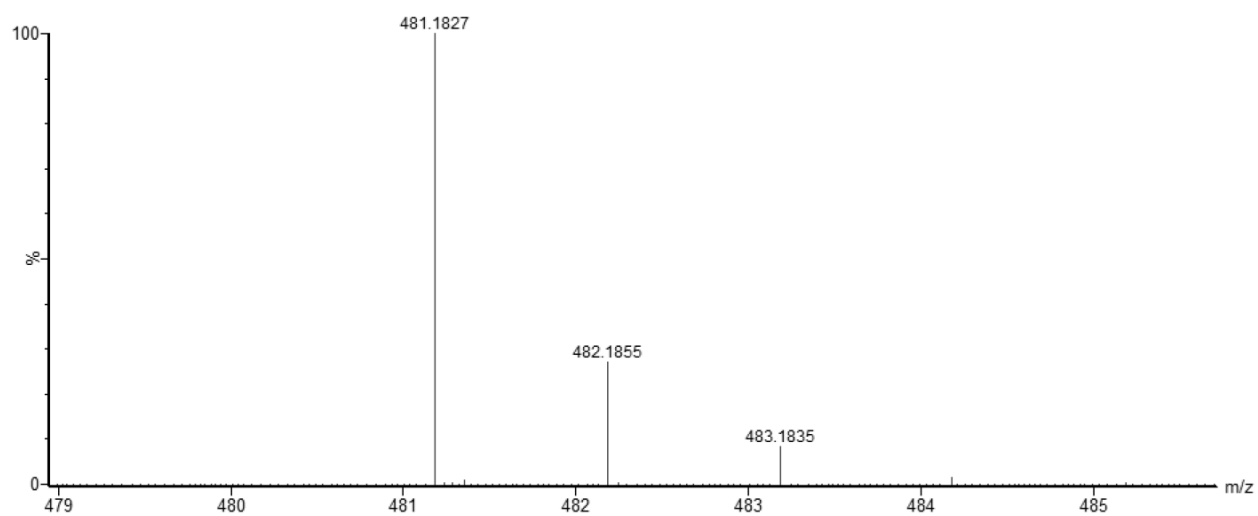

94

95 **Supplementary Figure 30: HRMS spectrum of 6.**

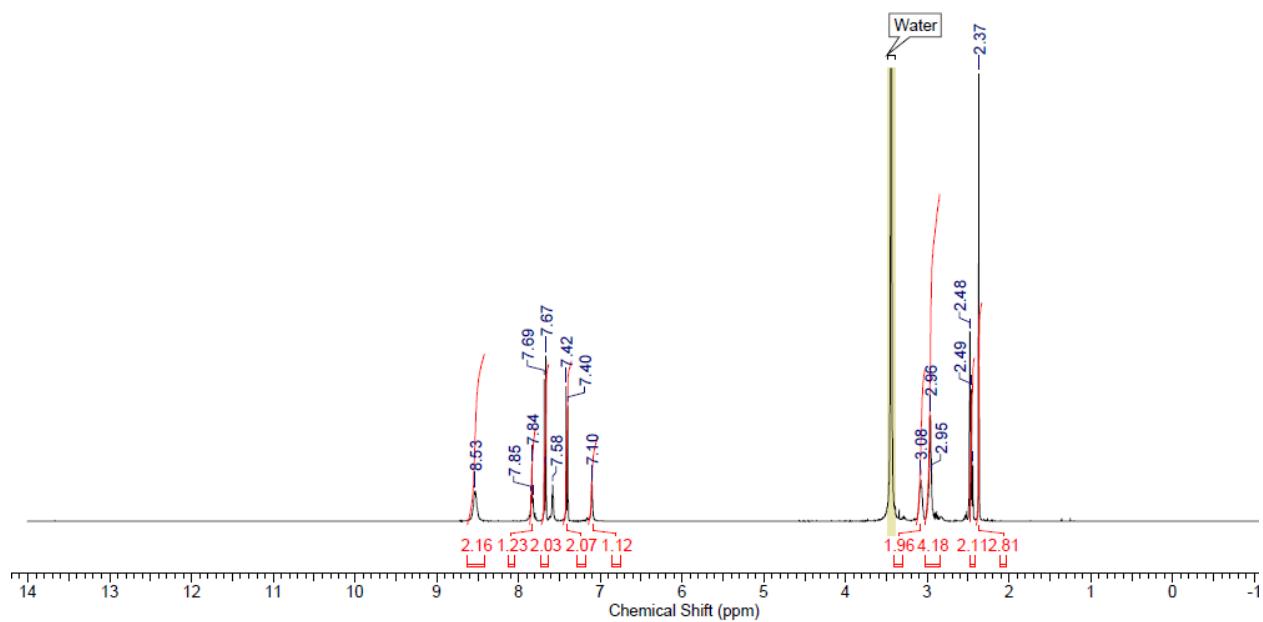

96

97 **Supplementary Figure 31:  $^1\text{H}$  NMR (DMSO- $d_6$ ) spectrum of 7-1.**

98

99

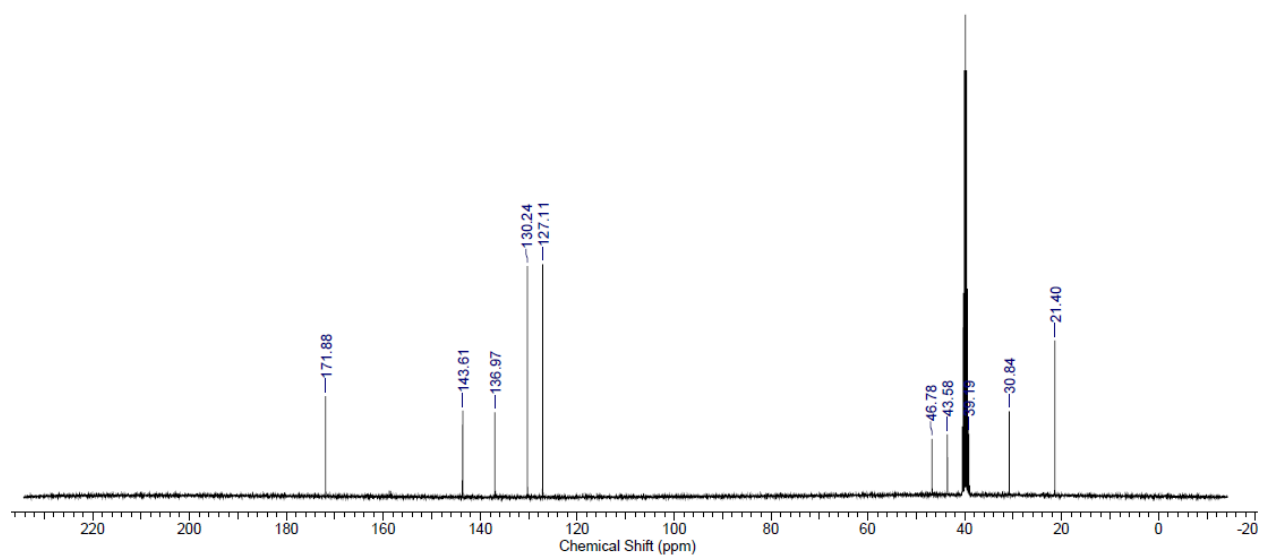

100

101 **Supplementary Figure 32:  $^{13}\text{C}$  NMR (DMSO- $d_6$ ) spectrum of 7-1.**

102

103

104

105

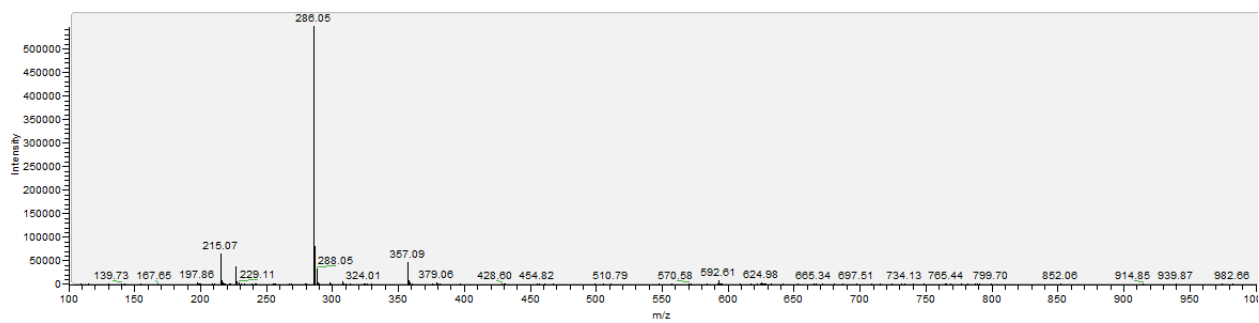

106

107 **Supplementary Figure 33: ESI MS spectrum of 7-1.**

108

109

110

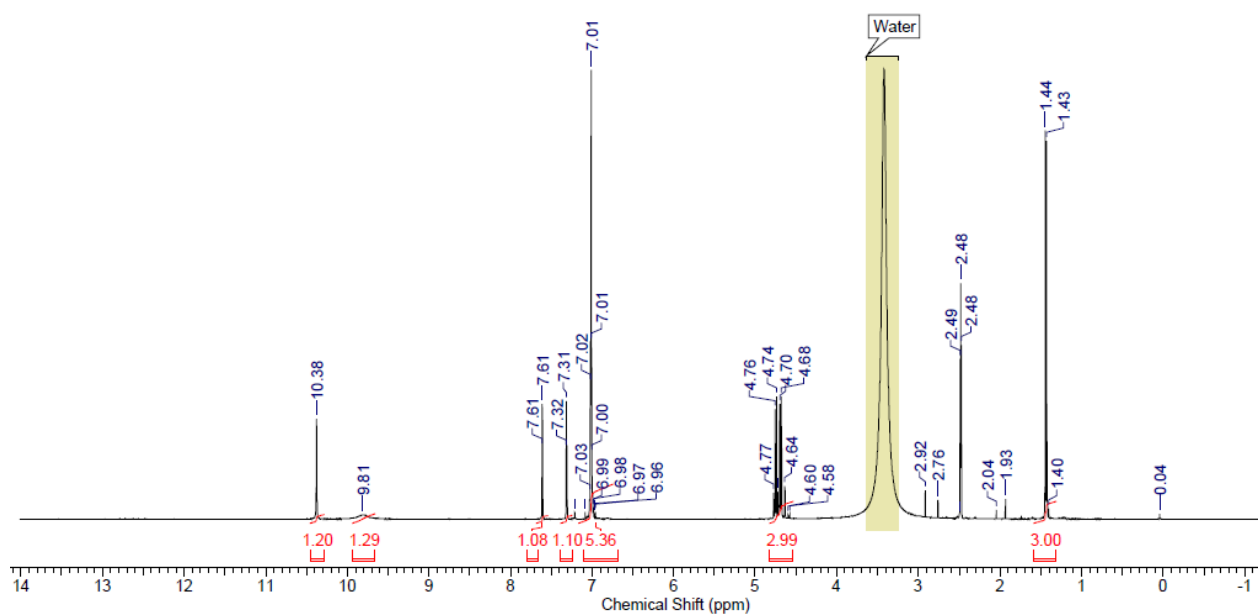

111

112 **Supplementary Figure 34: <sup>1</sup>H NMR (DMSO-d<sub>6</sub>) spectrum of 7-2.**

113

114

115

116

117

118

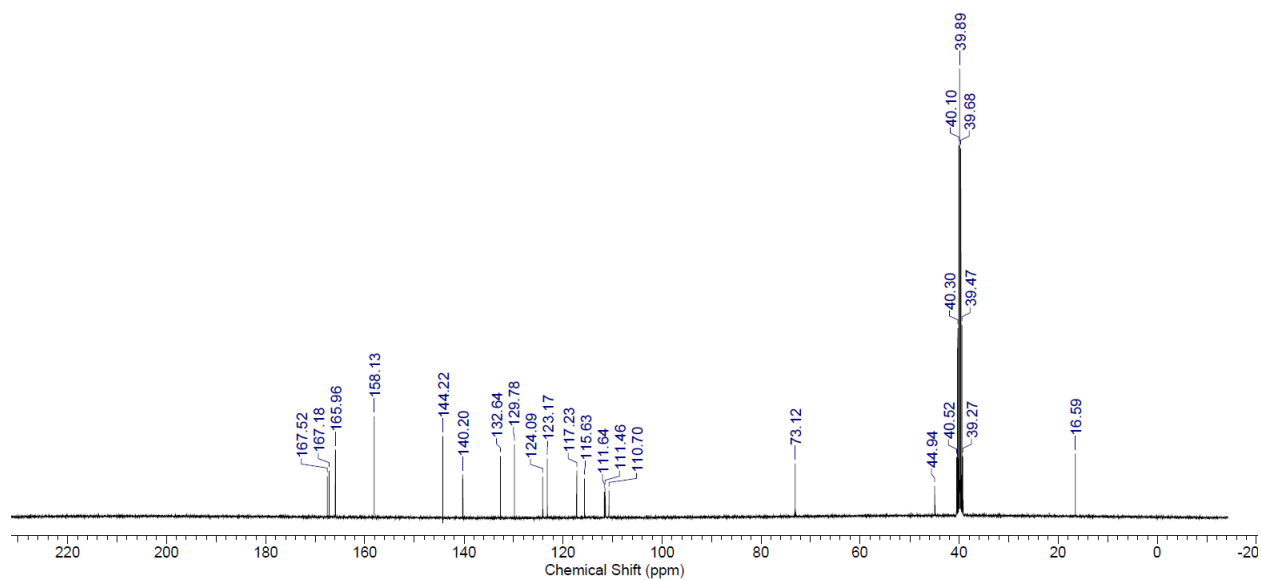

119

120 **Supplementary Figure 35:  $^{13}\text{C}$  NMR (DMSO- $d_6$ ) spectrum of 7-2.**

121

122

123

124

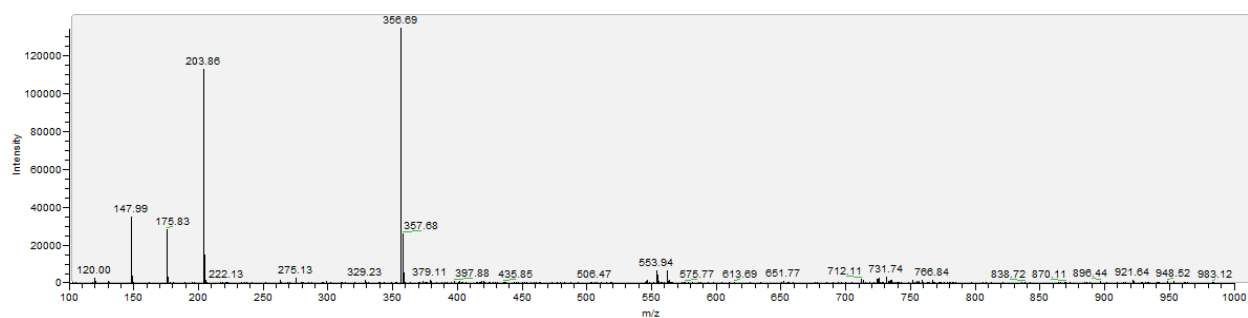

125

126 **Supplementary Figure 36: ESI MS spectrum of 7-2.**

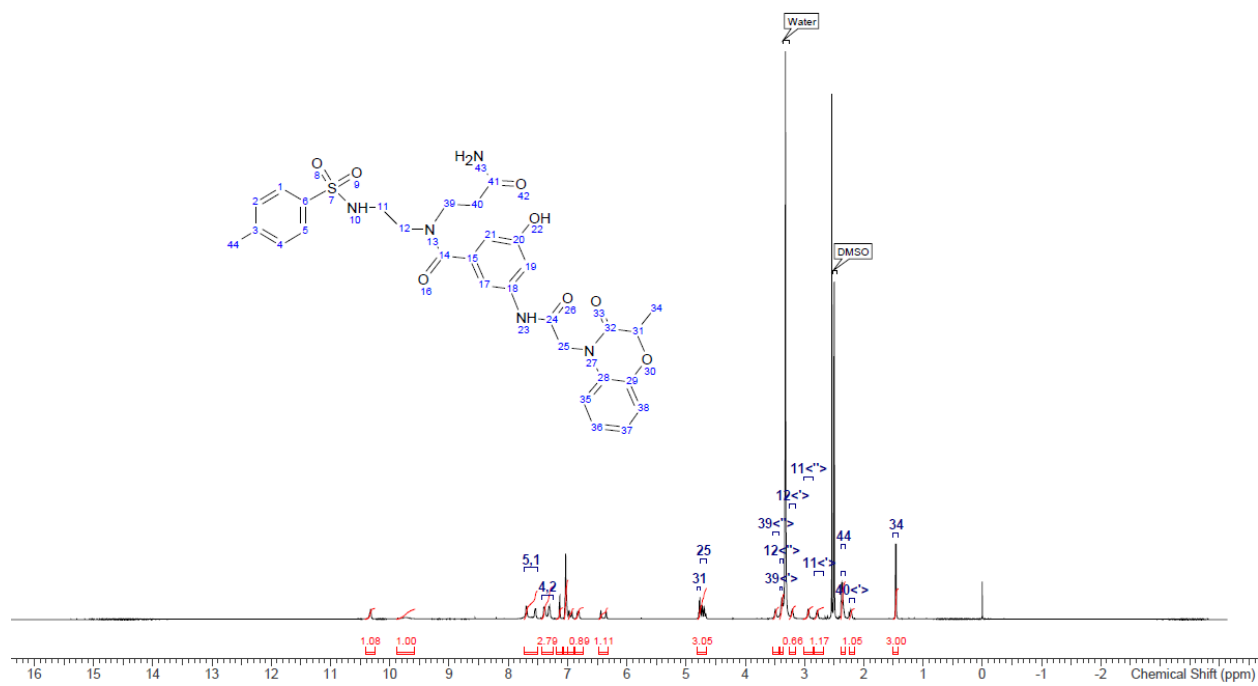

127

128 **Supplementary Figure 37:  $^1\text{H}$  NMR (DMSO- $d_6$ ) spectrum of 7.**

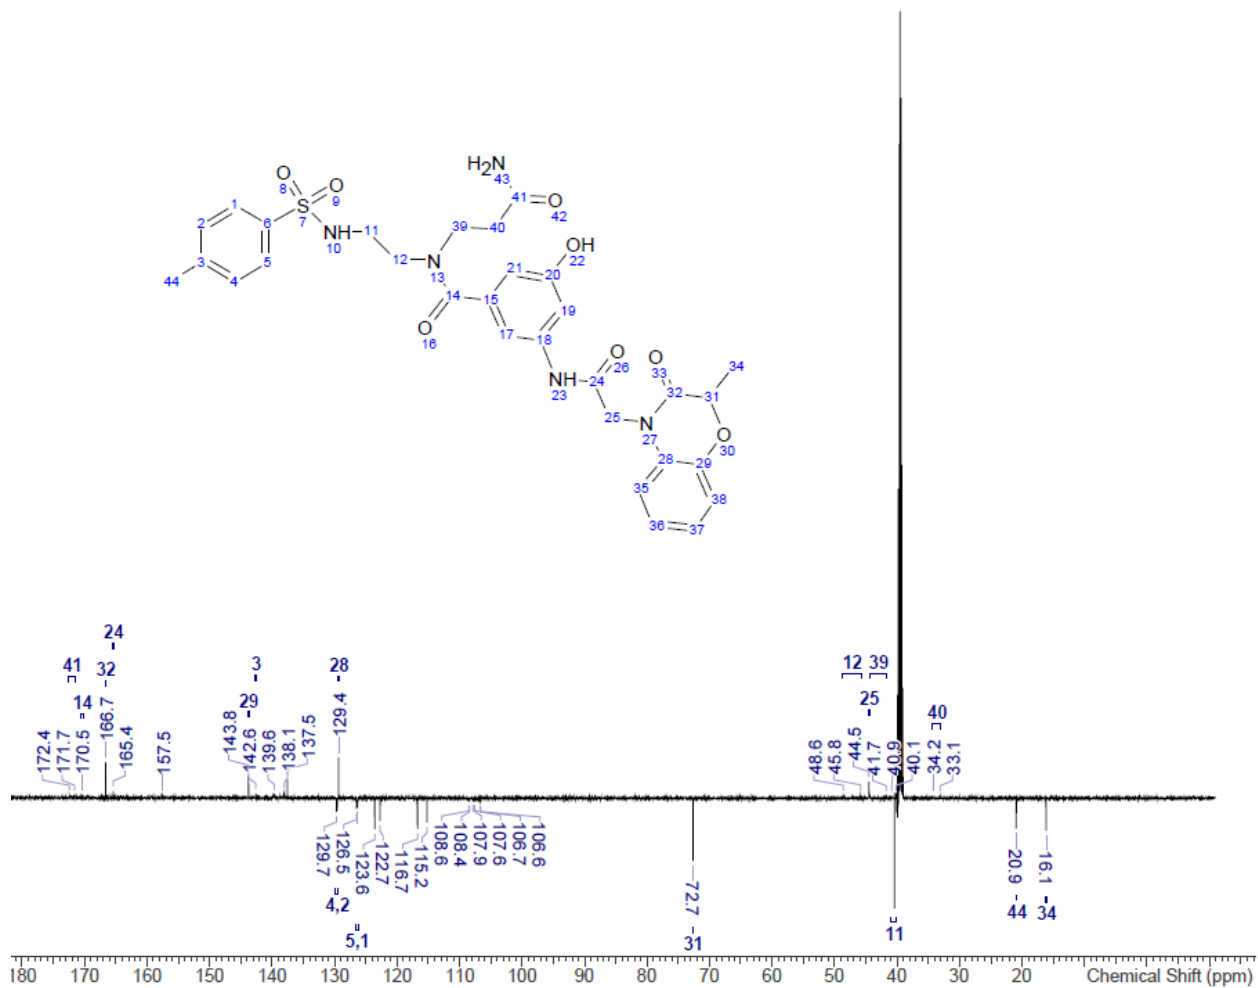

129

130 **Supplementary Figure 38: <sup>13</sup>C NMR (DMSO-d<sub>6</sub>) spectrum of 7.**

131

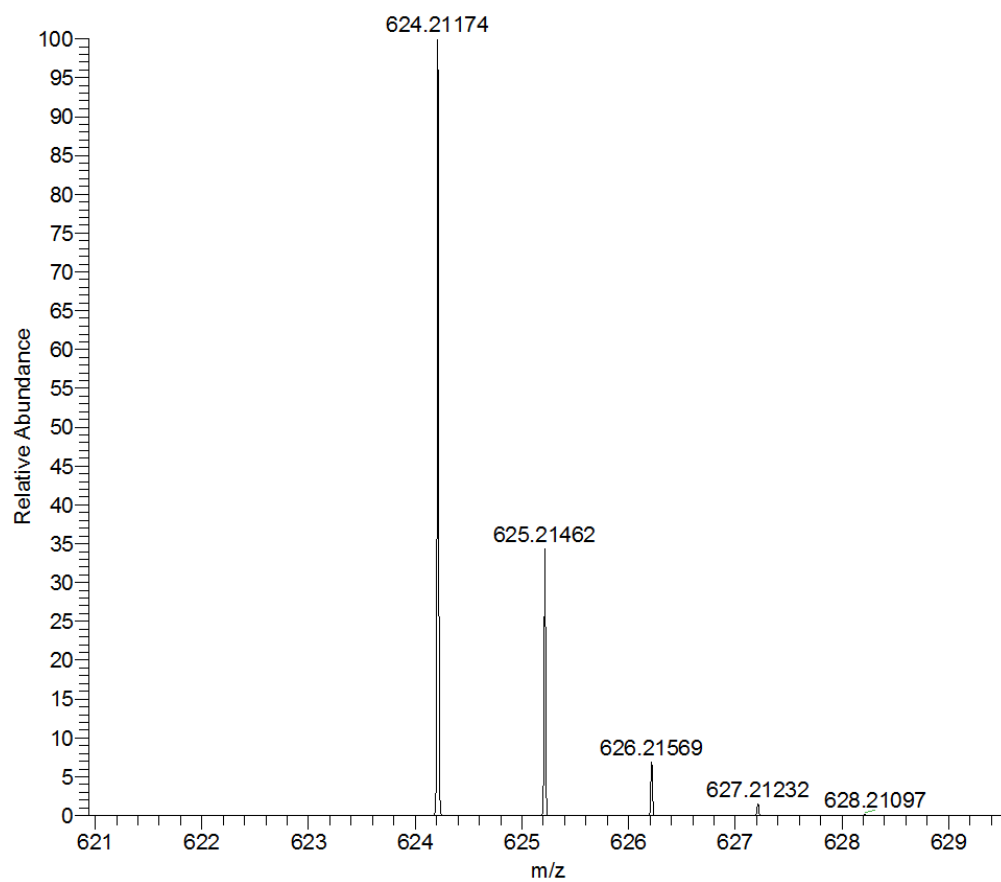

132

133 **Supplementary Figure 39: HRMS spectrum of 7.**

134



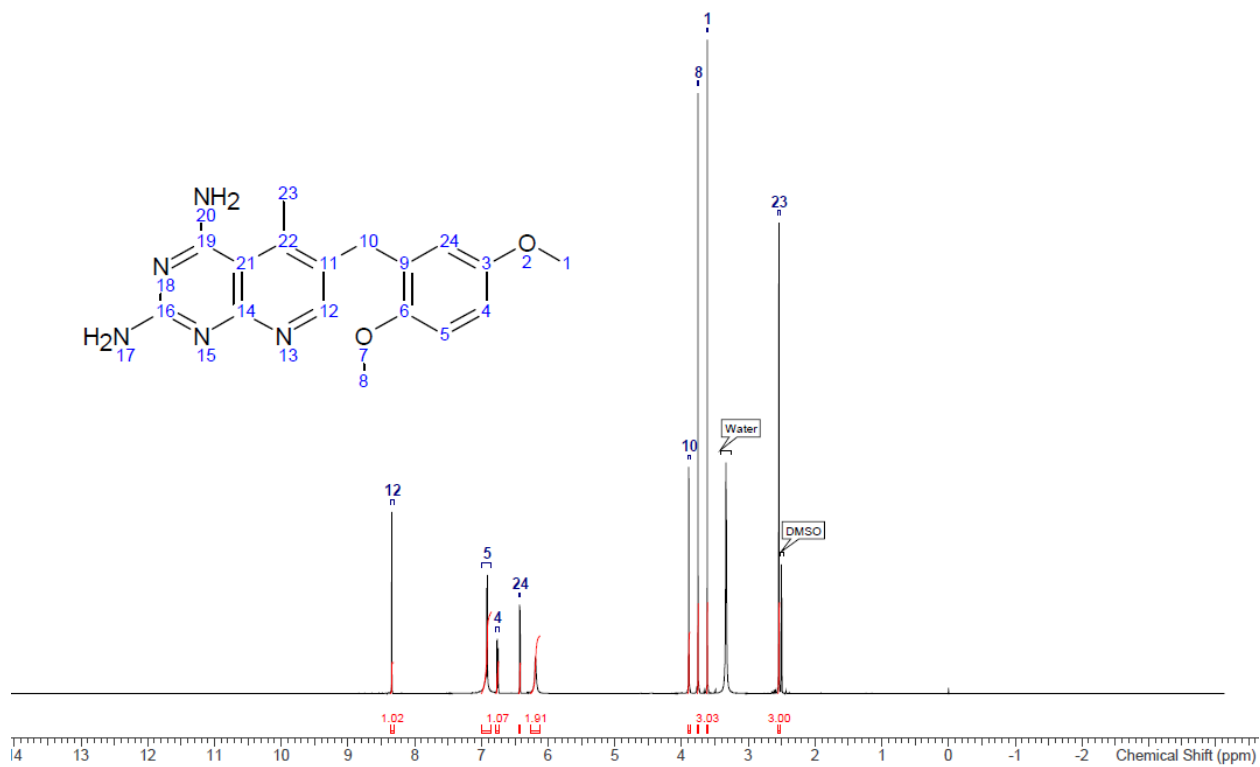

135

136 **Supplementary Figure 40: <sup>1</sup>H NMR (DMSO-d<sub>6</sub>) spectrum of 8.**

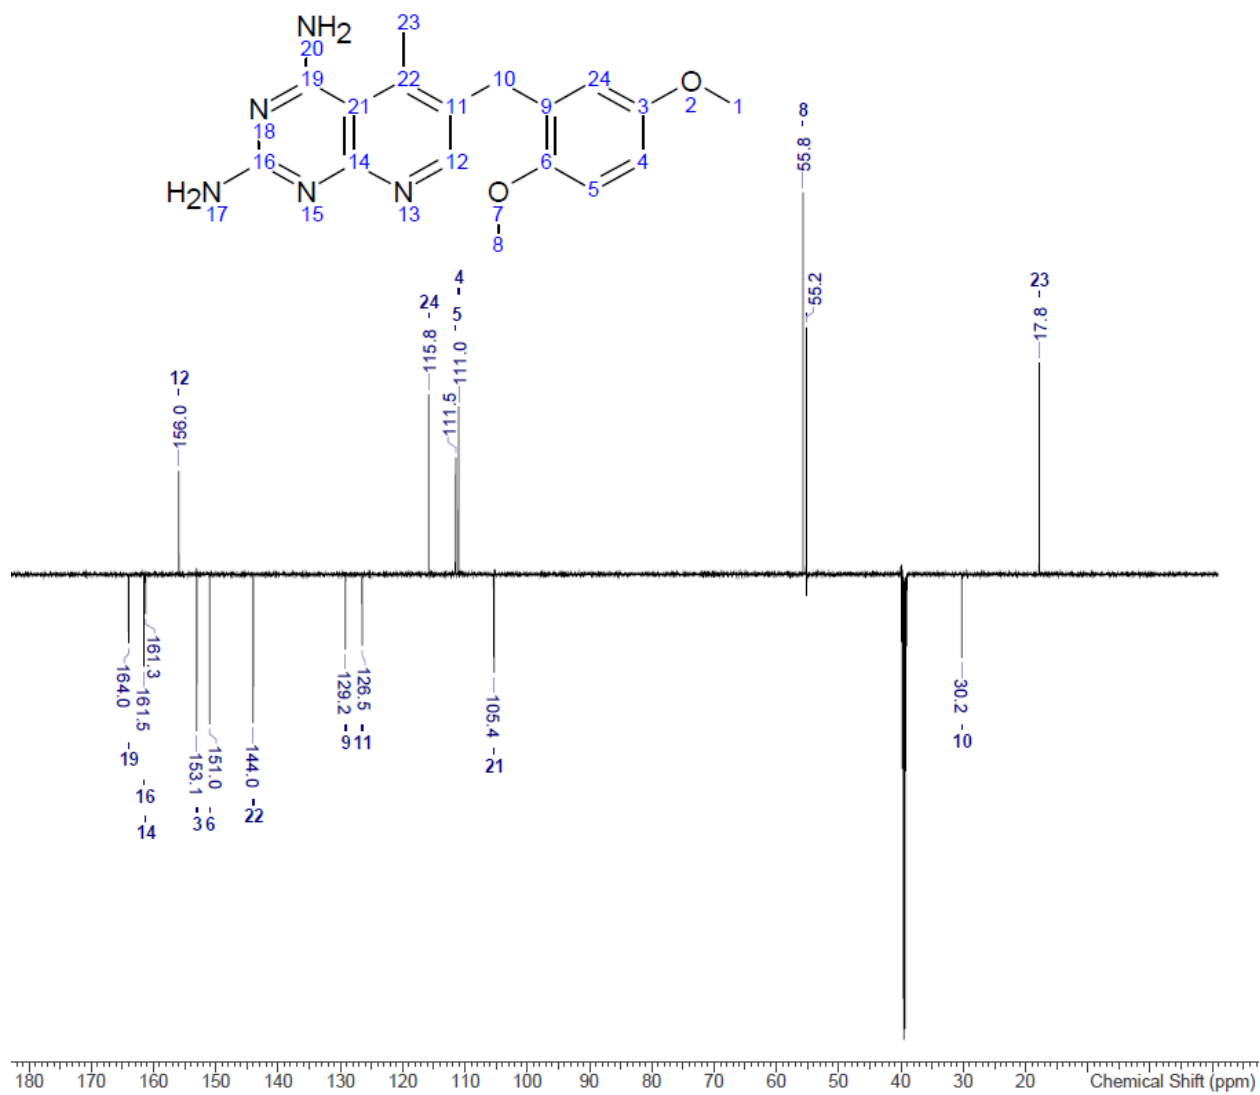

137

138 **Supplementary Figure 41: <sup>13</sup>C NMR (DMSO-d<sub>6</sub>) spectrum of 8.**

139

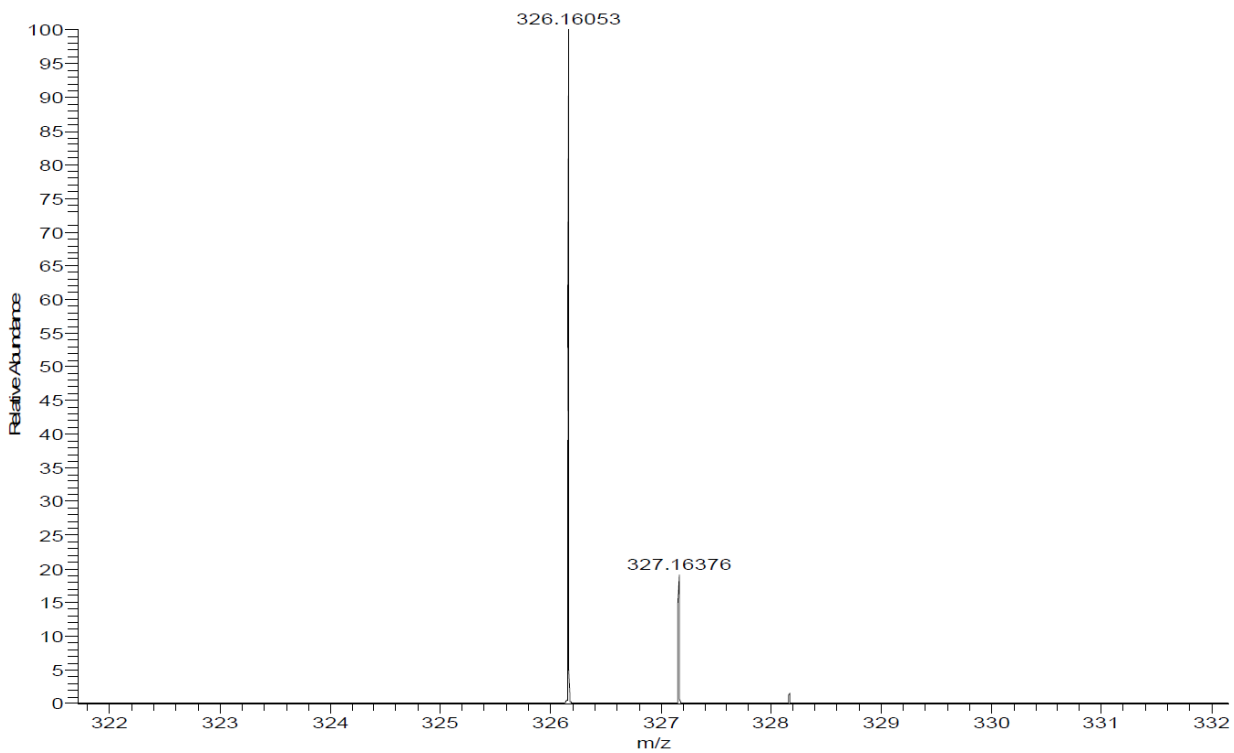

140

141 **Supplementary Figure 42: HRMS spectrum of 8.**

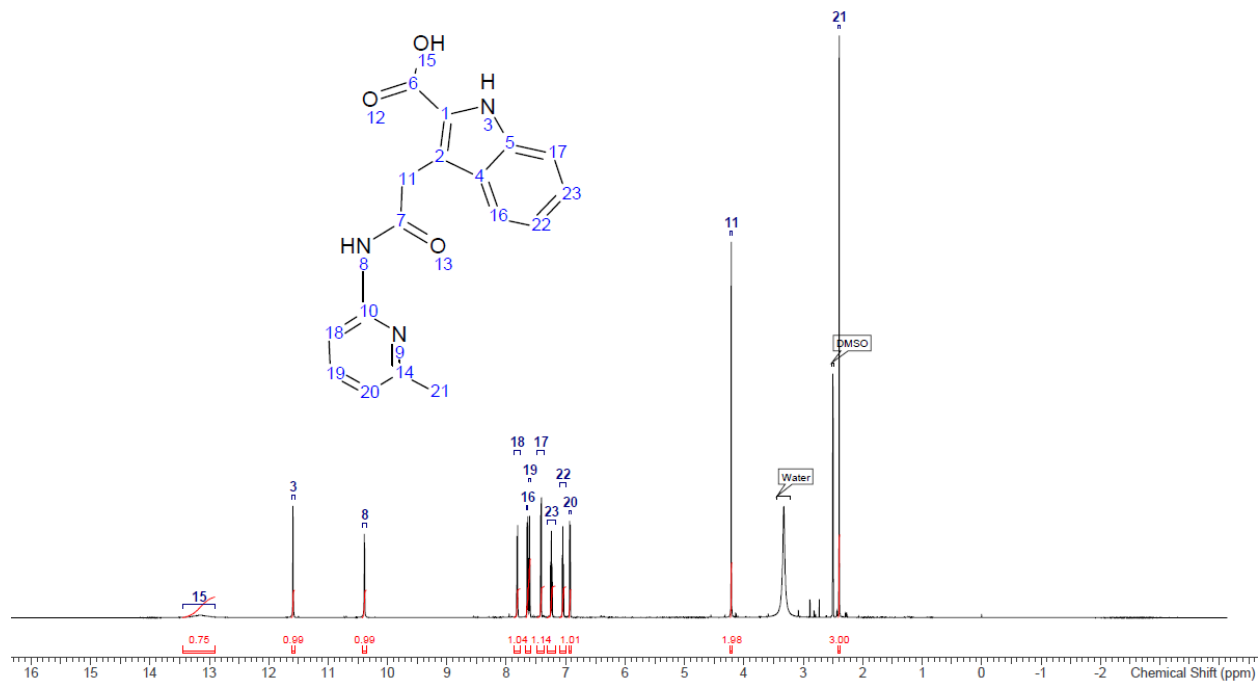

142

143 **Supplementary Figure 43: <sup>1</sup>H NMR (DMSO-d<sub>6</sub>) spectrum of 9.**

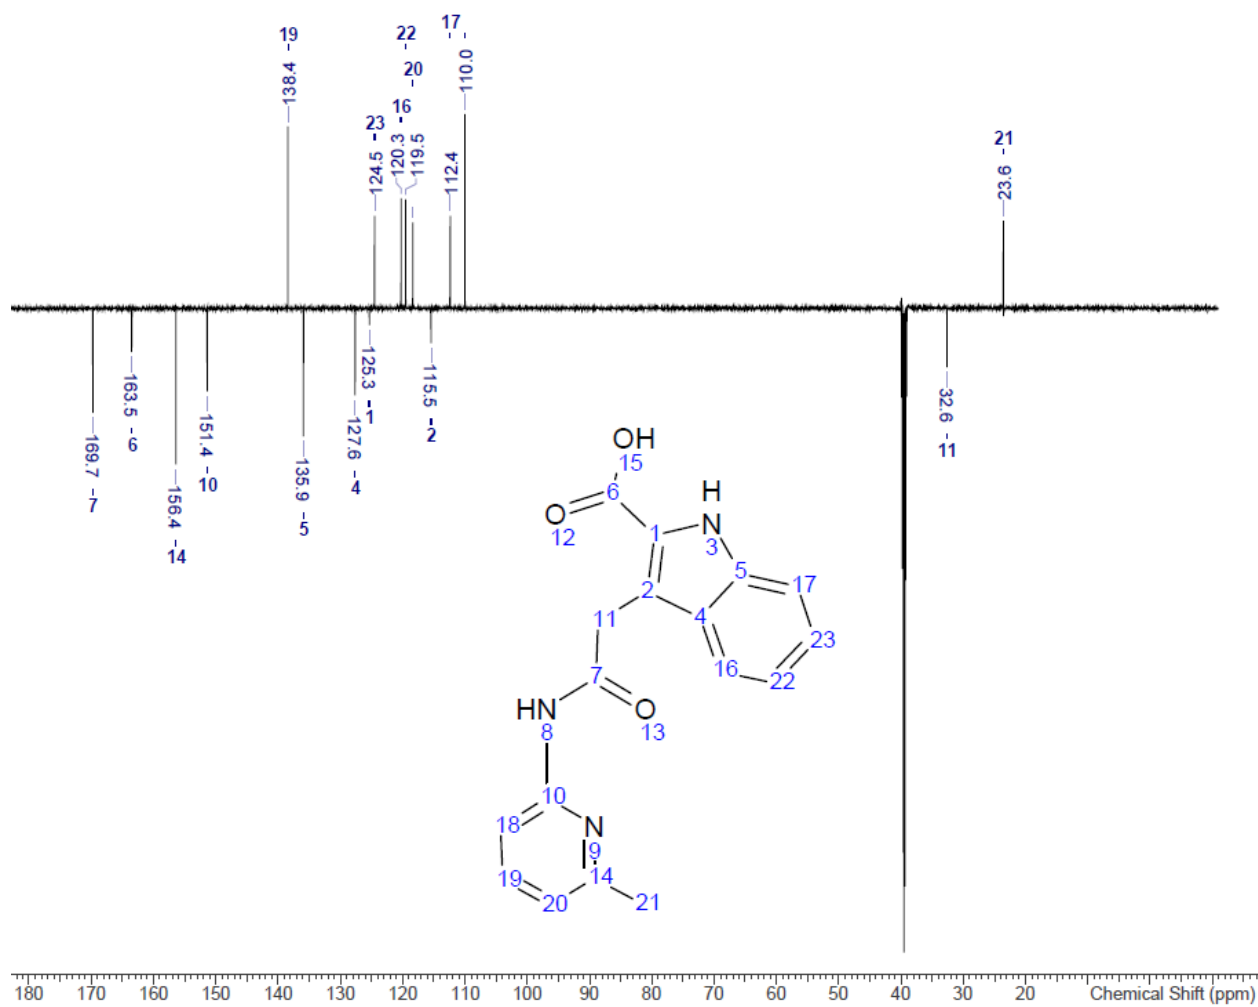

144

145 **Supplementary Figure 44:  $^{13}\text{C}$  NMR ( $\text{DMSO-d}_6$ ) spectrum of 9.**

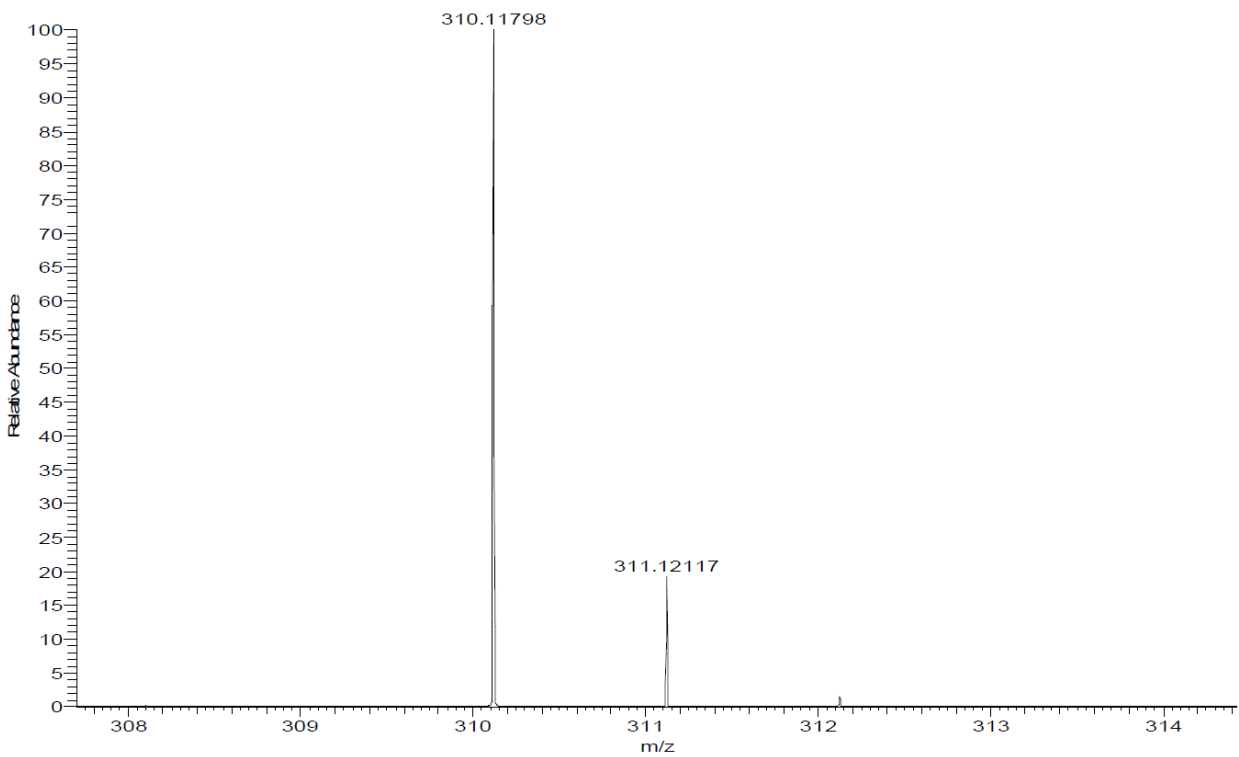

146

147 **Supplementary Figure 45: HRMS spectrum of 9.**

148

149

150

151

152

153

154

155

156

157

158

159

160

161

162

163

164

165

166

167

168

169

170

171

172 **Supplementary Tables:**

173

174 **Supplementary Table 1: Progression of targets through tractability assessment process.**

| Gene                                   | Protein                                                                                              | ELT signal | Off-DNA synthesis | Discovered       |     | MoA | Compound Disclosed |
|----------------------------------------|------------------------------------------------------------------------------------------------------|------------|-------------------|------------------|-----|-----|--------------------|
|                                        |                                                                                                      |            |                   | IC <sub>50</sub> | MIC |     |                    |
| <b>A) <i>Staphylococcus aureus</i></b> |                                                                                                      |            |                   |                  |     |     |                    |
| <i>accD/A</i>                          | Acetyl Co-A carboxylase (ACC)                                                                        | Y          | Y                 | Y                |     |     |                    |
| <i>acpS</i>                            | Holo-[acyl-carrier protein] synthase (AcpS)                                                          | Y          | Y                 |                  |     |     |                    |
| <i>alas</i>                            | Alanyl-tRNA synthetase (ARS)                                                                         |            |                   |                  |     |     |                    |
| <i>birA</i>                            | Bifunctional biotin-[acetylCoA carboxylase] holoenzyme synthetase (BirA)                             |            |                   |                  |     |     |                    |
| <i>cysS</i>                            | Cysteinyl-tRNA synthetase (CRS)                                                                      |            |                   |                  |     |     |                    |
| <i>dnaB</i>                            | Replicative DNA helicase (DnaB)                                                                      |            |                   |                  |     |     |                    |
| <i>dnaE</i>                            | DNA polymerase III alpha subunit (DnaE)                                                              |            |                   |                  |     |     |                    |
| <i>asps</i>                            | Aspartyl-tRNA synthetase (DRS)                                                                       |            |                   |                  |     |     |                    |
| <i>gltX</i>                            | Glutamyl-tRNA synthetase (ERS)                                                                       |            |                   |                  |     |     |                    |
| <i>fabG</i>                            | 3-oxoacyl-[acyl-carrier-protein] reductase (FabG)                                                    |            |                   |                  |     |     |                    |
| <i>fabH</i>                            | 3-oxoacyl-(acyl carrier protein) synthase III (FabH)                                                 |            |                   |                  |     |     |                    |
| <i>pheS/T</i>                          | Phenylalanyl-tRNA synthetase (FRS)                                                                   |            |                   |                  |     |     |                    |
| <i>glum</i>                            | N-acetyl glucosamine-1-phosphate uridyltransferase/glucosamine-1-phosphate acetyl transferase (GlmU) |            |                   |                  |     |     |                    |
| <i>glyS</i>                            | Glycyl-tRNA synthetase (GRS)                                                                         |            |                   |                  |     |     |                    |
| <i>Hiss</i>                            | Histidyl-tRNA synthetase (HRS)                                                                       | Y          | Y                 |                  |     |     |                    |
| <i>ileS</i>                            | Isoleucyl-tRNA synthetase (IRS)                                                                      | Y          | Y                 | Y                | Y   |     | Y                  |
| <i>lysS</i>                            | Lysyl-tRNA synthetase (KRS)                                                                          | Y          | Y                 |                  |     |     |                    |
| <i>spsB</i>                            | Signal peptidase Ib (SpsB)                                                                           |            |                   |                  |     |     |                    |
| <i>leuS</i>                            | Leucyl-tRNA synthetase (LRS)                                                                         |            |                   |                  |     |     |                    |
| <i>Map</i>                             | Methionine aminopeptidase (MetAP)                                                                    | Y          | Y                 | Y                |     |     | Y                  |
| <i>metS</i>                            | Methionyl-tRNA synthetase (MRS)                                                                      | Y          | Y                 | Y                | Y   | Y   | Y                  |
| <i>murA</i>                            | UDP-N-acetylglucosamine 1-carboxyvinyltransferase (MurA)                                             | Y          | Y                 |                  |     |     |                    |
| <i>murB</i>                            | UDP-N-acetylenolpyruvoylglucosamine reductase (MurB)                                                 |            |                   |                  |     |     |                    |

| Gene                                     | Protein                                                                         | ELT signal | Off-DNA synthesis | Discovered active series |          |          | Compound Disclosed |
|------------------------------------------|---------------------------------------------------------------------------------|------------|-------------------|--------------------------|----------|----------|--------------------|
|                                          |                                                                                 |            |                   | IC <sub>50</sub>         | MIC      | MoA      |                    |
| <i>murC</i>                              | UDP-N-acetylmuramate:L-alanine ligase (MurC)                                    |            |                   |                          |          |          |                    |
| <i>asnS</i>                              | Asparaginyl-tRNA synthetase (NRS)                                               | Y          | Y                 |                          |          |          |                    |
| <i>PBP-2'</i>                            | Penicillin-binding protein-2' (PBP-2')                                          |            |                   |                          |          |          |                    |
| <i>Def</i>                               | Peptidyl deformylase (PDF)                                                      |            |                   |                          |          |          |                    |
| <i>coaD</i>                              | Phosphopantetheine adenylyltransferase (PPAT)                                   | Y          | Y                 |                          |          |          |                    |
| <i>pros</i>                              | Prolyl-tRNA synthetase (PRS)                                                    |            |                   |                          |          |          |                    |
| <i>Pth</i>                               | Peptidyl-tRNA hydrolase (Pth)                                                   | Y          | Y                 | Y                        |          |          |                    |
| <i>pyrH</i>                              | Uridylate kinase (PyrH)                                                         | Y          | Y                 | Y                        |          |          |                    |
| <i>RNAP</i>                              | RNA polymerase (RNAP)                                                           |            |                   |                          |          |          |                    |
| <i>rnpA</i>                              | ribonuclease P protein component (Rnase-P)                                      |            |                   |                          |          |          |                    |
| <i>serS</i>                              | seryl-tRNA synthetase (SRS)                                                     |            |                   |                          |          |          |                    |
| <i>thrS</i>                              | threonyl-tRNA synthetase (TRS)                                                  |            |                   |                          |          |          |                    |
| <i>Upps</i>                              | Undecaprenyl pyrophosphate synthetase Upps                                      | Y          | Y                 | Y                        | Y        | Y        | Y <sup>a</sup>     |
| <i>valS</i>                              | Valyl-tRNA synthetase (VRS)                                                     |            |                   |                          |          |          |                    |
| <i>trpS</i>                              | Tryptophanyl-tRNA synthetase (WRS)                                              | Y          | Y                 |                          |          |          |                    |
| <i>tyrS</i>                              | Tyrosyl-tRNA synthetase (YRS)                                                   |            |                   |                          |          |          |                    |
|                                          | <b>Total</b>                                                                    | <b>14</b>  | <b>14</b>         | <b>7</b>                 | <b>3</b> | <b>2</b> | <b>4</b>           |
| <b>B) <i>Acinetobacter baumannii</i></b> |                                                                                 |            |                   |                          |          |          |                    |
| <i>acpP</i>                              | Acyl carrier protein (AcpP)                                                     | Y          | <sup>b</sup>      |                          | Y        |          |                    |
| <i>bamA</i>                              | Outer membrane protein assembly factor BamA β-barrel assembly machinery (BamA)  | Y          |                   |                          |          |          |                    |
| <i>bamD</i>                              | Outer membrane protein assembly factor BamD/ β-barrel assembly machinery (BamD) | Y          |                   |                          |          |          |                    |
| <i>birA</i>                              | Bifunctional biotin-[acetylCoA carboxylase] holoenzyme synthetase (BirA)        | Y          | Y                 |                          |          |          |                    |
| <i>cca</i>                               | tRNA nucleotidyltransferase (CCA)                                               | Y          | Y                 |                          | Y        |          |                    |
| <i>cdsA</i>                              | Phosphatidate cytidyltransferase (CdsA)                                         |            |                   |                          |          |          |                    |
| <i>dacC</i>                              | Penicillin-binding protein 5 (DacC)                                             | Y          |                   |                          |          |          |                    |
| <i>ddlB</i>                              | D-alanine-D-alanine ligase B (DdlB)                                             |            |                   |                          |          |          |                    |
| <i>dnaB</i>                              | Replicative DNA helicase (DnaB)                                                 | Y          |                   |                          |          |          |                    |

| Gene        | Protein                                                                                            | ELT signal | Off-DNA synthesis | Discovered active series |     | MoA | Compound Disclosed |
|-------------|----------------------------------------------------------------------------------------------------|------------|-------------------|--------------------------|-----|-----|--------------------|
|             |                                                                                                    |            |                   | IC <sub>50</sub>         | MIC |     |                    |
| <i>dnaE</i> | DNA polymerase III alpha subunit (DnaE)                                                            | Y          |                   |                          |     |     |                    |
| <i>dnaG</i> | DNA primase (DnaG)                                                                                 | Y          |                   |                          |     |     |                    |
| <i>dnaX</i> | DNA polymerase III tau and gamma subunits (DnaX)                                                   | Y          |                   |                          |     |     |                    |
| <i>dxr</i>  | 1-deoxy-D-xylulose 5-phosphate reductoisomerase (DXR)                                              | Y          | Y                 | Y                        | Y   |     |                    |
| <i>dxs</i>  | 1-deoxyxylulose-5-phosphate synthase (DXS)                                                         | Y          | Y                 |                          |     | Y   |                    |
| <i>engA</i> | Putative GTP-binding protein (EngA)                                                                |            |                   |                          |     |     |                    |
| <i>engB</i> | Putative GTP-binding protein (EngB)                                                                | Y          |                   |                          |     |     |                    |
| <i>fabZ</i> | 3-hydroxyacyl-[acyl-carrier-protein] dehydratase (FabZ)                                            | Y          | Y                 |                          |     | Y   |                    |
| <i>ftsH</i> | cell division ATP-dependent metalloprotease (FtsH)                                                 | Y          |                   |                          |     |     |                    |
| <i>ftsI</i> | transpeptidase involved in septal peptidoglycan synthesis / penicillin-binding protein 3 (FtsI)    | Y          | Y                 |                          |     | Y   |                    |
| <i>gcp</i>  | putative O-sialoglycoprotein endopeptidase Gcp                                                     |            |                   |                          |     |     |                    |
| <i>glmM</i> | phosphoglucosamine mutase GlmM                                                                     | Y          |                   |                          |     |     |                    |
| <i>glmS</i> | Glucosamine--fructose-6-phosphate aminotransferase GlmS                                            | Y          |                   |                          |     |     |                    |
| <i>glmU</i> | N-acetyl glucosamine-1-phosphate uridyltransferase/glucosamine-1-phosphate acetyl transferase GlmU |            |                   |                          |     |     |                    |
| <i>grpE</i> | heat shock protein 24 nucleotide exchange factor/heat shock protein GrpE                           |            |                   |                          |     |     |                    |
| <i>guaB</i> | inositol-5-monophosphate dehydrogenase (GuaB)                                                      |            |                   |                          |     |     |                    |
| <i>ispA</i> | Farnesyl diphosphate synthase (IspA)                                                               | Y          |                   |                          |     |     |                    |
| <i>ispB</i> | Octaprenyl diphosphate synthase (IspB)                                                             | Y          |                   |                          |     |     |                    |
| <i>ispD</i> | 4-diphosphocytidyl-2-C-methyl-D-erythritol synthase (IspD)                                         | Y          |                   |                          |     |     |                    |
| <i>ispF</i> | 2-C-methyl-D-erythritol 2,4-cyclodiphosphate synthase (IspF)                                       | Y          | Y                 |                          |     | Y   |                    |



| Gene        | Protein                                                                     | ELT signal | Off-DNA synthesis | Discovered active series |     | MoA | Compound Disclosed |
|-------------|-----------------------------------------------------------------------------|------------|-------------------|--------------------------|-----|-----|--------------------|
|             |                                                                             |            |                   | IC <sub>50</sub>         | MIC |     |                    |
| <i>ispG</i> | 4-hydroxy-3-methylbut-2-en-1-yl diphosphate synthase (IspG)                 | Y          | Y                 |                          | Y   |     |                    |
| <i>ispH</i> | 4-hydroxy-3-methylbut-2-enyl diphosphate reductase (IspH)                   | Y          |                   |                          |     |     |                    |
| <i>kdtA</i> | 3-deoxy-D-manno-2-octulosonate transferase (KdtA)                           |            |                   |                          |     |     |                    |
| <i>lepB</i> | Signal peptidase I (LepB)                                                   | Y          |                   |                          |     |     |                    |
| <i>lolA</i> | Outer membrane lipoproteins carrier protein (LolA)                          | Y          | Y                 |                          | Y   | Y   | Y                  |
| <i>lolB</i> | Outer membrane lipoprotein required for localization of lipoproteins (LolB) |            |                   |                          |     |     |                    |
| <i>lolD</i> | Lipoprotein releasing system ATP-binding protein (LolD)                     |            |                   |                          |     |     |                    |
| <i>lptA</i> | Periplasmic LPS-binding protein (LptA)                                      |            |                   |                          |     |     |                    |
| <i>lptB</i> | ABC transporter ATP-binding protein (LptB)                                  |            |                   |                          |     |     |                    |
| <i>lpxA</i> | UDP-acetylglucosamine acyltransferase (LpxA)                                | Y          | Y                 |                          | Y   | Y   | Y                  |
| <i>lpxB</i> | Lipid A-disaccharide synthase (LpxB)                                        | Y          |                   |                          |     |     |                    |
| <i>lpxD</i> | UDP-3-O-[3-hydroxy-lauroyl] glucosamine N-acyltransferase (LpxD)            | Y          | Y                 |                          | Y   |     |                    |
| <i>lpxH</i> | UDP-2,3-diacylglucosamine hydrolase (LpxH)                                  | Y          | Y                 |                          |     |     |                    |
| <i>lpxK</i> | Tetraacyldisaccharide 4'-kinase /Lipid A 4'-kinase) (LpxK)                  | Y          |                   |                          |     |     |                    |
| <i>map</i>  | Methionine aminopeptidase (MetAP)                                           | Y          |                   |                          |     |     |                    |
| <i>metK</i> | S-adenosylmethionine synthetase (MetK)                                      | Y          |                   |                          |     |     |                    |
| <i>mraY</i> | Phospho-N-acetylmuramoyl-pentapeptide transferase (MraY)                    |            |                   |                          |     |     |                    |
| <i>mrcB</i> | PBP1b, transglycosylase and transpeptidase (MrcB)                           | Y          | Y                 |                          | Y   |     |                    |
| <i>msbA</i> | Lipid A export ATP-binding/permease protein (MsbA)                          |            |                   |                          |     |     |                    |
| <i>mtgA</i> | Monofunctional biosynthetic peptidoglycan transglycosylase (MtgA)           |            |                   |                          |     |     |                    |
| <i>murA</i> | UDP-N-acetylglucosamine 1-carboxyvinyltransferase (MurA)                    | Y          |                   |                          |     |     |                    |

| Gene        | Protein                                                                                                                    | ELT signal | Off-DNA synthesis | Discovered active series |     | MoA | Compound Disclosed |
|-------------|----------------------------------------------------------------------------------------------------------------------------|------------|-------------------|--------------------------|-----|-----|--------------------|
|             |                                                                                                                            |            |                   | IC <sub>50</sub>         | MIC |     |                    |
| <i>murB</i> | UDP-N-acetylenolpyruvoylglucosamine reductase (MurB)                                                                       | Y          |                   |                          |     |     |                    |
| <i>murC</i> | UDP-N-acetylmuramate-L-alanine ligase (MurC)                                                                               | Y          |                   |                          |     |     |                    |
| <i>murD</i> | UDP-N-acetylmuramoylalanine-D-glutamate ligase (MurD)                                                                      | Y          |                   |                          |     |     |                    |
| <i>murE</i> | UDP-N-acetylmuramoylalanyl-D-glutamate-2, 6-diaminopimelate ligase (MurE)                                                  | Y          |                   |                          |     |     |                    |
| <i>murF</i> | UDP-N-acetylmuramoyl-tripeptide-D-alanyl-D-alanine ligase (MurF)                                                           | Y          |                   |                          |     |     |                    |
| <i>murG</i> | UDP-N-acetylglucosamine--N-acetylmuramyl-(Pentapeptide) pyrophosphoryl-undecaprenol N-acetylglucosamine transferase (MurG) | Y          | Y                 |                          | Y   |     |                    |
| <i>murI</i> | Glutamate racemase (MurI)                                                                                                  | Y          |                   |                          |     |     |                    |
| <i>murJ</i> | Probable peptidoglycan lipid II flippase (MurJ)                                                                            |            |                   |                          |     |     |                    |
| <i>nrdA</i> | Ribonucleoside diphosphate reductase, alpha subunit (NrdA)                                                                 | Y          |                   |                          |     |     |                    |
| <i>nrdB</i> | Ribonucleoside-diphosphate reductase, beta subunit (NrdB)                                                                  |            |                   |                          |     |     |                    |
| <i>obgE</i> | putative GTP-binding protein (ObgE)                                                                                        | Y          |                   |                          |     |     |                    |
| <i>pbpA</i> | Penicillin-binding protein 2 (PbpA)                                                                                        | Y          | Y                 |                          | Y   |     |                    |
| <i>pgsA</i> | CDP-diacylglycerol--glycerol-3-phosphate 3-phosphatidyltransferase (PgsA)                                                  |            |                   |                          |     |     |                    |
| <i>ponA</i> | PBP1a, transglycosylase and transpeptidase (PonA)                                                                          |            |                   |                          |     |     |                    |
| <i>prfB</i> | Peptide chain release factor 2 (PrfB)                                                                                      | Y          |                   |                          |     |     |                    |
| <i>pth</i>  | Peptidyl-tRNA hydrolase (Pth)                                                                                              | Y          | Y                 |                          | Y   |     |                    |
| <i>pyrH</i> | Uridylate kinase (PyrH)                                                                                                    | Y          |                   |                          |     |     |                    |
| <i>rho</i>  | Transcription termination factor (Rho)                                                                                     | Y          |                   |                          |     |     |                    |
| <i>rnpA</i> | Ribonuclease P protein component (RnpA)                                                                                    | Y          |                   |                          |     |     |                    |
| <i>thyA</i> | Thymidylate synthase (ThyA)                                                                                                | Y          | Y                 |                          | Y   |     |                    |
| <i>uppS</i> | Undecaprenyl pyrophosphate synthetase (UppS)                                                                               | Y          | Y                 | Y                        | Y   | Y   | Y                  |

| Gene                                        | Protein                                                                                                                                | ELT signal | Off-DNA synthesis | Discovered active series |     | MoA | Compound Disclosed |
|---------------------------------------------|----------------------------------------------------------------------------------------------------------------------------------------|------------|-------------------|--------------------------|-----|-----|--------------------|
|                                             |                                                                                                                                        |            |                   | IC <sub>50</sub>         | MIC |     |                    |
|                                             |                                                                                                                                        | Total      | 52                | 18                       | 2   | 17  | 3                  |
| <b>C) <i>Mycobacterium tuberculosis</i></b> |                                                                                                                                        |            |                   |                          |     |     |                    |
| <i>accA3</i>                                | bifunctional acetyl-/propionyl-coenzyme A carboxylase alpha chain (AccA3): biotin carboxylase + biotin carboxyl carrier protein (BCCP) | Y          | Y                 |                          |     |     |                    |
| <i>accD4</i>                                | Propionyl-CoA carboxylase beta chain 4 AccD4                                                                                           | Y          | Y                 |                          |     |     |                    |
| <i>accD5</i>                                | Propionyl-CoA carboxylase beta chain 5 AccD5                                                                                           | Y          | Y                 |                          |     |     |                    |
| <i>accD6</i>                                | Acetyl/propionyl-CoA carboxylase (beta subunit) AccD6                                                                                  | Y          |                   |                          |     |     |                    |
| <i>aftA</i>                                 | Arabinofuranosyltransferase (AftA)                                                                                                     | Y          |                   |                          |     |     |                    |
| <i>aspS</i>                                 | Aspartyl-tRNA synthetase (AspS)                                                                                                        | Y          |                   |                          |     |     |                    |
| <i>birA</i>                                 | Bifunctional biotin operon repressor and biotin--[acetyl-CoA-carboxylase] synthetase (BirA)                                            |            |                   |                          |     |     |                    |
| <i>dapE</i>                                 | Probable succinyl-diaminopimelate desuccinylase (DapE)                                                                                 |            |                   |                          |     |     |                    |
| <i>dapF</i>                                 | Diaminopimelate epimerase (DapF)                                                                                                       |            |                   |                          |     |     |                    |
| <i>dxr</i>                                  | 1-deoxy-D-xylulose 5-phosphate reductoisomerase (DXR)                                                                                  | Y          | Y                 | Y                        |     |     |                    |
| <i>dfrA</i>                                 | Dihydrofolate reductase DfrA (DHFR)                                                                                                    | Y          | Y                 | Y                        |     |     | Y                  |
| <i>echA6</i>                                | Enoyl-CoA hydratase (EchA6)                                                                                                            | Y          | Y                 |                          |     |     |                    |
| <i>egtD</i>                                 | Histidine-specific methyltransferase (EgtD/ Rv3701c)                                                                                   |            |                   |                          |     |     |                    |
| <i>embB</i>                                 | Integral membrane indolylacetylinsitol arabinosyltransferase EmbB (arabinosylindolylacetylinsitol synthase)                            |            |                   |                          |     |     |                    |
| <i>embC</i>                                 | Integral membrane indolylacetylinsitol arabinosyltransferase EmbC (arabinosylindolylacetylinsitol synthase)                            |            |                   |                          |     |     |                    |
| <i>fasR</i>                                 | fatty acid synthesis Regulator (FasR)                                                                                                  | Y          |                   |                          |     |     |                    |
| <i>fbpA</i>                                 | Secreted antigen 85-a FbpA (mycolyl transferase 85A) (fibronectin-binding protein A) (antigen 85 complex A)                            | Y          | Y                 |                          |     |     |                    |

| Gene         | Protein                                                                                                                   | ELT signal | Off-DNA synthesis | Discovered active series |     | MoA | Compound Disclosed |
|--------------|---------------------------------------------------------------------------------------------------------------------------|------------|-------------------|--------------------------|-----|-----|--------------------|
|              |                                                                                                                           |            |                   | IC <sub>50</sub>         | MIC |     |                    |
| <i>fbpC2</i> | Secreted antigen 85-C FbpC (85C) (antigen 85 complex C) (AG58C) (mycolyl transferase 85C) (fibronectin-binding protein C) | Y          | Y                 |                          |     |     |                    |
| <i>glfT2</i> | Bifunctional UDP-galactofuranosyl transferase (GlfT2)                                                                     | Y          |                   |                          |     |     |                    |
| <i>glmU</i>  | UDP-N-acetylglucosamine pyrophosphorylase (GlmU)                                                                          | Y          |                   |                          |     |     |                    |
| <i>guaB2</i> | Inosine-5'-monophosphate dehydrogenase (GuaB2)                                                                            |            |                   |                          |     |     |                    |
| <i>inhA</i>  | InhA control                                                                                                              | Y          |                   |                          |     |     |                    |
| <i>kasA</i>  | 3-oxoacyl-[acyl-carrier protein] synthase 1 KasA (beta-ketoacyl-ACP synthase)                                             | Y          | Y                 | Y                        |     |     |                    |
| <i>kasB</i>  | 3-oxoacyl-[acyl-carrier protein] synthase 2 KasB (beta-ketoacyl-ACP synthase)                                             |            |                   |                          |     |     |                    |
| <i>leuS</i>  | Leucyl-tRNA synthetase (LeuS)                                                                                             |            |                   |                          |     |     |                    |
| <i>lpdC</i>  | Dihydrolipoamide dehydrogenase (LpdC)                                                                                     | Y          | Y                 | Y                        |     |     |                    |
| <i>mabR</i>  | Mycolic acid biosynthesis regulator (MabR/ Rv2242)                                                                        | Y          | Y                 |                          |     |     |                    |
| <i>mapA</i>  | Methionine aminopeptidase MapA (MetAP)                                                                                    | Y          |                   |                          |     |     |                    |
| <i>mapB</i>  | Methionine aminopeptidase MapB                                                                                            |            |                   |                          |     |     |                    |
| <i>murC</i>  | UDP-N-acetylmuramate-alanine ligase (MurC)                                                                                |            |                   |                          |     |     |                    |
| <i>murI</i>  | Glutamate racemase (MurI)                                                                                                 | Y          |                   |                          |     |     |                    |
| <i>panC</i>  | Pantothenate synthetase (PanC)                                                                                            | Y          |                   |                          |     |     |                    |
| <i>pimB</i>  | Mannosyltransferase (PimB)                                                                                                |            |                   |                          |     |     |                    |
| <i>pknB</i>  | Serine/threonine-protein kinase B (PknB)                                                                                  | Y          |                   |                          |     |     |                    |
| <i>pks13</i> | Polyketide synthase (Pks13)                                                                                               | Y          |                   |                          |     |     |                    |
| <i>ppm1</i>  | Polyprenol-monophosphomannose synthase (Ppm1)                                                                             |            |                   |                          |     |     |                    |
| <i>MptpA</i> | Mycobacterial Phosphotyrosine protein phosphatase (PtpA)                                                                  | Y          | Y                 |                          |     |     |                    |

| Gene          | Protein                                                  | ELT signal | Off-DNA synthesis | Discovered active series |          | MoA      | Compound Disclosed |
|---------------|----------------------------------------------------------|------------|-------------------|--------------------------|----------|----------|--------------------|
|               |                                                          |            |                   | IC <sub>50</sub>         | MIC      |          |                    |
| <i>MptpB</i>  | Mycobacterial Phosphotyrosine protein phosphatase (PtpB) | Y          | Y                 |                          |          |          |                    |
| <i>Rv3267</i> | Conserved protein (CPSA-related protein) Rv3267          | Y          |                   |                          |          |          |                    |
| <i>sahH</i>   | Adenosylhomocysteinase (SahH)                            |            |                   |                          |          |          |                    |
| <i>topA</i>   | DNA topoisomerase I (TopA)                               | Y          |                   |                          |          |          |                    |
| <i>trxB2</i>  | Thioredoxin reductase (TrxB2)                            |            |                   |                          |          |          |                    |
| <i>trxC</i>   | Thioredoxin reductase (TrxC)                             | Y          |                   |                          |          |          |                    |
| <b>Total</b>  |                                                          | <b>27</b>  | <b>13</b>         | <b>4</b>                 | <b>-</b> | <b>-</b> | <b>1</b>           |

175 This table shows the detailed progression of individual targets for each screening campaign. The column  
176 headers are described as follows. ELT signal: target had specific binders from ELT screen; Prioritized for  
177 off-DNA synthesis: target was chosen for follow-up with chemistry efforts on 3-5 chemotypes;  
178 Discovered active series: target had compound with measurable activity (IC<sub>50</sub> measurement for *S. aureus*  
179 and *M. tuberculosis*, MIC measurement for *A.baumannii*); MoA: target where measured activity was  
180 demonstrated to be likely through the target. Targets that were not amenable to ELT screening in *A.*  
181 *baumannii* panel: *ffH*, *htrB*, *loIC*, *loIE*, *lptF*, *lptG*, *ostA*, *uppP*, *ybjG*.

182 a) Details of UppS screening are reported elsewhere<sup>6</sup>.

183 b) Compound found through similarity search against corporate collection.

184 c) InhA as a control target was not included in the count of total number of targets with ELT signal.

185

186

187

188

189

190

191

192

193

194

195 **Supplementary Table 2: Panel of bacterial strains used to test *A. baumannii* ELT hits.**

| Bacterial Strain                                                                                       | Description   | Compound MIC, µg/ml |                   |                |
|--------------------------------------------------------------------------------------------------------|---------------|---------------------|-------------------|----------------|
|                                                                                                        |               | 4                   | 5                 | 6              |
| <i>Escherichia coli</i> 7623 $\Delta$ tolC                                                             | Efflux mutant | >128                | >128              | >128           |
| <i>Klebsiella pneumoniae</i> 1161486a $\Delta$ tolC                                                    | Efflux mutant | >128                | >128              | >128           |
| <i>Pseudomonas aeruginosa</i> PA0322 $\Delta$ (mexAB-oprM) $\Delta$ (mexCD-oprJ) $\Delta$ (mexEF-oprN) | Efflux mutant | >128                | >128              | >128           |
| <i>Acinetobacter baumannii</i> BM4652 $\Delta$ adeABC $\Delta$ adeIJK                                  | Efflux mutant | >128                | >128              | >128           |
| <i>Acinetobacter baumannii</i> ATCC 19606-1 $\Delta$ LpxC                                              | LPS mutant    | >128                | ≤ 0.125           | 32             |
| <i>Haemophilus influenzae</i> H128 $\Delta$ acrB                                                       | Efflux mutant | NT                  | 1                 | 2 <sup>b</sup> |
| <i>Staphylococcus aureus</i> RN4220                                                                    | Gram-positive | >128                | >128 <sup>a</sup> | >128           |

Reported values were observed in a minimum of two replicate experiments.

a) *S. aureus* WCUH29, b) *H. influenzae*  $\Delta$ tolC

196

197

198 **Supplementary Table 3: Comparison of *S. aureus* targets screened by both ELT and HTS.**

| Gene          | Protein                                                                  | ELT Outcome                | HTS Outcome             |
|---------------|--------------------------------------------------------------------------|----------------------------|-------------------------|
| <i>accD/A</i> | Acetyl Co-A carboxylase (ACC)                                            | Prioritized <sup>a</sup>   | Hits found              |
| <i>Map</i>    | Methionine aminopeptidase (MetAP)                                        | Prioritized <sup>a</sup>   | Hits found              |
| <i>metS</i>   | Methionyl-tRNA synthetase (MRS)                                          | Prioritized <sup>a,b</sup> | Hits found <sup>b</sup> |
| <i>trpS</i>   | Tryptophanyl-tRNA synthetase (WRS)                                       | Prioritized                | Hits Found              |
| <i>Hiss</i>   | Histidyl-tRNA synthetase (HRS)                                           | Prioritized                | No Hits                 |
| <i>ileS</i>   | Isoleucyl-tRNA synthetase (IRS)                                          | Prioritized <sup>a</sup>   | No Hits                 |
| <i>lysS</i>   | Lysyl-tRNA synthetase (KRS)                                              | Prioritized                | No Hits                 |
| <i>asnS</i>   | Asparaginyl-tRNA synthetase (NRS)                                        | Prioritized                | No Hits                 |
| <i>Upps</i>   | Undecaprenyl pyrophosphate synthetase UppS                               | Prioritized <sup>a,b</sup> | No Hits                 |
| <i>Def</i>    | Peptidyl deformylase (PDF)                                               | No Signal                  | Hits Found <sup>b</sup> |
| <i>valS</i>   | Valyl-tRNA synthetase (VRS)                                              | No Signal                  | Hits Found <sup>b</sup> |
| <i>tyrS</i>   | Tyrosyl-tRNA synthetase (YRS)                                            | No Signal                  | Hits Found              |
| <i>Alas</i>   | Alanyl-tRNA synthetase (ARS)                                             | No Signal                  | No Hits                 |
| <i>birA</i>   | Bifunctional biotin-[acetylCoA carboxylase] holoenzyme synthetase (BirA) | No Signal                  | No Hits                 |
| <i>cysS</i>   | Cysteinyl-tRNA synthetase (CRS)                                          | No Signal                  | No Hits                 |

| Gene          | Protein                                                                                                      | ELT Outcome | HTS Outcome |
|---------------|--------------------------------------------------------------------------------------------------------------|-------------|-------------|
| <i>dnaB</i>   | Replicative DNA helicase (DnaB)                                                                              | No Signal   | No Hits     |
| <i>dnaE</i>   | DNA polymerase III alpha subunit (DnaE)                                                                      | No Signal   | No Hits     |
| <i>Asps</i>   | Aspartyl-tRNA synthetase (DRS)                                                                               | No Signal   | No Hits     |
| <i>gltX</i>   | Glutamyl-tRNA synthetase (ERS)                                                                               | No Signal   | No Hits     |
| <i>Glum</i>   | N-acetyl glucosamine-1-phosphate<br>uridylyltransferase/glucosamine-1-phosphate acetyl<br>transferase (GlmU) | No Signal   | No Hits     |
| <i>glyS</i>   | Glycyl-tRNA synthetase (GRS)                                                                                 | No Signal   | No Hits     |
| <i>spsB</i>   | Signal peptidase Ib (SpsB)                                                                                   | No Signal   | No Hits     |
| <i>leuS</i>   | Leucyl-tRNA synthetase (LRS)                                                                                 | No Signal   | No Hits     |
| <i>PBP-2'</i> | Penicillin-binding protein-2' (PBP-2')                                                                       | No Signal   | No Hits     |
| <i>Pros</i>   | Prolyl-tRNA synthetase (PRS)                                                                                 | No Signal   | No Hits     |
| <i>RNAP</i>   | RNA polymerase (RNAP)                                                                                        | No Signal   | No Hits     |
| <i>rnpA</i>   | ribonuclease P protein component (Rnase-P)                                                                   | No Signal   | No Hits     |
| <i>serS</i>   | seryl-tRNA synthetase (SRS)                                                                                  | No Signal   | No Hits     |
| <i>thrS</i>   | threonyl-tRNA synthetase (TRS)                                                                               | No Signal   | No Hits     |

199 a) ELT targets where activity was confirmed by off-DNA synthesis and IC<sub>50</sub> measurement. b) Targets  
200 where antibacterial activity was confirmed and demonstrated through mechanism of action (MoA)  
201 studies. For HTS comparison see Payne *et al.* article<sup>7</sup>.

202

203

204 **Supplementary Table 4: MIC of teicoplanin (µg/ml) vs *A. baumannii* BM4652 strains**

| LpxA ELT hit compound <b>4</b>         | MIC of teicoplanin (µg/ml) vs <i>A. baumannii</i> BM4652 strains <sup>a</sup> |     |     |     |            |            |            |
|----------------------------------------|-------------------------------------------------------------------------------|-----|-----|-----|------------|------------|------------|
|                                        | 0                                                                             | 4   | 8   | 16  | 32         | 64         | 128        |
| <i>A. baumannii</i> BM4652             | >64                                                                           | >64 | >64 | 16  | <b>0.5</b> | <b>0.5</b> | <b>0.5</b> |
| <i>A. baumannii</i> BM4652/pRK415      | >64                                                                           | >64 | >64 | >64 | <b>0.5</b> | <b>0.5</b> | <b>0.5</b> |
| <i>A. baumannii</i> BM4652/pRK415-LpxA | >64                                                                           | >64 | >64 | >64 | >64        | >64        | >64        |

205 a) Determined in the presence of different concentrations of LpxA compound **4** ranging from 0 to 128  
206 µg/ml.

207

208

209

210

211

212 **Supplementary Table 5: LpxA ELT hit activity ( $\mu\text{g/ml}$ )**

| <i>A. baumannii</i>          | LpxA ELT hit activity ( $\mu\text{g/ml}$ )<br>Compound 4 |      |
|------------------------------|----------------------------------------------------------|------|
|                              | MIC                                                      | MGIC |
| BM4652 (efflux-)             | >128                                                     | 8    |
| BM4652/pRK415 (efflux-)      | >128                                                     | 8    |
| BM4652/pRK415-LpxA (efflux-) | >128                                                     | >128 |

213

214

215 **Supplementary Table 6: Compound 5 antibacterial mechanism of action.**

216

| Compound      | MIC ( $\mu\text{g/ml}$ ) vs <i>A. baumannii</i> BM4652 efflux mutant <sup>a</sup> |          |               | Fold MIC increase |
|---------------|-----------------------------------------------------------------------------------|----------|---------------|-------------------|
|               | N/A                                                                               | + pRK415 | + pRK415-UppS |                   |
| <b>5</b>      | 0.25                                                                              | 0.25     | 2             | 8                 |
| Ciprofloxacin | 1                                                                                 | 1        | 1             | 1                 |
| Ceftazidime   | 0.5                                                                               | 0.5      | 0.5           | 1                 |
| Azithromycin  | 0.031                                                                             | 0.031    | 0.031         | 1                 |

a) Determined in the presence of 30  $\mu\text{g/ml}$  polymyxin B nonapeptide.

217

218

219 **Supplementary Table 7: Compound 6 antibacterial mechanism of action.**

| Compound      | MIC ( $\mu\text{g/ml}$ ) <i>E. coli</i> TOP10 $\Delta\text{ToIC}$ |                           | Fold MIC decrease |
|---------------|-------------------------------------------------------------------|---------------------------|-------------------|
|               | + pHN678'                                                         | + pHN678'- Lola antisense |                   |
| <b>6</b>      | 128                                                               | 4                         | 32                |
| Imipenem      | 1                                                                 | 1                         | -                 |
| Ciprofloxacin | 0.0078                                                            | 0.0078                    | -                 |
| Azithromycin  | 0.0156                                                            | 0.0039                    | 4                 |

220

221



222 **Supplementary Notes:**

223

224 **Supplementary Note 1: Cellular Confirmation of Compound Mode of Action.**

225 *S. aureus* ELT compounds:

226 The antimicrobial mode-of-action (MoA) of compound **1** identified as a binder of MRS was investigated  
227 using an MRS overexpressor strain made from an open reading frame (ORF) expression library of the *S.*  
228 *aureus* genome<sup>1,2</sup>. The measured MICs of compound **1** were 0.5, 4 and 64 µg/ml in the *S. aureus* RN4220  
229 strains transformed with pYH4 vector alone, pYH4-MRS overexpressor (uninduced) and pYH4-MRS  
230 (induced with 0.1 µg/ml anhydrotetracycline), respectively. Hence, compound **1** demonstrated  
231 significant MIC increases of 8 (uninduced) and > 128-fold (induced) in the MRS overexpressors  
232 compared to the vector control. These data combined with the reported IC<sub>50</sub> of 0.00083 µM in **Table 2**,  
233 and described below, are consistent with on-target compound activity.

234 IRS compounds were tested for MoA using a *S. aureus* IRS overexpressor strain but no MIC increases  
235 were observed compared to isogenic parent strain hence IRS compound antibacterial MoAs were not  
236 confirmed. The MetAP ELT compound **3** lacked *S. aureus* antibacterial activity and could not be tested  
237 for MoA using a *S. aureus* MetAP overexpressor strain.

238

239 *A. baumannii* ELT compounds:

240 As *lpxA* has been shown to be not essential for *A. baumannii* viability in growth media, the LpxA ELT hits  
241 would not be expected to have MIC against this pathogen<sup>3</sup>. However, *lpxA* null mutants showed severely  
242 impaired growth that is clearly distinct from the wild type growth on MIC microtiter test plates. When  
243 testing for MIC against *A. baumannii* efflux mutant strain BM4652, we identified several LpxA ELT hits  
244 including **4** which exhibited this impaired growth. The antibacterial MoA of **4** was firmly established to  
245 be due to inhibition of LpxA by three methods: First, compound **4** showed a growth inhibition (we  
246 defined as MGIC for minimum growth inhibition concentration) starting at ~8 to 64 µg/ml although it  
247 exhibited no MIC (MIC is >128 µg/ml) against the same strain. Second, the inhibitory mode-of-action of  
248 LpxA ELT compound **4** was further verified by its ability to potentiate teicoplanin, a gram positive  
249 antibacterial agent that is inactive against gram negative bacteria because it cannot penetrate the outer  
250 membrane<sup>3</sup>. We reasoned that like LpxC inhibitors<sup>4</sup> LpxA ELT hits should be able to potentiate the  
251 activity of teicoplanin. The MIC of teicoplanin against *A. baumannii* BM4652 is very poor at > 64 µg/ml,  
252 however in the presence of 32 µg/ml of **4**, the teicoplanin MIC dramatically decreases to 0.5 µg/ml  
253 (**Supplementary Table 4**). This complete potentiation of teicoplanin is consistent with inhibition of  
254 LPS/lipid A production by the LpxA inhibitor resulting in altered outer membrane permeability. Third,  
255 when LpxA overexpressor clone was introduced into *A. baumannii* BM4652, the MGIC of **4** was  
256 increased from 8 to > 128 µg/ml (**Supplementary Table 5**) and the concentration of compound **4**  
257 required to completely potentiate teicoplanin increased from 32 to >128 µg/ml (**Supplementary Table**

258 4). These results strongly suggest that the observed impaired growth and potentiation of teicoplanin by  
259 compound **4** are mediated through LpxA.

260

#### 261 **Supplementary Note 2: Antibacterial mechanism of action of compound 5.**

262 The on-target MoA of UppS compound **5** was investigated using an *A. baumannii* UppS overexpressor  
263 strain. In these studies, polymyxin B nonapeptide (30 µg/ml) was added to permeabilise the cell and  
264 help with compound entry. The MIC of compound **5** without the permeabilising agent was > 128 µg/ml. In  
265 the presence of permeabilising agent, the MICs of **5** were 0.25 and 2 µg/ml against the *A. baumannii*  
266 pRK415 and pRK415-UppS expressor strains respectively. Hence, the compound MIC increased 8-fold in  
267 the UppS overexpressing strain relative to the parent strain. In contrast, MICs of control antibiotics  
268 ciprofloxacin, ceftazidime and azithromycin with different mechanism of actions were unchanged  
269 (**Supplementary Table 6**). These data, again combined with *in vitro* biochemical inhibition data, are  
270 consistent with an antibacterial MoA of **5** being through the target of interest, UppS.

271

#### 272 **Supplementary Note 3: Antibacterial mechanism of action of compound 6.**

273 Antimicrobial MoA of LolA compound **6** identified from *A. baumannii* campaign was investigated using a  
274 *lolA* antisense expressor in *E.coli*. This approach uses antisense induced from a plasmid construct, to  
275 titrate down the LolA target and possibly sensitize the cell to specific inhibition by LolA inhibitors.  
276 Compound **6** showed a 32-fold MIC decrease to *E. coli* efflux strain transformed with the *lolA* antisense  
277 plasmid compared to vector alone, and is consistent with an on target MoA. In contrast, there was little  
278 or no MIC effect on control antibiotics of different mechanisms of action with imipenem and  
279 ciprofloxacin while azithromycin produced a 4-fold decrease, illustrating the specificity of the antisense  
280 strain for determining LolA MoA. Results, shown in **Supplementary Table 7**, are consistent with a  
281 positive LolA MoA for compound **6** though further confirmation is required using a LolA biochemical  
282 assay such as that described<sup>5</sup>.

283

284

285

286

287

288

289

290

291 **Supplementary Methods:**

292 **Construct Cloning and Protein Expression:**

293 All genes were synthesized according to sequences available in the NCBI public database or from the  
294 genome of *A. baumannii* BM4454 that was completely sequenced in house, and cloned into either  
295 pCOLD vector for cytoplasmic proteins, or pBAD vector for membrane proteins. The pCOLD vectors  
296 contain a N-terminal Flag tag and a C-terminal SBP tag. The pBAD vectors contain a C terminal SBP-Flag  
297 tag. *E. coli* BL21(DE3) cells were transformed with recombinant plasmid (pCOLD or pBAD). For pCOLD  
298 expression, a single colony was inoculated into 5 mL of Luria-Bertani (LB) medium containing 100 µg/mL  
299 ampicillin. The cells were incubated at 37°C, and shaken at 180 rpm overnight. Cultures were diluted  
300 1:50 and expression was initiated with the addition of 0.1 mM IPTG at OD<sub>600</sub>=0.6-0.8. Expression was  
301 carried out at 16°C for approximately 20 hrs. Cells were harvested by centrifugation. For pBAD  
302 expression, a single colony was inoculated into 5 mL of LB medium containing 100 µg/mL ampicillin + 34  
303 µg/ml chloramphenicol. The cells were incubated at 37°C with shaking at 180 rpm overnight. Cultures  
304 were diluted 1:50 and expression was initiated with the addition of 0.2 % L-arabinose at OD<sub>600</sub>=0.6-0.8.  
305 Expression was carried out at 16°C for approximately 20 hrs. Cells were harvested by centrifugation.  
306 Expression was evaluated using Western blot with anti-Flag or anti-His antibodies. Cloning of *A.*  
307 *baumannii* targets and their protein overexpression and production were outsourced to GenScript.

308  
309

310 *Construction of MRS & UppS overexpressor in S.aureus*

311 *S. aureus* strains RN4220 (pYH4) and RN4220 (pYH4-UppS) and RN4220 (pYH4-MRS) were from an ORF  
312 expression library of the genome of *S. aureus* and ORF overexpression was induced by 0.1 µg/ml of  
313 anhydrotetracycline<sup>1,2</sup>.

314

315 *Construction of LpxA and UppS overexpressor in A. baumannii*

316

317 The ORFs of *lpxA* & *uppS* were PCR amplified from *A. baumannii* BM4454 genomic DNA and cloned into  
318 pCR™-Blunt II-TOPO® using the ZeroBlunt® TOPO® PCR Cloning Kit (Life Technologies). The following  
319 primers were used in the PCR amplification, which include unique restriction sites (in italic) and an *E. coli*  
320 consensus ribosome binding site (RBS, in bold): AbLpxAF, 5'-  
321 CGCTCTAGAGA**AAGG**AATAAGGCATGAGCAATCACGATTTAATC-3', AbLpxAR, 5'-  
322 CGCGAGCTCTTAGCGCACAATTCCACG-3'and AbuppSF, 5'-  
323 GCCAAGCTT**GAAGG**AATAAACCATGACCGATTCAGA-3', ABuppSR 5'-  
324 GCCGTCTAGATTATAATTTCTCGATTTTCTTGTCTG-3'. The resultant clones were sequenced to confirm the  
325 ORF identity and to be free of errors, digested with the unique restriction enzymes and subcloned into  
326 pRK415<sup>8</sup>. The pRK415-*lpxA* or pRK415-*uppS* plasmids were electroporated into *A. baumannii* BM4652  
327 (efflux deletion strain) followed by selection on Mueller-Hinton (MH) agar plates containing 4 µg/ml of

328 tetracycline. The transcription of pRK415-lpxA and pRK415-uppS is from the  $P_{lac}$  promoter on pRK415  
329 and translation uses the *E. coli* RBS.

330

331 *Construction of LolA antisense expressor in E. coli*

332 Primers **ACGGCGCGCCGGGAGTGACGTAATTTGAGGA** and **TTGTTTAAACGGCTTTTCAGATCGCTTGCG**  
333 (introducing unique restriction sites *PmeI* and *Ascl* in bold on the respective primers) were used to PCR  
334 amplify from *E. coli* TOP10 genomic DNA, a DNA fragment complementary to 25 bp of an upstream  
335 region encompassing the *lolA* ribosome binding site (rbs) and 89 bp of the N-terminal region of the *E.*  
336 *coli lolA* gene. The PCR product was digested with *PmeI* and *Ascl*, ligated into similarly cut pHN678', a  
337 vector with an IPTG-inducible promoter modified to include new *PmeI* and *Ascl* cloning sites, and  
338 transformed into *E. coli* TOP10 competent cells (Invitrogen) with selection on chloramphenicol (5  
339  $\mu\text{g/ml}$ )<sup>9</sup>. Plasmid isolated from a single colony was confirmed by DNA sequencing to contain *lolA* in an  
340 antisense orientation relative to the IPTG promoter. The construct was transformed into *E. coli* TOP10  
341 tolC (an efflux knockout mutant strain). In mode-of action studies, MIC plates were set up containing  
342 test compound in MH broth supplemented with 0.125 mM of IPTG to induce expression of *lolA*  
343 antisense and specifically sensitize the *E. coli* tolC *lolA* antisense expressor cells to LolA inhibitors. 7.5  
344  $\mu\text{g/ml}$  of polymyxinB nonapeptide was added to permeabilize cells to compound. Cells were incubated  
345 at 37°C and growth monitored over 48 h.

346

347

348 ***In vitro* Biochemical Assay Testing:**

349

350 *t*-RNA synthetase biochemical assay (IRS, MRS)

351

352 A modified protocol from Kumar, R. *et. al.* was used to measure *S. aureus* t-RNA synthetase activity<sup>10</sup>.  
353 Compounds were tested using an 11 point dose-response to measure an IC<sub>50</sub>. Briefly, 2-2.5 nM enzyme  
354 (IRS or MRS) was added to reaction plate containing inhibitor. All reagents were added using a Matrix  
355 multichannel 1250  $\mu\text{l}$  pipette. The reaction was initiated with the addition of substrate mix which  
356 contained: 25  $\mu\text{M}$  (0.005  $\mu\text{Ci}/\mu\text{L}$ ) <sup>14</sup>C-isoleucine, or 0.5  $\mu\text{M}$  (0.04  $\mu\text{Ci}/\mu\text{L}$ ) <sup>3</sup>H-methionine with 1 mg/ml *E.*  
357 *coli* tRNA in assay buffer with 50 mM Tris-HCl, pH 7.9, 10 mM MgCl<sub>2</sub>, 50 mM KCl, 2 mM DTT and 0.1  
358 mg/ml BSA. The reaction was incubated for 30 min at room temperature. After the incubation, the  
359 reaction was terminated by transferring 35  $\mu\text{L}$  into filter plate containing 100  $\mu\text{L}$  of 10% trichloro acetic  
360 acid (TCA). The plate was filtered and the filter washed 3 times with 100  $\mu\text{L}$  of 10% TCA. The filter plate  
361 (Multiscreen HV filter plate (0.45 $\mu\text{M}$ )(cat# MSHVN45B50) was dried in 60°C oven for 1h, and read in  
362 Topcount after adding 50  $\mu\text{L}$  of MicroScint cocktail. Compounds were tested at 1% DMSO in 11 point  
363 dose response and fit to a standard 4 parameter fit to calculate an IC<sub>50</sub> value and are reported as the  
364 average of two replicates. Standard deviation values were calculated using the n-1 method.

365

366 *UppS* biochemical assay

367  
368 Both the *S. aureus* and *A. baumannii* UppS *in vitro* biochemical assay use a pyrophosphatase and Biomol  
369 Green Phosphate detection reagent to assess catalytic activity. These assays were based on previously  
370 described assays both within GSK and others<sup>11-13</sup>. Briefly, the enzyme will add up to 8 isopentyl  
371 pyrophosphate (IPP) units onto a farnesyl pyrophosphate FPP molecule, resulting in the production of 8  
372 moles of inorganic pyrophosphates per mole of substrate added. The pyrophosphate is then converted  
373 to inorganic phosphate by a pyrophosphatase, and this phosphate is detected by Biomol Green. The  
374 assay is conducted in buffer containing 100 mM Trizma pH7.5, 1 mM MgCl<sub>2</sub>, 6 mM CHAPS and 0.005%  
375 bovine serum albumin (BSA). 5 nM UppS, 1 μM FPP, 10 μM IPP and 0.5 U/ml pyrophosphatase were  
376 incubated for 30 min at room temperature followed by an equal volume addition of Biomol Green  
377 reagent. All reagents were added using a Multidrop combi (Thermo Scientific) to a final assay volume of  
378 10 μL. The detection reagent was incubated for 20 min and 610-620 nm light was monitored by a Perkin  
379 Elmer Envision plate reader. Assay plates (384-well Corning plate # 3540) were pre-dispensed with 100  
380 nL DMSO or with 100 nL compounds dissolved in neat DMSO using an Echo® liquid handler (Labcyte  
381 Inc.). Compounds were tested at 1% DMSO in 11 point dose response with a 1:3 dilution and fit to a  
382 standard 4 parameter fit to calculate an IC<sub>50</sub> value and are reported as the average of two replicates.  
383 Standard deviation values were calculated using the n-1 method.

384

385

#### 386 *MetAP biochemical assay*

387

388 A fluorescence intensity coupled assay was used to measure the *in vitro* biochemical activity of *S. aureus*  
389 methionine aminopeptidase, MetAP. A 7-amino-trifluoromethylcoumarin (AFC) labeled peptide with  
390 the amino acid sequence MGFGF-AFC is converted to GFGF-AFC by MetAP. A cathepsin C coupling  
391 enzyme then digests the liberated peptide GFGF-AFC releasing the AFC causing a fluorescence increase  
392 monitored by an Envision plate reader. The assay was conducted in 50 mM HEPES (pH 7.5), 100 mM  
393 NaCl, 0.5 mM CHAPS, 200 μM NiCl<sub>2</sub>, 2.5 mM glutathione. 50 nM MetAP and 8 μM peptide are incubated  
394 at 25°C for 1 hr before quenching with a 1 mM 1,10-phenanthroline, 15 nM cathepsin C solution. After  
395 90 minute incubation with quench/detection solution, plates were read on an envision plate reader with  
396 an excitation wavelength of 405 nm, emission wavelength of 530 nm, and a dichroic filter of 505 nm. All  
397 reagents were added using a Multidrop combi (Thermo Scientific) to a final assay volume of 10 μL.  
398 Assay plates (384 Black Greiner Catalog # 784075) were pre-dispensed with 100 nL DMSO or with 100 nL  
399 compounds dissolved in neat DMSO using an Echo® liquid handler (Labcyte Inc.). Compounds were  
400 tested at 1% DMSO in 11 point dose response with a 1:3 dilution and fit to a standard 4 parameter fit to  
401 calculate an IC<sub>50</sub> value and are reported as the average of two replicates. Standard deviation values  
402 were calculated using the n-1 method.

403

#### 404 *Dihydrofolate reductase assay*

405

406 A fluorescence intensity coupled assay was used to measure the *in vitro* biochemical activity of *M.*  
407 *tuberculosis* Dihydrofolate reductase (DHFR). DHFR catalyzes the reduction of dihydrofolate (DHF) to  
408 tetrahydrofolate (THF) using NADPH as a cofactor. A diaphorase coupling enzyme then uses the

409 remaining NADPH to convert resazurin into the fluorescent resorufin<sup>14</sup>. The assay buffer containing  
410 81.4 mM Hepes pH 7.8, 300 mM KCl, 0.4 mg/mL BSA was used to make the enzyme addition containing  
411 1.2 µg/mL Mtb DHFR and 50 µM NADPH. This was added in equal volume (5 µL) to a substrate solution  
412 composed of 240 µM DHF in H<sub>2</sub>O and incubated for 50 min. Developing solution was prepared with  
413 0.045 mM Resazurin and 0.6 U/ml Diaphorase in 200 mM sodium phosphate buffer pH 7.8 and 5 µL was  
414 added. The experiments were conducted in black 384-well plates (Greiner Catalog # 784076) and all  
415 liquid additions were conducted using a Multidrop combi (Thermo Scientific). The plate was read on a  
416 ViewLux following a 10 minute delay. Resorufin light production was measured using appropriate  
417 Viewlux filters: Ex: 525 / 20 Pol (BODIPY TMR FP) Em: 598 / 25 (BODIPY TMR) (B04). Assay plates were  
418 pre-dispensed with 100 nL DMSO or with 100 nL compounds dissolved in neat DMSO using an Echo®  
419 liquid handler (Labcyte Inc.) where all wells contained compound samples, except wells in columns 6  
420 and 18 that contained DMSO control. Column 6 represented 100% Mtb DHFR activity in the absence of  
421 GSK compounds. Column 18 represented 100% inhibition in absence of Mtb DHFR. Compounds were  
422 tested at 1% DMSO in 11 point dose response with a 1:3 dilution and fit to a standard 4 parameter fit to  
423 calculate an IC<sub>50</sub> value and are reported as the average of two replicates. Standard deviation values  
424 were calculated using the n-1 method.

425  
426  
427

#### 428 **Minimum Inhibitory Concentration Assays:**

##### 429 *MIC determination against M. tuberculosis H37Rv:*

430 The measurement of the Minimum Inhibitory Concentration (MIC) against *M. tuberculosis* H37Rv for  
431 each tested compound was performed in 96-well flat-bottom, polystyrene microtiter plates in a final  
432 volume of 100 µl. Ten two-fold drug dilutions in neat DMSO starting at 50 mM were performed. Drug  
433 solutions were added to Middlebrook 7H9 medium (Difco) and Isoniazid (INH) (Sigma Aldrich) was used  
434 as a positive control with two-fold dilutions of INH starting at 160 µg/ml. The inoculum was standardized  
435 to approximately 1x10<sup>7</sup> cfu/ml and diluted 1 in 100 in Middlebrook 7H9 broth (Difco). This inoculum  
436 (100 µl) was added to the entire plate but G-12 and H-12 wells were used as blank controls. All plates  
437 were placed in a sealed box to prevent drying out of the peripheral wells and incubated at 37°C without  
438 shaking for six days. A Resazurin solution was prepared by dissolving one tablet of resazurin (Resazurin  
439 Tablets for Milk Testing; Ref 330884Y' VWR International Ltd) in 30 ml of sterile PBS (phosphate buffered  
440 saline). Of this solution, 25 µl were added to each well. Fluorescence was measured (Spectramax M5  
441 Molecular Devices, Excitation 530nm, Emission 590 nm) after 48 hours to determine the MIC<sub>90</sub> value.  
442 The values reported were observed in a minimum of 2 replicates.

##### 443 *MIC determination against all other bacteria:*

444 Minimum inhibitory concentrations (MICs) of compounds were determined using broth microdilution  
445 methods according to Clinical and Laboratory Standards Institute guidelines<sup>15,16</sup>. The MIC was the lowest  
446 concentration of an antibacterial that showed no visible growth after incubation at 37 °C for 18–24 h,

447 with a starting inoculum of  $\sim 5.5 \times 10^5$  colony forming units per mL. Bacterial strains used were from  
448 GSK's culture collection. All compound MICs are representative of at least two independent experiments  
449 and were within acceptable two-fold variation range.

450

451

452 **Compound Synthesis:**

453

454 **General Methods:** Commercially available starting reagents for the synthesis were purchased from  
455 Sigma-Aldrich and Fisher Scientific and used without further purification. Purification of final compounds  
456 for biological testing was performed on a Gilson GX-281 system with a Phenomenex Luna 5 $\mu$  C8(2)  
457 100X30 mm 100A column running gradient of 10-80% acetonitrile (ACN)/H<sub>2</sub>O (+0.1% trifluoroacetic acid  
458 [TFA]) over 20 minutes with flow rate of 35mL/min. The purity of final compounds was checked using an  
459 Agilent 1100 HPLC system coupled with a Thermo Finnigan LCQ Mass Spectrometer – Phenomenex Luna  
460 3 $\mu$  C8(2) 100A 50 x 3.00 mm column running gradient of 10-95% ACN/H<sub>2</sub>O (+0.1% formic acid) over 15  
461 minutes with flow rate 0.5mL/min. <sup>1</sup>H and <sup>13</sup>C NMR spectra were recorded on a Varian Mercury 400 plus  
462 (<sup>1</sup>H at 400.2 MHz and <sup>13</sup>C at 100.6MHz) or on a Bruker Avance instrument equipped with a TCI cryoprobe  
463 Plus (<sup>1</sup>H at 600.1 MHz and <sup>13</sup>C at 150.9MHz). Chemical shifts are expressed in parts per million (ppm,  $\delta$   
464 units). Coupling constants (*J*) are in units of Hertz (Hz). Splitting patterns describe apparent multiplicities  
465 and are designated as s (singlet), d (doublet), t (triplet), q (quartet), dd (double doublet), dt (double  
466 triplet), m (multiplet). High Resolution mass spectrometry was measured either on the Thermo LTQ  
467 Orbitrap Discovery (SN01442B) operating in electrospray ionization, positive (ESI+) at a resolving power  
468 30,000; or on the Thermo Exactive Plus (SN02078P) operating in electrospray ionization, negative (ESI-)  
469 at a resolving power 35,000. The system is calibrated using Thermo's positive ion calibration mix  
470 (caffeine, MRFA, and Ultramark polymer) on a weekly basis. Sample is introduced in 50:50 water: ACN  
471 having 0.05% TFA at 250  $\mu$ L/min by an Agilent 1200 LC to the MS Iontrap-Orbitrap, or by an Agilent 1100  
472 LC to the MS Orbitrap.

473

474

475

476

477

478

479

480

481 **Synthesis of 2-(4-bromo-3-hydroxyphenyl)-1-(2-(2-(2-(*tert*-butyl)phenoxy)acetamido)-1-(3,4-**  
 482 **dimethoxyphenyl)ethyl)-*N*-methyl-1*H*-benzo[*d*]imidazole-5-carboxamide (Compound 1)**

483

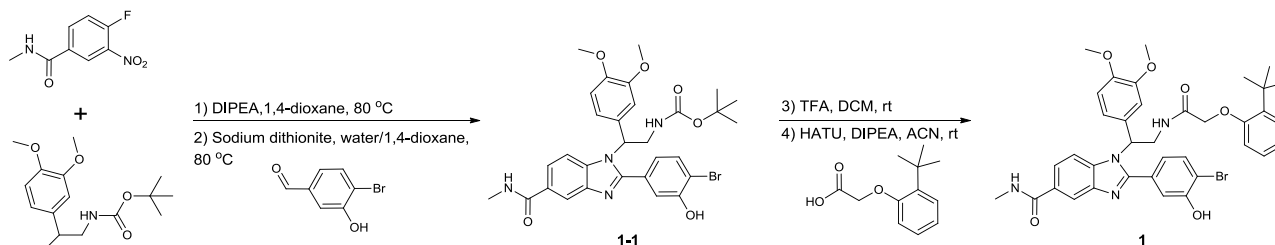

484  
485

486

487 To a solution of 4-fluoro-*N*-methyl-3-nitrobenzamide (141 mg, 0.712 mmol) and *tert*-butyl (2-  
 488 amino-2-(3,4-dimethoxyphenyl)ethyl)carbamate (211 mg, 0.712 mmol) in 1,4-dioxane (3 mL) was added  
 489 *N,N*-diisopropylethylamine (DIPEA) (0.173 mL, 0.997 mmol) at room temperature. The reaction was  
 490 heated at 80 °C for 8 hours. To the reaction was then added sodium dithionite (372 mg, 2.136 mmol), 4-  
 491 bromo-3-hydroxybenzaldehyde (143 mg, 0.712 mmol) and water (0.75 mL). The reaction was heated at  
 492 80 °C for 48 hours. The reaction was concentrated under vacuum and the residue was purified by a  
 493 reverse phase HPLC to give the desired product **1-1** (240 mg, 54% yield). <sup>1</sup>H NMR (400MHz, DMSO-*d*<sub>6</sub>):  
 494 δ 10.76 (br s, 1H), 8.45 (m, 1H), 8.17 (s, 1H), 7.68 (dd, 1H, *J*=8.6, 1.6Hz), 7.64 (m, 1H), 7.29 (m, 1H), 7.23  
 495 (m, 1H), 6.99-6.76 (m, 4H), 5.79 (br s, 1H), 4.01 (m, 1H), 3.80 (m, 1H), 3.71 (s, 3H), 3.66 (s, 3H), 2.78 (d,  
 496 3H, *J*=4.7Hz), 1.19 (s, 9H); <sup>13</sup>C NMR (101MHz, DMSO-*d*<sub>6</sub>): δ 167.1, 155.9, 154.9, 154.8 149.2, 149.1,  
 497 148.9, 135.7, 133.7, 128.9, 122.7, 121.4, 119.5, 117.9, 117.6, 113.4, 112.5, 112.3, 111.4, 110.8, 110.0,  
 498 78.5, 59.5, 56.0, 55.9, 28.6, 28.4, 26.8; MS (ESI+) (*m/z*): [M+H]<sup>+</sup> calcd. for C<sub>30</sub>H<sub>34</sub>BrN<sub>4</sub>O<sub>6</sub>, 625.16; found,  
 499 624.75.

500

501 To a solution of **1-1** (200 mg, 0.320 mmol) in dichloromethane (DCM) (2 mL) was added TFA  
 502 (0.246 mL, 3.20 mmol) at room temperature. The reaction was stirred at room temperature for 12 h  
 503 and then concentrated. The residue was re-dissolved in ACN (1 mL) and added to a solution of 2-(2-  
 504 (*tert*-butyl)phenoxy)acetic acid (33.3 mg, 0.160 mmol) and 1-[bis(dimethylamino)methylene]-1*H*-1,2,3-  
 505 triazolo[4,5-*b*]pyridinium 3-oxide hexafluorophosphate (HATU) (73.0 mg, 0.192 mmol) in ACN (2 mL) at  
 506 room temperature. The reaction was stirred at room temperature for 2 hours and concentrated. The  
 507 residue was purified by a reverse phase HPLC to give the desired product **1** (46 mg, 39% yield). <sup>1</sup>H NMR  
 508 (600MHz, DMSO-*d*<sub>6</sub>): δ 10.75 (br s, 1H), 8.45 (br d, 1H, *J*=4.2 Hz), 8.22 (d, 1H, *J*=1.1 Hz), 8.05 (t, 1H, *J*=5.9  
 509 Hz), 7.73 (br d, 1H, *J*=8.7 Hz), 7.65 (d, 1H, *J*=7.9 Hz), 7.45 (d, 1H, *J*=8.3Hz), 7.25 (s, 1H), 7.19 (dd, 1H,  
 510 *J*=7.7, 1.3 Hz), 7.07 (t, 1H, *J*=7.8 Hz), 6.99 (dd, 1H, *J*=8.1, 1.7 Hz), 6.92 (d, 1H, *J*=8.3 Hz), 6.88 (d, 1H, *J*=2.3  
 511 Hz), 6.84-6.87 (m, 1H), 6.82 (br d, 1H, *J*=8.3 Hz), 6.61 (d, 1H, *J*=8.3 Hz), 5.86 (dd, 1H, *J*=9.1, 5.7 Hz), 4.35-  
 512 4.40 (m, 1H), 4.31 (q, 2H, *J*=17.0 Hz), 4.03-4.05 (m, 1H), 3.73 (s, 3H), 3.68 (s, 3H), 2.81 (d, 3H, *J*=4.5 Hz),  
 513 1.24 (s, 9H); <sup>13</sup>C NMR (151MHz, DMSO-*d*<sub>6</sub>): δ 168.1, 166.5, 156.7, 154.5, 154.4, 148.8, 148.5, 141.2,  
 514 137.6, 135.1, 133.4, 129.4, 128.4, 127.1, 126.3, 122.3, 121.2, 120.9, 119.0, 117.9, 117.0, 113.1, 112.8,



515 112.0, 111.8, 110.4, 67.1, 58.4, 55.5, 55.5, 39.9, 34.3, 29.7, 26.3; HRMS ( $m/z$ ):  $[M+H]^+$  calcd. for  
516  $C_{37}H_{40}BrN_4O_6$ , 715.2126; found, 715.2115.  
517

518 **Synthesis of 3-(((3-(*tert*-butyl)-5-(4-(3,5-dichlorophenyl)piperazine-1-carbonyl)benzyl)amino)methyl)-  
519 *N*-methylbenzamide (Compound 2)**

520

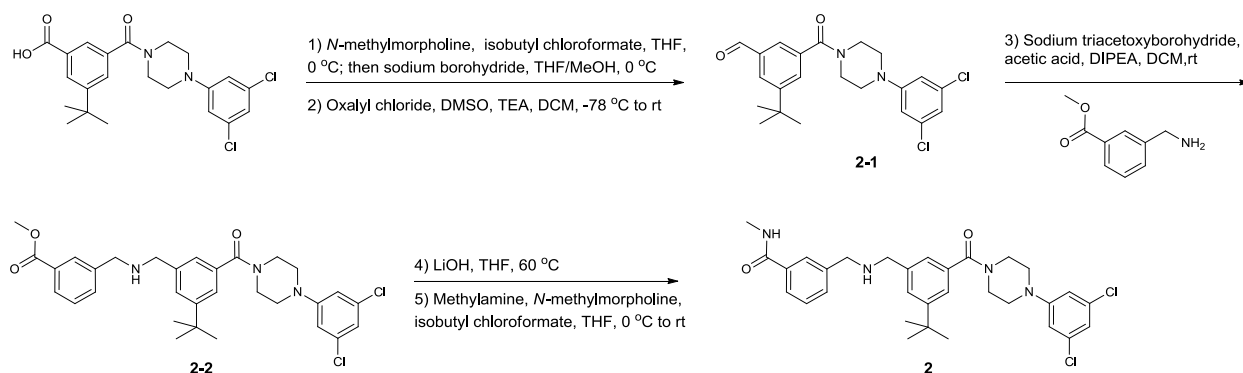

521

522 To a solution of 3-(*tert*-butyl)-5-(4-(3,5-dichlorophenyl)piperazine-1-carbonyl)benzoic acid (106  
523 mg, 0.243 mmol) and *N*-methylmorpholine (0.027 mL, 0.243 mmol) in tetrahydrofuran (THF) (2 mL) at 0  
524 °C was added dropwise a solution of isobutyl chloroformate (0.032 mL, 0.243 mmol) in THF (1 mL). The  
525 reaction mixture was then stirred at the same temperature for 15 minutes at which time the reaction  
526 mixture was added dropwise to a solution of sodium borohydride (9.19 mg, 0.243 mmol) in a 3:1  
527 mixture of THF (3 mL) and methanol (1 mL). After 30 minutes the reaction was quenched with 10%  
528 acetic acid/H<sub>2</sub>O. The reaction was then concentrated. The residue was taken up in ethyl acetate and  
529 washed with dilute NaHCO<sub>3</sub> (2×) and brine. It was dried over MgSO<sub>4</sub> and then concentrated. To a  
530 solution of oxalyl chloride (0.024 mL, 0.279 mmol) in DCM (1mL) at -78 °C was added dimethyl sulfoxide  
531 (DMSO) (0.040 mL, 0.559 mmol) dropwise. The reaction mixture was then stirred at the same temp for  
532 10 minutes at which time the residue from the previous step in DCM (1mL) was added. The reaction was  
533 continued to stir at the same temperature for 10 minutes at which time triethylamine (0.177 mL, 1.27  
534 mmol) was added dropwise to the reaction mixture. After stirring at -78 °C for 5 more minutes the cold  
535 bath was removed and the reaction mixture was allowed to warm to room temperature. The reaction  
536 mixture was concentrated and purified with a reverse phase HPLC to obtain the desired product **2-1**  
537 (70.5 mg, 69% yield). <sup>1</sup>H NMR (400MHz, CDCl<sub>3</sub>): δ 10.05 (s, 1H), 8.01 (t, 1H, *J* = 1.8Hz), 7.74 (d, 2H, *J* =  
538 2Hz), 6.88 (t, 1H, *J* = 1.8Hz), 6.77 (d, 2H, *J* = 1.6Hz), 3.97 (m, 2H), 3.62 (m, 2H), 3.33 (m, 2H), 3.20 (m, 2H),  
539 1.38 (s, 9H); <sup>13</sup>C NMR (101MHz, CDCl<sub>3</sub>): δ 191.7, 170.3, 153.6, 152.0, 136.4, 135.7, 135.0, 130.4, 128.6,  
540 125.3, 120.2, 114.6, 52.2, 50.1, 35.1, 31.1; MS (ESI+) ( $m/z$ ):  $[M+H]^+$  calcd. for C<sub>22</sub>H<sub>25</sub>Cl<sub>2</sub>N<sub>2</sub>O<sub>2</sub>, 419.12;  
541 found, 419.15.

542

543 To a solution of **2-1** (84.9 mg, 0.202 mmol) in DCM (4mL) was added methyl 3-  
544 (aminomethyl)benzoate (61.2 mg, 0.304 mmol) and DIPEA (0.035 mL, 0.202 mmol) at room  
545 temperature. The reaction was stirred at room temperature for 5 minutes at which time acetic acid (0.4

546 mL) was added. The reaction was continued to stir at room temperature for an additional 15 minutes,  
547 and then sodium triacetoxyborohydride (86 mg, 0.405 mmol) was added and the reaction was allowed  
548 to stir at room temperature overnight. The reaction was quenched with a small amount of methanol and  
549 washed with water. The aqueous layer was separated and back extracted with DCM (1x). The combined  
550 organic layers were then washed with brine, dried over MgSO<sub>4</sub>, and concentrated to obtain the desired  
551 product **2-2** (90 mg, 78% yield) which was used without any further purification. <sup>1</sup>H NMR (400MHz,  
552 CDCl<sub>3</sub>): δ 8.04 (s, 1H), 8.02 (d, 1H, *J* = 1.6Hz), 7.56 (d, 1H, *J* = 8Hz), 7.47 (m, 1H), 7.44 (m, 1H), 7.40 (t, 1H,  
553 *J* = 1.6Hz), 7.30 (s, 1H), 6.87 (t, 1H, *J* = 1.8Hz), 6.75 (d, 2H, *J* = 2Hz), 4.10 (m, 4H), 3.91 (m, 2H), 3.88 (s,  
554 3H), 3.53 (m, 2H), 3.26 (m, 2H), 3.16 (m, 2H), 1.25 (s, 9H); <sup>13</sup>C NMR (101MHz, CDCl<sub>3</sub>): δ 170.6, 166.2,  
555 153.5, 152.0, 135.6, 135.2, 134.2, 131.1, 130.9, 130.8, 130.7, 130.5, 129.4, 129.1, 125.2, 125.1, 120.0,  
556 114.5, 52.3, 50.3, 50.1, 48.8, 42.1, 34.9, 30.9; MS (ESI+) (*m/z*): [M+H]<sup>+</sup> calcd. for C<sub>31</sub>H<sub>36</sub>Cl<sub>2</sub>N<sub>3</sub>O<sub>3</sub>, 568.21;  
557 found, 568.20.

558  
559 The residue was re-dissolved in THF (1 mL) and to it was added 1M LiOH aqueous solution (1 mL)  
560 and stirred at 60 °C for 2 hours. The reaction was acidified with 1N HCl and then diluted with ethyl  
561 acetate and washed with water (2x). The combined aqueous layers were back-extracted with ethyl  
562 acetate. The combined organic layers were then washed with brine and concentrated. The residue (39.7  
563 mg, 0.072 mmol) was dissolved in THF (1.5 mL) and added *N*-methylmorpholine (9.84 μL, 0.089 mmol) at  
564 0 °C, and it was then added a solution of isobutyl chloroformate (0.012 mL, 0.089 mmol) in THF (1 mL)  
565 dropwise. The reaction mixture was allowed to stir at the same temperature for 20 minutes at which  
566 time a solution of methylamine (6.7 mg, 0.215 mmol) in THF (0.5 mL) was added. The reaction was  
567 continued to stir at 0 °C for 5 minutes and then allowed to warm to room temperature. The reaction was  
568 continued to stir at room temperature for 3 days. The reaction was concentrated and set-up again with  
569 isobutyl chloroformate (0.006 mL, 0.045 mmol) and methylamine (6.7 mg) and continued for another 30  
570 minutes. The reaction mixture was concentrated and the residue was purified by a reverse phase HPLC  
571 to obtain the desired product **2** (4.1 mg, 10% yield) <sup>1</sup>H NMR (600MHz, DMSO-d<sub>6</sub>): δ 9.31 (br s, 2H), 8.40-  
572 8.58 (m, 1H), 8.01 (s, 1H), 7.86 (d, 1H, *J*=7.6 Hz), 7.63 (d, 1H, *J*=7.0 Hz), 7.62 (s, 1H), 7.53 (t, 1H, *J*=7.9 Hz),  
573 7.48 (s, 1H), 7.38 (s, 1H), 6.97 (s, 2H), 6.91 (s, 1H), 4.23-4.29 (m, 4H), 3.74 (br d, 2H, *J*=0.8 Hz), 3.40-3.47  
574 (m, 2H), 3.22-3.32 (m, 4H), 2.79 (d, 3H, *J*=4.5 Hz), 1.32 (s, 9H) ; <sup>13</sup>C NMR (151MHz, DMSO-d<sub>6</sub>): δ 168.8,  
575 166.1, 152.3, 151.5, 135.7, 134.9, 134.7, 132.6, 132.1, 132.0, 129.4, 128.6, 128.1, 127.2, 125.8, 124.5,  
576 117.4, 113.4, 50.2, 50.2, 47.4, 41.2, 34.7, 30.9, 26.3; HRMS (*m/z*): [M+H]<sup>+</sup> calcd. for C<sub>31</sub>H<sub>37</sub>Cl<sub>2</sub>O<sub>2</sub>N<sub>4</sub>,  
577 567.2281; found, 567.2275.

578  
579  
580  
581  
582  
583  
584  
585  
586

587 **Synthesis of 2-(1-(benzo[d][1,3]dioxol-5-yl)propan-2-yl)-7-chloro-1-((5-methyl-4H-1,2,4-triazol-3-yl)methyl)-1H-benzo[d]imidazole (Compound 3)**

588

589

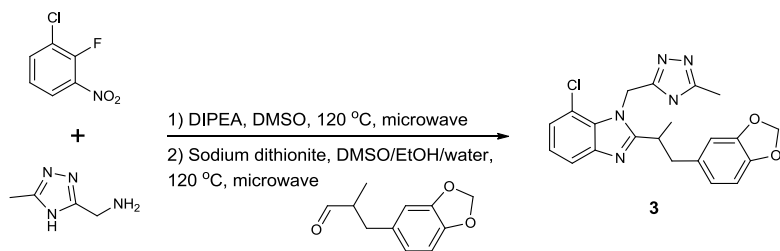

590

591

592 To a microwave reaction vial (5 mL) was added 1-chloro-2-fluoro-3-nitrobenzene (39.9 mg,  
593 0.227 mmol), (5-methyl-4H-1,2,4-triazol-3-yl)methanamine HCl (46.3 mg, 0.250 mmol), DMSO (1 mL),  
594 and DIPEA (0.040 mL, 0.227 mmol). The reaction vial was sealed and heated in a microwave reactor at  
595 120 °C for 15 minutes. To the reaction vial was added 3-(benzo[d][1,3]dioxol-5-yl)-2-methylpropanal  
596 (48.1 mg, 0.250 mmol) and sodium dithionite (79 mg, 0.455 mmol), followed by the addition of ethanol  
597 (0.5 mL) and water (0.5 mL). The reaction vial was sealed and heated in a microwave reactor at 120 °C  
598 for 20 minutes. The reaction mixture was purified with a reverse phase HPLC to give the desired product  
599 **3** (15 mg, 14% yield). <sup>1</sup>H NMR (600MHz, DMSO-d<sub>6</sub>): δ 13.49 (br s, 1H), 7.59 (d, 1H, J=7.7 Hz), 7.21 (d, 1H,  
600 J=7.7 Hz), 7.18 (t, 1H, J=7.6 Hz), 6.75 (br d, 1H, J=7.9 Hz), 6.74 (s, 1H), 6.59 (d, 1H, J=7.9 Hz), 5.94 (d, 2H,  
601 J=4.9 Hz), 5.70 (q, 2H, J=17.4 Hz), 3.47-3.54 (m, 1H), 2.99 (dd, 1H, J=13.6, 6.4 Hz), 2.76 (dd, 1H, J=13.4,  
602 8.1 Hz), 2.26 (s, 3H), 1.20 (d, 3H, J=6.8 Hz); <sup>13</sup>C NMR (151MHz, DMSO-d<sub>6</sub>): δ 160.6, 156.0, 153.5, 147.0,  
603 145.4, 143.8, 133.2, 130.2, 123.6, 122.6, 121.9, 117.6, 115.2, 109.2, 107.9, 100.6, 41.6, 41.0, 32.7, 19.0,  
604 11.6; HRMS (m/z): [M+H]<sup>+</sup> calcd. for C<sub>21</sub>H<sub>21</sub>ClN<sub>5</sub>O<sub>2</sub>, 410.1378; found, 410.1373.

605

606

607 **Synthesis of 2-(3-mesitylureido)-5-(4-methylpiperazin-1-yl)-5-oxo-N-(5,6,7,8-tetrahydronaphthalen-1-yl)pentanamide (Compound 4)**

608

609

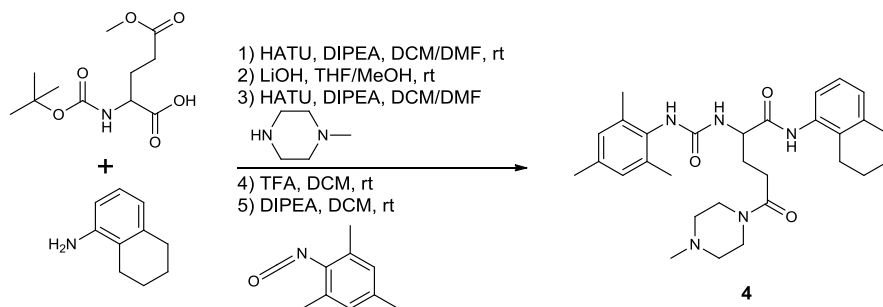

610

611

612 To a solution of 2-((tert-butoxycarbonyl)amino)-5-methoxy-5-oxopentanoic acid (78 mg, 0.300  
613 mmol) in DCM (2 mL) was added a solution of HATU (137 mg, 0.360 mmol) in N,N-dimethylformamide  
614 (DMF) (1 mL), and this reaction was stirred at room temperature for 5 minutes at which point a solution  
615 of 5,6,7,8-tetrahydronaphthalen-1-amine (44.2 mg, 0.300 mmol) in DCM was added along with DIPEA

616 (0.157 ml, 0.9 mmol). The reaction was stirred an additional 5 hours at room temperature until  
617 complete acylation was observed by LCMS. Upon completion, the reaction was concentrated and then  
618 diluted with ethyl acetate and washed with NaHCO<sub>3</sub> aqueous solution (3×) followed by brine. The  
619 organic layer was collected and the solvent removed in vacuum. This crude material was then dissolved  
620 in THF (2 mL) and was added 2M LiOH aqueous solution (0.450 mL, 0.900 mmol) and methanol. The  
621 reaction was stirred at room temperature for 15 hours, at which point complete hydrolysis was  
622 observed by LCMS. Upon completion, the solvent was removed and ethyl acetate was added. The  
623 reaction was acidified with 1N HCl and then the organic layer was collected, washed with brine then  
624 dried over MgSO<sub>4</sub>, and ethyl acetate was then removed. The residue was then dissolved in DCM (2 mL)  
625 and a solution of HATU (137 mg, 0.360 mmol) in DMF (1 mL) was added. After stirring at room  
626 temperature for 10 minutes, 1-methylpiperazine (30.0 mg, 0.300 mmol) along with DIEPA (0.157 mL,  
627 0.900 mmol) was added. The reaction was stirred at room temperature for 2 hours at which point  
628 complete acylation was observed by LCMS. Upon completion the reaction was concentrated and then  
629 diluted with ethyl acetate and washed with NaHCO<sub>3</sub> aqueous solution (3×) followed by brine. The  
630 organic layer was collected and the solvent was removed. The residue was added to a solution of 20%  
631 TFA/DCM and stirred at room temperature for 3 hours, at which point complete deprotection of the Boc  
632 group was observed by LCMS. Upon completion the reaction was dried. The crude reaction material was  
633 dissolved in DCM (2 mL) and was added 2-isocyanato-1,3,5-trimethylbenzene and DIPEA (0.157 mL,  
634 0.900 mmol). After stirring at room temperature for 3 hours complete urea formation was observed by  
635 LCMS. Upon completion the reaction was dried and the crude material was purified by a reverse phase  
636 HPLC to give the desired product **4** (26 mg, 13% yield). <sup>1</sup>H NMR (600MHz, DMSO-d<sub>6</sub>): δ 9.28 (s, 1H), 7.66  
637 (br s, 1H), 7.25 (d, 1H, *J*=7.6 Hz), 6.98-7.15 (m, 1H), 6.91 (d, 1H, *J*=7.6 Hz), 6.85 (s, 2H), 6.59 (br s, 1H),  
638 4.35-4.53 (m, 2H), 3.88-4.07 (m, 1H), 3.36-3.43 (m, 3H), 2.82-3.12 (m, 3H), 2.78 (br s, 3H), 2.73 (br t, 2H,  
639 *J*=5.5 Hz), 2.52-2.64 (m, 2H), 2.43-2.49 (m, 2H), 2.21 (s, 3H), 2.12 (s, 6H), 2.00-2.07 (m, 1H), 1.86 (dq, 1H,  
640 *J*=14.3, 7.3 Hz), 1.70-1.73 (m, 2H), 1.69 (br s, 2H); <sup>13</sup>C NMR (151MHz, DMSO-d<sub>6</sub>): δ 171.0, 170.4, 155.9,  
641 137.4, 135.6, 135.3, 134.7, 133.1, 130.5, 128.3, 126.1, 125.1, 122.2, 53.1, 52.2, 42.3, 42.0, 38.3, 29.2,  
642 28.7, 24.2, 22.4, 22.3, 20.4, 18.1; HRMS (*m/z*): [*M*+*H*]<sup>+</sup> calcd. for C<sub>30</sub>H<sub>42</sub>N<sub>5</sub>O<sub>3</sub>, 520.3282; found, 520.3280.

643  
644  
645

#### 646 **Synthesis of (*R*)-*N*1-(4-(*tert*-butyl)benzyl)-4,5-dichloro-*N*2-(3,3-dimethyl-1-(methylamino)-1-oxobutan- 647 2-yl)phthalamide (Compound 5)**

648

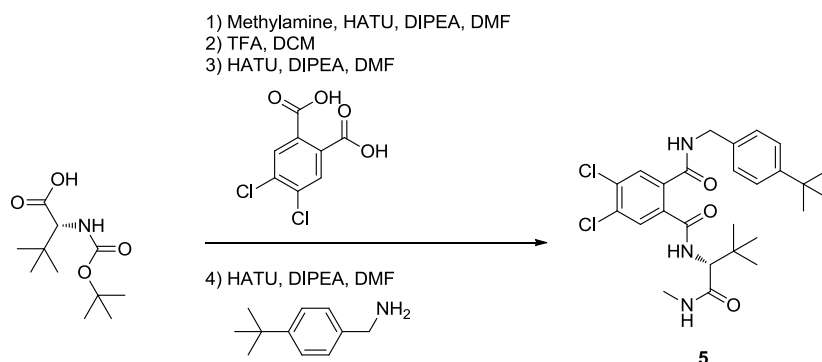

649

650

651 To a solution of (*R*)-2-((*tert*-butoxycarbonyl)amino)-3,3-dimethylbutanoic acid (100 mg, 0.432  
652 mmol) and HATU (164 mg, 0.432 mmol) in DMF (2 mL) was added DIPEA (0.3 mL, 1.73 mmol) and the  
653 reaction was stirred at room temperature for 2 minutes before the addition of methylamine  
654 hydrochloride salt and the mixture was stirred at room temperature for 30 minutes. Ethyl acetate was  
655 added and washed with NaHCO<sub>3</sub> aqueous solution (3×) and brine. The organic layer was dried over  
656 Na<sub>2</sub>SO<sub>4</sub> and concentrated. The residue was re-dissolved in a solution of 30% TFA/DCM (3 mL) and stirred  
657 at room temperature for 20 minutes. The solvent was removed under reduced pressure. The residue  
658 and HATU (164 mg, 0.432 mmol) was then added to a solution of 4,5-dichlorophthalic acid (102 mg,  
659 0.432 mmol), (4-(*tert*-butyl)phenyl)methanamine (71 mg, 0.432 mmol), HATU (164 mg, 0.432 mmol) and  
660 DIPEA (0.3 mL, 1.73 mmol) in DMF (2mL) which had been stirred at room temperature for 30 minutes.  
661 The mixture was stirred at room temperature for 30 minutes and then purified with a reverse phase  
662 HPLC to give the desired product **5** (80 mg, 27% yield). <sup>1</sup>H NMR (600MHz, DMSO-d<sub>6</sub>): δ 8.98 (t, 1H, *J*=5.9  
663 Hz), 8.33 (br d, 1H, *J*=8.7 Hz), 7.94 (br d, 1H, *J*=4.5 Hz), 7.77 (s, 1H), 7.69 (s, 1H), 7.33-7.36 (m, 2H, *J*=7.9  
664 Hz), 7.26-7.28 (m, 2H, *J*=7.9 Hz), 4.37 (br d, 2H, *J*=5.7 Hz), 4.25 (d, 1H, *J*=9.1 Hz), 2.58 (d, 3H, *J*=4.5 Hz),  
665 1.27 (s, 9H), 0.96 (s, 9H); <sup>13</sup>C NMR (151MHz, DMSO-d<sub>6</sub>): δ 170.1, 165.8, 165.7, 149.2, 136.2, 135.7,  
666 135.6, 132.0, 131.8, 130.3, 129.5, 127.1, 125.0, 61.0, 42.5, 34.1, 34.1, 31.2, 26.8, 25.3; HRMS (*m/z*):  
667 [M+H]<sup>+</sup> calcd. for C<sub>26</sub>H<sub>34</sub>Cl<sub>2</sub>N<sub>3</sub>O<sub>3</sub>, 506.1972; found, 506.1971.

668

669 **Synthesis of *N*-(2-(2-(3-cyano-5-fluorophenyl)-6-(ethylamino)pyrimidin-4-yl)-1-methyl-1,2,3,4-**  
670 **tetrahydroisoquinolin-6-yl)methanesulfonamide (Compound 6)**

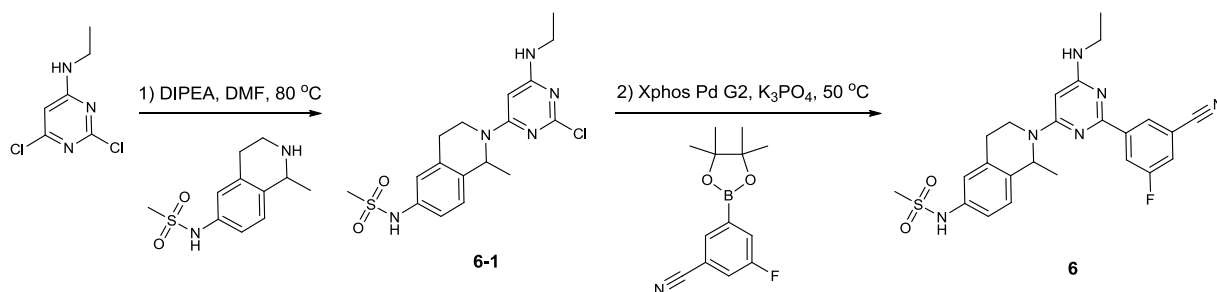

671

672 To a solution of 2,6-dichloro-*N*-ethylpyrimidin-4-amine (50 mg, 0.26 mmol) and *N*-(1-methyl-  
673 1,2,3,4-tetrahydroisoquinolin-6-yl)methanesulfonamide hydrochloride (72 mg, 0.26 mmol) in DMF (2  
674 mL) was added DIPEA (0.135 mg, 1.04 mmol) and stirred at 80 °C for 1 day. The mixture was purified  
675 with a reverse phase HPLC to give the desired product **6-1** (48 mg, 47% yield). <sup>1</sup>H NMR (400MHz, DMSO-  
676 d<sub>6</sub>): δ 9.63 (s, 1H), 7.17 (d, 1H, *J* = 8.2Hz), 7.03 (dd, 1H, *J* = 8.4, 2.2Hz), 6.98 (d, 1H, *J*=2Hz), 6.15 (s, 1H),  
677 3.35-3.18 (m, 5H), 2.94 (s, 3H), 2.79 (t, 2H, *J* = 5.7Hz) 1.37 (d, 3H, *J* = 6.7Hz), 1.08 (t, 3H, *J* = 7Hz); <sup>13</sup>C NMR  
678 (101MHz, DMSO-d<sub>6</sub>): δ 162.3, 161.1, 159.0, 158.6, 136.9, 135.6, 128.2, 120.1, 118.7, 90.9, 50.1, 35.9,  
679 28.5, 21.4, 15.1. MS (ESI+) (*m/z*): [M+H]<sup>+</sup> calcd. for C<sub>17</sub>H<sub>23</sub>ClN<sub>5</sub>O<sub>2</sub>S, 396.12; found, 396.20.

680

681 To a solution of **6-1** (48 mg, 0.121 mmol) and 3-fluoro-5-(4,4,5,5-tetramethyl-1,3,2-  
682 dioxaborolan-2-yl)benzonitrile (64 mg, 0.26 mmol) in THF (2mL) and 0.5M K<sub>3</sub>PO<sub>4</sub> aqueous buffer (1 mL)  
683 was added Xphos Pd G2 (12 mg, 0.016 mmol), and the mixture was stirred at 50 °C overnight. The

684 mixture was purified with a reverse phase HPLC to give the desired product **6** (4 mg, 6% yield). <sup>1</sup>H NMR  
 685 (600MHz, DMSO-d<sub>6</sub>): δ 9.58 (s, 1H), 8.40 (s, 1H), 8.23 (br d, 1H, *J*=10.2 Hz), 7.86 (dd, 1H, *J*=8.1, 0.9 Hz),  
 686 7.15 (br d, 1H, *J*=8.3 Hz), 7.01 (br d, 1H, *J*=7.9 Hz), 6.95 (s, 1H), 6.77 (br s, 1H), 6.58-6.72 (m, 1H), 3.97 (s,  
 687 1H), 3.30 (br d, 2H, *J*=6.8 Hz), 2.90 (s, 3H), 2.78 (br s, 2H), 1.37 (d, 3H, *J*=6.8 Hz), 1.09 (t, 3H, *J*=7.2 Hz); <sup>13</sup>C  
 688 NMR (151MHz, DMSO-d<sub>6</sub>): 162.3, 161.9, 162.0, 159.0, 142.5, 136.4, 135.3, 134.5, 127.7, 126.7, 119.9,  
 689 119.7, 118.4, 118.2, 117.8, 112.9, 39.2, 35.4, 28.3, 21.0, 15.0; HRMS (*m/z*): [M+H]<sup>+</sup> calcd. for  
 690 C<sub>24</sub>H<sub>26</sub>FN<sub>6</sub>O<sub>2</sub>S, 481.1816; found, 481.1827.  
 691

692

693 **Synthesis of *N*-(3-amino-3-oxopropyl)-3-hydroxy-5-(2-(2-methyl-3-oxo-2*H*-benzo[*b*][1,4]oxazin-4(3*H*)-  
 694 yl)acetamido)-*N*-(2-(4-methylphenylsulfonamido)ethyl)benzamide (Compound **7**)**

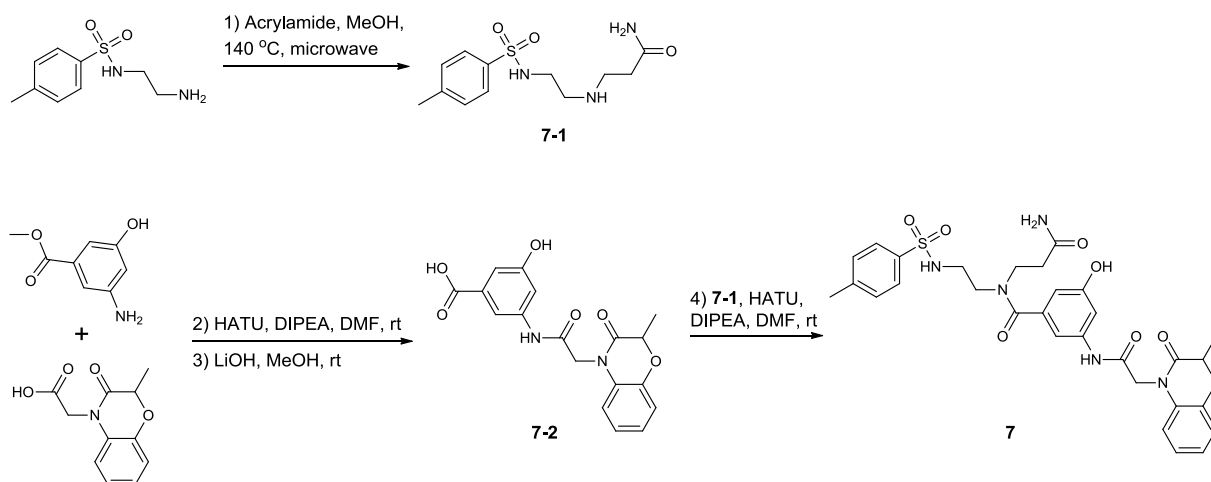

695

696 To a microwave vial was added a solution of *N*-(2-aminoethyl)-4-methylbenzenesulfonamide (2  
 697 g, 9.34 mmol) and acrylamide (331 mg, 4.67 mmol) in methanol (24 ml), and the vial was sealed and  
 698 heated in a microwave reaction at 140 °C for 30 minutes. The reaction mixture was concentrated under  
 699 reduced pressure and purified by a reverse phase HPLC to give the desired product **7-1** (952 mg, 90%  
 700 yield). <sup>1</sup>H NMR (400MHz, DMSO-d<sub>6</sub>): δ 8.53 (br s, 2H), 7.84 (m, 1H), 7.69 (d, 2H, *J* = 8.2Hz), 7.41(d, 2H, *J* =  
 701 8.2Hz), 7.10 (br s, 1H), 3.08 (m, 2H), 2.97 (m, 4H), 2.44 (t, 2H, *J* = 8.0 Hz), 2.37 (s, 3H); <sup>13</sup>C NMR (101MHz,  
 702 DMSO-d<sub>6</sub>): δ 171.9, 143.6, 137.0, 130.2, 127.01, 46.8, 43.6, 39.2, 30.8, 21.4; MS (ESI+) (*m/z*): [M+H]<sup>+</sup>  
 703 calcd. for C<sub>12</sub>H<sub>20</sub>N<sub>3</sub>O<sub>3</sub>S, 286.11; found, 286.05.

704 To a solution of 2-(2-methyl-3-oxo-2*H*-benzo[*b*][1,4]oxazin-4(3*H*)-yl)acetic acid (50 mg, 0.226  
 705 mmol), methyl 3-amino-5-hydroxybenzoate (37.8 mg, 0.226 mmol) and HATU(86 mg, 0.226 mmol) in  
 706 DMF (2 mL) was added DIPEA (0.16 mL, 0.9 mmol). The reaction was stirred at room temperature for 2  
 707 hours, and the solvent was then removed. The residue was suspended in methanol (3 mL) and LiOH 1M  
 708 aqueous solution (1.1 mL, 1.1 mmol) was added. The solution was stirred at 50 °C for 2 hours and  
 709 purified with a reverse phase HPLC to give the desired product **7-2** (65 mg, 72% yield). <sup>1</sup>H NMR (400MHz,  
 710 DMSO-d<sub>6</sub>): δ 10.4 (s, 1H), 9.81 (br s, 1H), 7.61 (t, 1H, *J*=1.6Hz), 7.31 (t, 1H, *J*=2.2Hz), 7.01 (m, 5H), 4.76

711 (m, 3H), 1.44 (d, 3H,  $J = 6.7\text{Hz}$ );  $^{13}\text{C}$  NMR (101MHz, DMSO- $d_6$ ):  $\delta$  167.5, 167.2, 166.0, 158.1, 144.2,  
712 140.2, 132.6, 129.8, 124.1, 123.2, 117.2, 115.6, 111.6, 111.5, 110.7, 73.1, 44.9, 16.6; MS (ESI+) ( $m/z$ ):  
713  $[\text{M}+\text{H}]^+$  calcd. for  $\text{C}_{18}\text{H}_{17}\text{N}_2\text{O}_6$ , 357.10; found, 356.69.

714 To a solution of **7-2** (22.6 mg, 0.063 mmol), **7-1** (18.1 mg, 0.063 mmol) and HATU (48.1 mg,  
715 0.127 mmol) in DMF (1 ml) was added DIPEA (0.036 ml, 0.209 mmol). The reaction was stirred at room  
716 temperature for 16 hours and purified by a reverse phase HPLC to give the desired product **7** (6.7 mg,  
717 17% yield).  $^1\text{H}$  NMR (600MHz, DMSO- $d_6$ ):  $\delta$  10.32 (br s, 1H), 9.74 (br s, 1H), 7.54 (br d, 3H,  $J=6.4$  Hz),  
718 7.25-7.45 (m, 3H), 7.13 (br s, 1H), 7.01-7.06 (m, 1H), 7.00 (br s, 1H), 7.00-7.05 (m, 1H), 6.99-7.06 (m, 1H),  
719 6.89-6.99 (m, 1H), 6.82 (br d, 1H,  $J=11.7$  Hz), 6.32-6.47 (m, 1H), 4.76-4.81 (m, 1H), 4.70 (br s, 2H), 3.49  
720 (br s, 1H), 3.37-3.42 (m, 1H), 3.36-3.42 (m, 1H), 3.15-3.26 (m, 1H), 2.94 (br s, 1H), 2.78 (br s, 1H), 2.37 (br  
721 d, 3H,  $J=10.2$  Hz), 2.31-2.37 (m, 1H), 2.22 (br s, 1H), 1.46 (d, 3H,  $J=6.4$  Hz);  $^{13}\text{C}$  NMR (151MHz, DMSO- $d_6$ ):  
722  $\delta$  172.1, 170.5, 166.7, 165.4, 157.6, 143.8, 142.6, 139.6, 138.1, 137.5, 129.6, 129.4, 126.4, 123.6, 122.7,  
723 116.7, 115.2, 108.5, 107.7, 106.7, 72.7, 45.8, 44.5, 44.4, 40.5, 33.7, 20.9, 16.1; HRMS ( $m/z$ ):  $[\text{M}+\text{H}]^+$   
724 calcd. for  $\text{C}_{30}\text{H}_{34}\text{N}_5\text{O}_8\text{S}$ , 624.2123; found, 624.2117.

725

#### 726 Source of 6-(2,5-dimethoxybenzyl)-5-methylpyrido[2,3-d]pyrimidine-2,4-diamine (Compound 8)

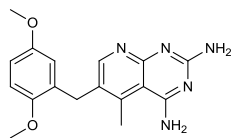

727

728 This compound was provided by an outsourcing company and was available through GSK  
729 corporate collection. Compound **8** is now available through commercial sources under CAS#72732-56-0  
730 from Ark Pharma, Atomax Chemicals, BOC Sciences, and a few additional small vendors. Its structure  
731 was confirmed with the analytical data.  $^1\text{H}$  NMR (600MHz, DMSO- $d_6$ ):  $\delta$  8.34 (s, 1H), 6.92 (d, 3H,  $J=9.1$   
732 Hz), 6.76 (dd, 1H,  $J=8.7, 3.0$  Hz), 6.42 (d, 1H,  $J=3.0$  Hz), 6.19 (br s, 2H), 3.89 (s, 2H), 3.75 (s, 3H), 3.61 (s,  
733 3H), 2.54 (s, 3H);  $^{13}\text{C}$  (151MHz, DMSO- $d_6$ ):  $\delta$  164.0, 161.5, 161.3, 156.0, 153.1, 151.0, 144.0, 129.2,  
734 126.5, 115.9, 111.5, 111.0, 105.4, 55.8, 55.2, 30.2, 17.8; HRMS ( $m/z$ ):  $[\text{M}+\text{H}]^+$  calcd. for  $\text{C}_{17}\text{H}_{20}\text{O}_2\text{N}_5$ ,  
735 326.1612; found, 326.1605.

736

#### 737 Synthesis of 3-(2-((6-methylpyridin-2-yl)amino)-2-oxoethyl)-1H-indole-2-carboxylic acid (Compound 9)

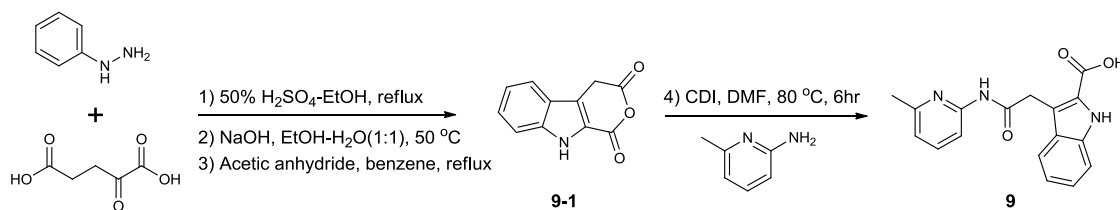

738

739

740 Intermediate **9-1** (200 mg, 1.0 mmol), which was prepared as previously reported<sup>17</sup>, in  
741 anhydrous DMF (5 mL) was added 1,1'-carbonyldiimidazole (CDI) (182 mg, 1.15 mmol) and stirred at 80  
742 °C for 1 hour. Then 6-methylpyridin-2-amine (151 mg, 1.4 mmol) was added and the mixture was stirred  
743 at 80 °C for 5 hours. The mixture was purified by a reverse phase HPLC to give the desired product **9**  
744 (186 mg, 60% yield). <sup>1</sup>H NMR (600MHz, DMSO-d<sub>6</sub>): δ 13.15 (br s, 1H), 11.59 (s, 1H), 10.39 (s, 1H), 7.82 (d,  
745 1H, *J*=7.9 Hz), 7.65 (d, 1H, *J*=8.4Hz), 7.61 (t, 1H, *J*=7.8Hz), 7.42 (d, 1H, *J*=8.3Hz), 7.24 (t, 1H, *J*=7.6Hz), 7.05  
746 (t, 1H, *J*=7.6 Hz), 6.93 (d, 1H, *J*=7.6 Hz), 4.21 (s, 2H), 2.40 (s, 3H); <sup>13</sup>C NMR (151MHz, DMSO-d<sub>6</sub>): δ 169.7,  
747 163.5, 156.4, 151.4, 138.4, 135.9, 127.6, 125.3, 124.5, 120.3, 119.5, 118.4, 115.5, 112.4, 110.0, 32.6,  
748 23.6; HRMS (*m/z*): [M+H]<sup>+</sup> calcd. for C<sub>17</sub>H<sub>16</sub>N<sub>3</sub>O<sub>3</sub>, 310.1186; found, 310.1180.

749

750

751 **Supplementary References:**

- 752 1 Ji, Y. *et al.* Validation of antibacterial mechanism of action using regulated antisense RNA  
753 expression in *Staphylococcus aureus*. *FEMS Microbiol Lett* **231**, 177-184 (2004).
- 754 2 Huang, J. *et al.* Novel chromosomally encoded multidrug efflux transporter MdeA in  
755 *Staphylococcus aureus*. *Antimicrob Agents Chemother* **48**, 909-917 (2004).
- 756 3 Moffatt, J. H. *et al.* Colistin resistance in *Acinetobacter baumannii* is mediated by complete loss  
757 of lipopolysaccharide production. *Antimicrob Agents Chemother* **54**, 4971-4977 (2010).
- 758 4 Tomaras, A. P. *et al.* LpxC inhibitors as new antibacterial agents and tools for studying regulation  
759 of lipid A biosynthesis in Gram-negative pathogens. *MBio* **5**, e01551-01514 (2014).
- 760 5 McLeod, S. M. *et al.* Small-molecule inhibitors of gram-negative lipoprotein trafficking  
761 discovered by phenotypic screening. *J Bacteriol* **197**, 1075-1082 (2015).
- 762 6 Concha, N. *et al.* Discovery and Characterization of a Class of Pyrazole Inhibitors of Bacterial  
763 Undecaprenyl Pyrophosphate Synthase. *J Med Chem* **59**, 7299-7304 (2016).
- 764 7 Payne, D. J., Gwynn, M. N., Holmes, D. J. & Pompliano, D. L. Drugs for bad bugs: confronting the  
765 challenges of antibacterial discovery. *Nat Rev Drug Discov* **6**, 29-40 (2007).
- 766 8 Keen, N. T., Tamaki, S., Kobayashi, D. & Trollinger, D. Improved broad-host-range plasmids for  
767 DNA cloning in gram-negative bacteria. *Gene* **70**, 191-197 (1988).
- 768 9 Nakashima, N. & Tamura, T. Conditional gene silencing of multiple genes with antisense RNAs  
769 and generation of a mutator strain of *Escherichia coli*. *Nucleic Acids Res* **37**, e103 (2009).
- 770 10 Islam, M. M., Pandya, P., Kumar, S. & Kumar, G. S. RNA targeting through binding of small  
771 molecules: Studies on t-RNA binding by the cytotoxic protoberberine alkaloid coralyne. *Mol*  
772 *Biosyst* **5**, 244-254 (2009).
- 773 11 Lee, L. V. *et al.* Biophysical investigation of the mode of inhibition of tetracyclines, the allosteric  
774 inhibitors of undecaprenyl pyrophosphate synthase. *Biochemistry* **49**, 5366-5376 (2010).



775 12 Chang, S. Y., Ko, T. P., Chen, A. P., Wang, A. H. & Liang, P. H. Substrate binding mode and  
776 reaction mechanism of undecaprenyl pyrophosphate synthase deduced from crystallographic  
777 studies. *Protein Sci* **13**, 971-978 (2004).

778 13 Chang, S. Y., Ko, T. P., Liang, P. H. & Wang, A. H. Catalytic mechanism revealed by the crystal  
779 structure of undecaprenyl pyrophosphate synthase in complex with sulfate, magnesium, and  
780 triton. *J Biol Chem* **278**, 29298-29307 (2003).

781 14 Kumar, A. *et al.* High-throughput screening and sensitized bacteria identify an M. tuberculosis  
782 dihydrofolate reductase inhibitor with whole cell activity. *PLoS One* **7**, e39961 (2012).

783 15 Barry, A. L. Standardization of antimicrobial susceptibility testing. *Clin Lab Med* **9**, 203-219  
784 (1989).

785 16 (CLSI), C. a. L. S. I. Methods for dilution antimicrobial susceptibility tests for bacteria that grow  
786 aerobically; approved standard ninth edition, M07-A9, CLSI, Wayne, PA (2012).

787 17 Wucherpfennig, K., Nicholson, M., Xing, X., Stein, R., & Cuny, G. Preparation of 2-carboxy-3-  
788 indoleacetamides for enhancing MHC class II therapies. PCT International Application, WO  
789 2008121836 A1 filed on Oct 09, 2008.

790

791
